# Supplementary material for: Development of a stereoselective Ugi reaction starting from an oxanorbornene β-amino acid derivative
Source: Royal Society of Chemistry journal article supplement (doi:10.1039/c2ob25060h), 2012-01-01

## **Development of a stereoselective Ugi reaction starting from an oxanorbornene $\beta$ -amino acid derivative**

Luca Banfi,<sup>a</sup> Andrea Basso,<sup>a\*</sup> Cinzia Chiappe,<sup>b\*</sup> Fabio De Moliner,<sup>a</sup> Renata Riva<sup>a</sup> and Lorenzo Sonaglia<sup>a</sup>

<sup>a</sup>Università degli Studi di Genova, Dipartimento di Chimica e Chimica Industriale, Genova (Italy).

<sup>b</sup>Univeristà degli Studi di Pisa, Dipartimento di Chimica e Chimica Industriale, Pisa (Italy). Email: [andrea.basso@unige.it](mailto:andrea.basso@unige.it) (A.B.) [cinziac@farm.unipi.it](mailto:cinziac@farm.unipi.it) (C.C.)

## **COPIES OF NMR SPECTRA FOR COMPOUNDS 3, 9, 11a-l, 18**

|                        |    |
|------------------------|----|
| Compound <b>3</b>      | 2  |
| Compound <b>9</b>      | 3  |
| Compounds <b>11a-l</b> | 4  |
| Compound <b>18</b>     | 16 |

**compound 3**

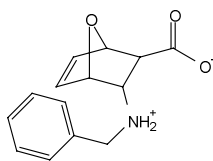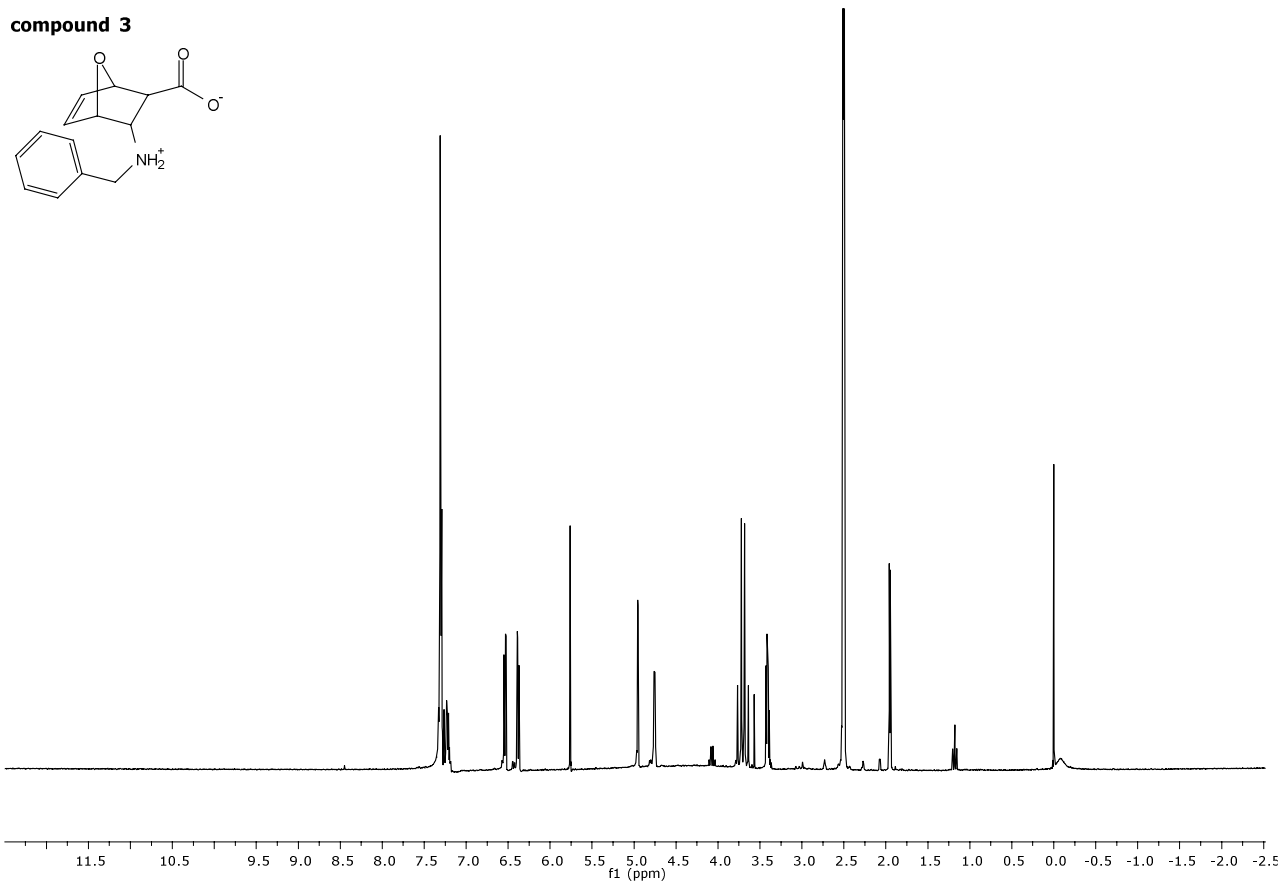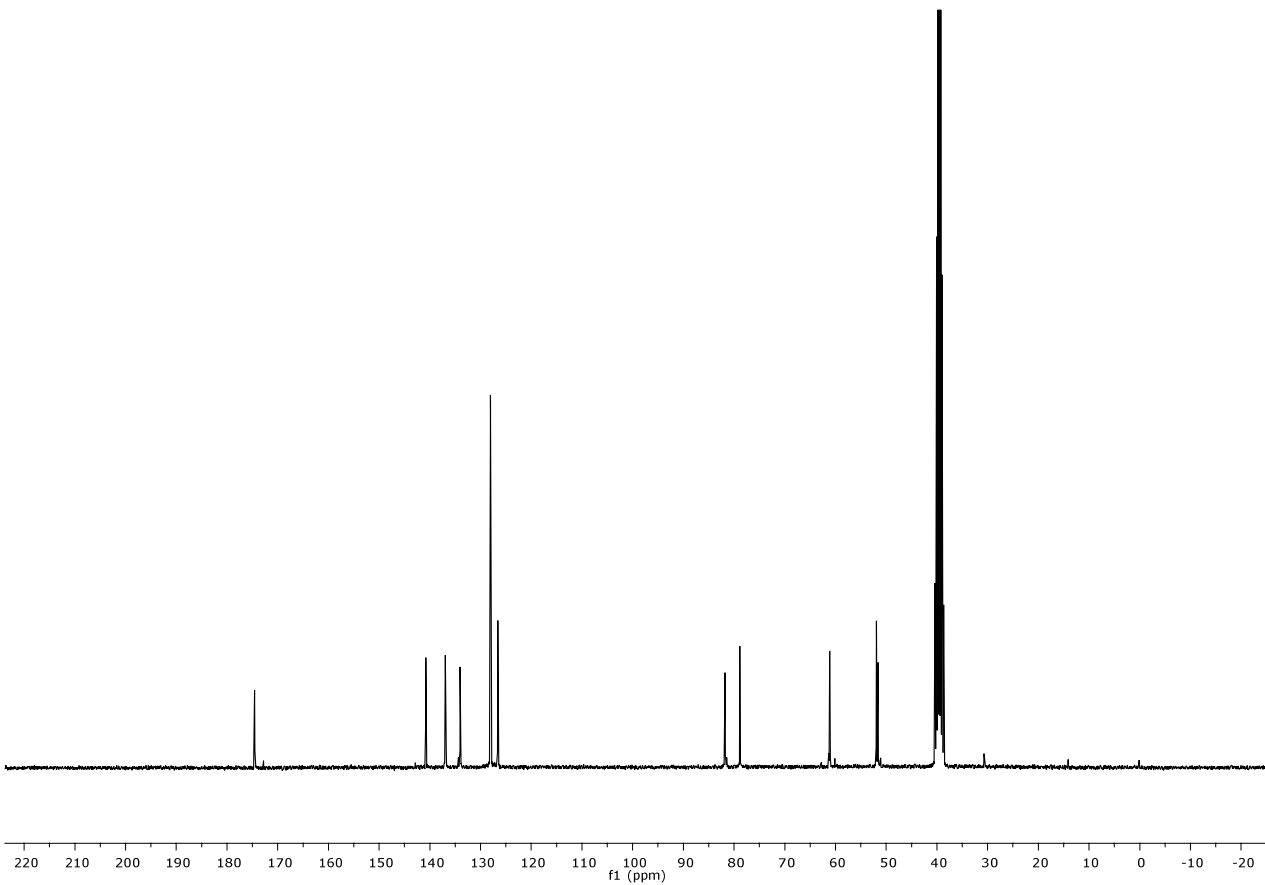

**compound 9**

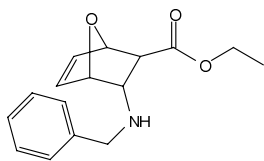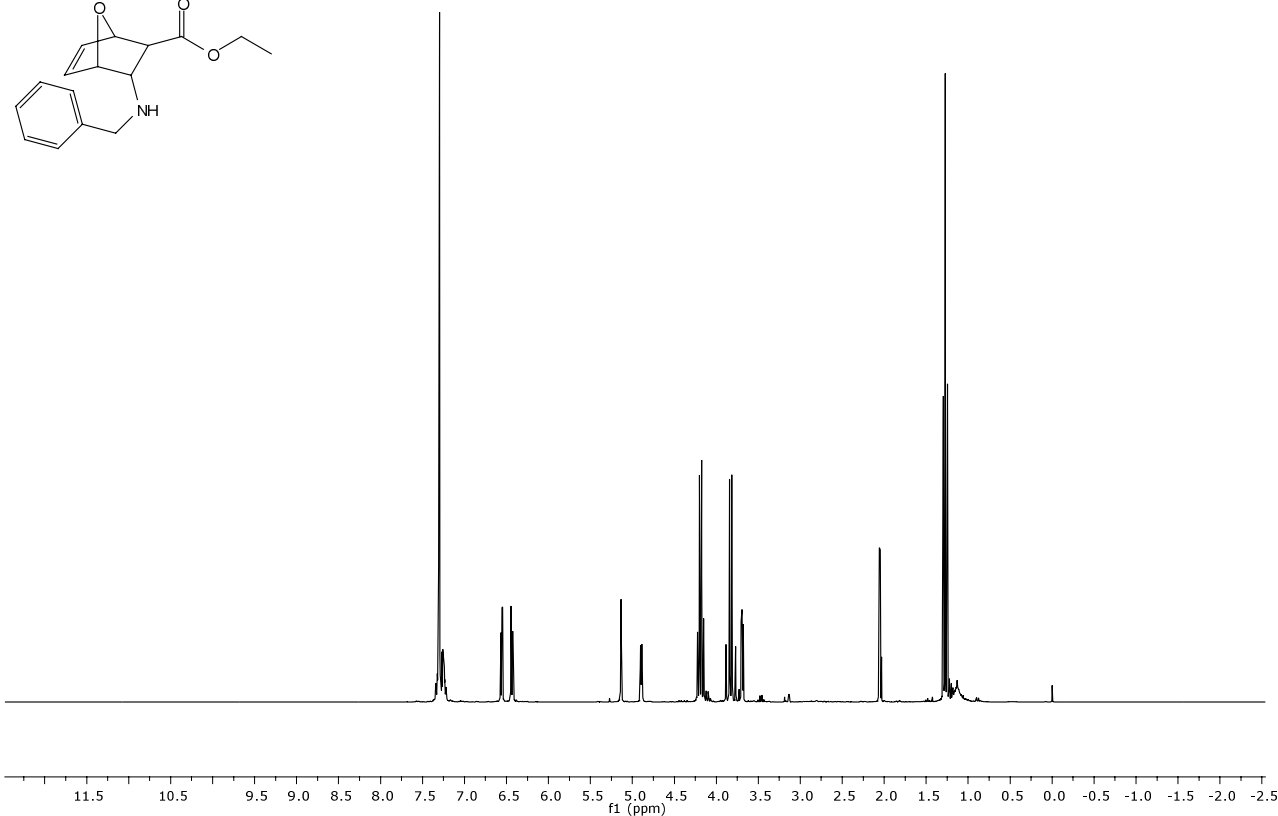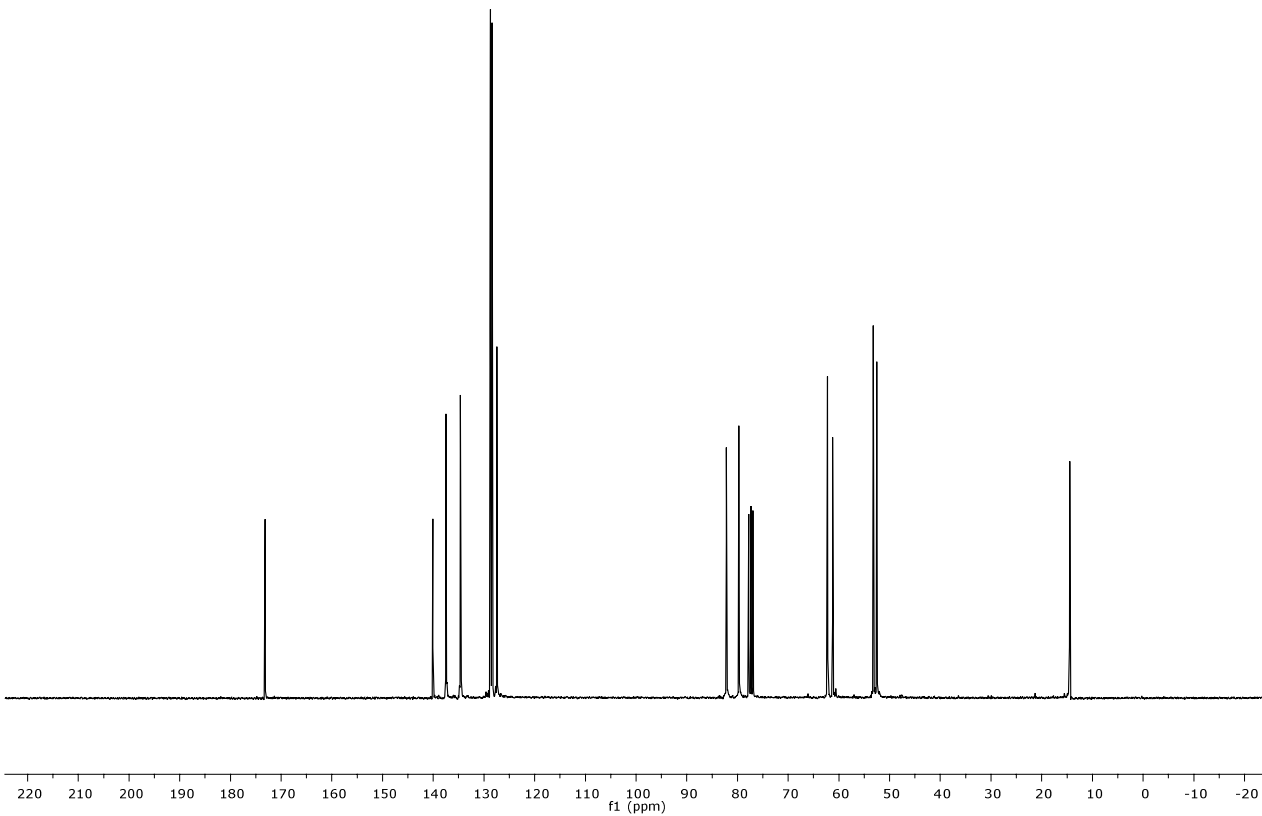

**compound 11a**

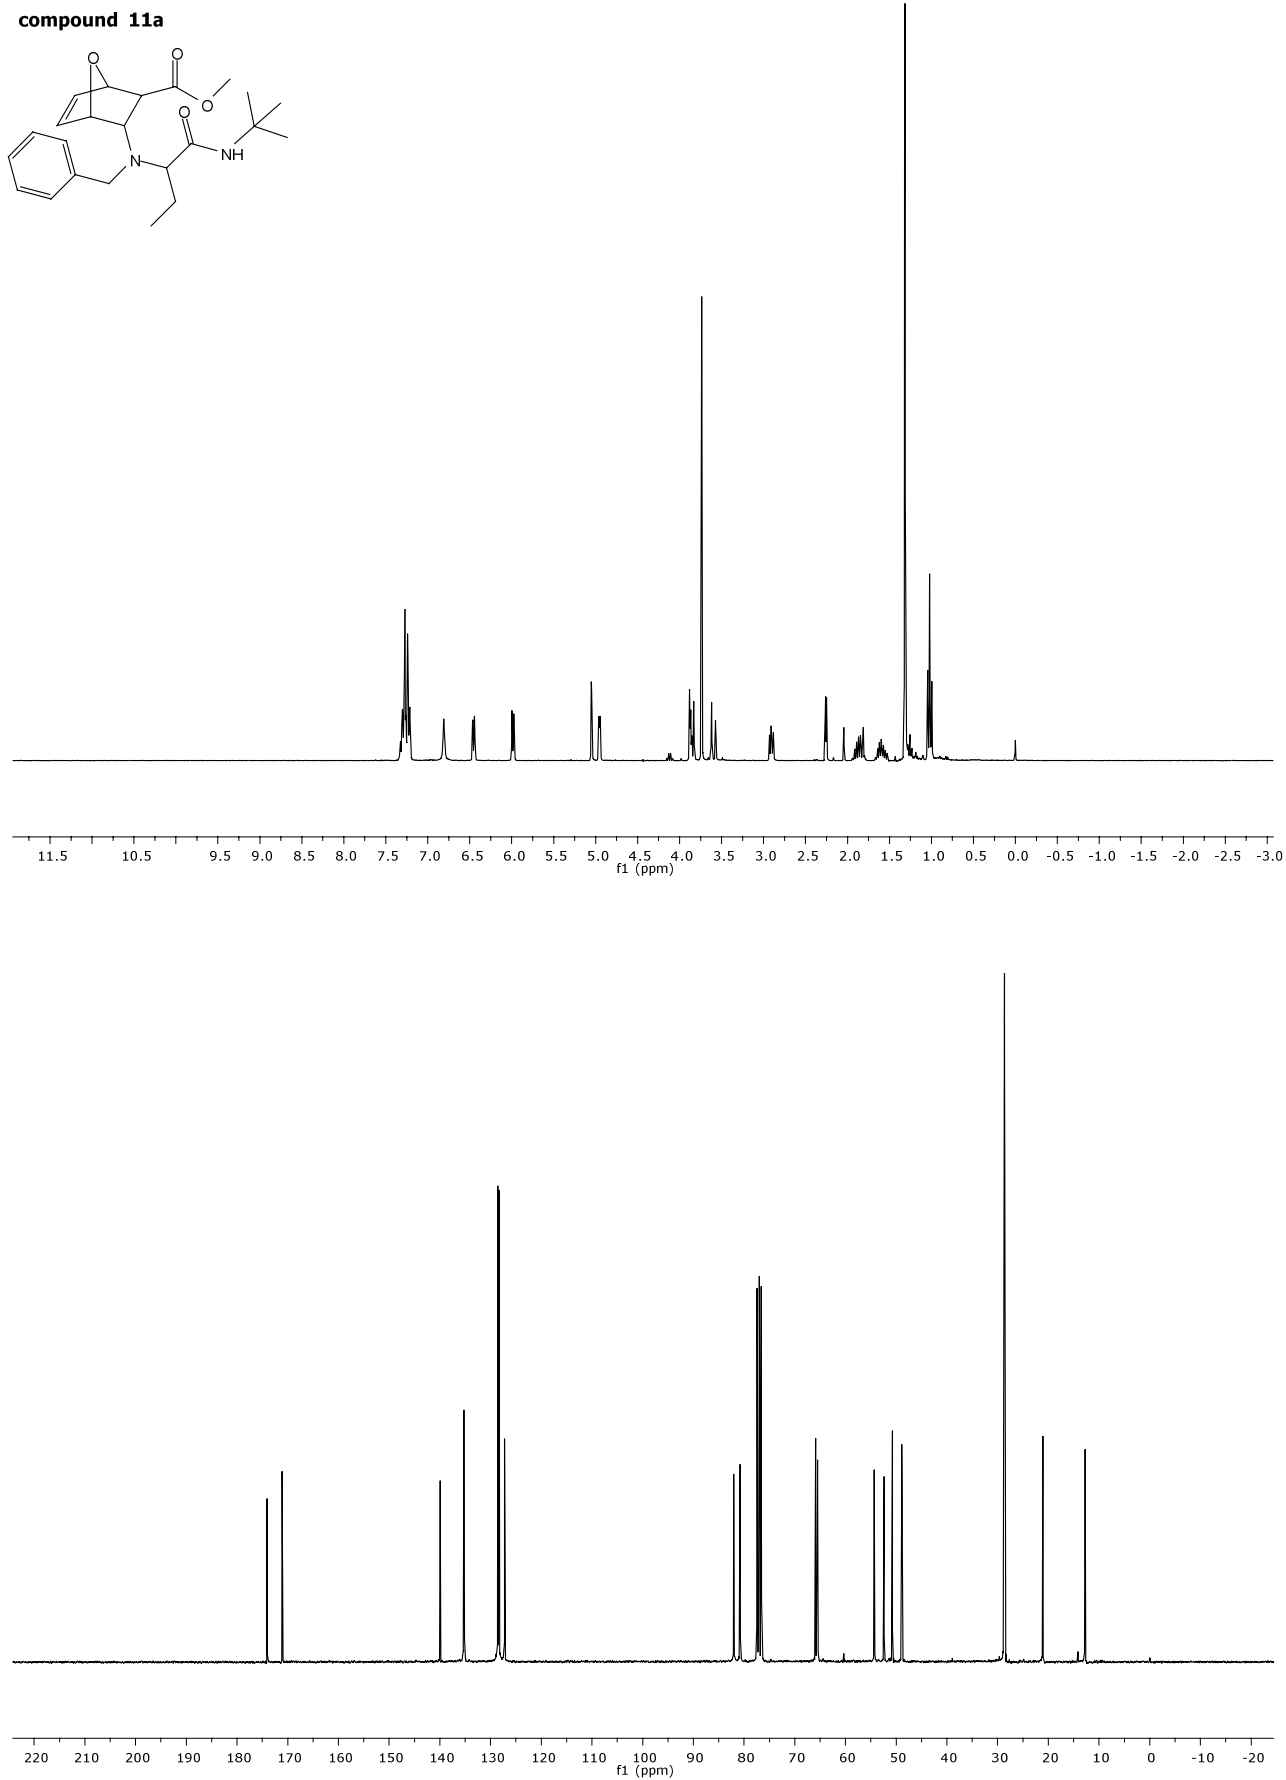

**compound 11b**

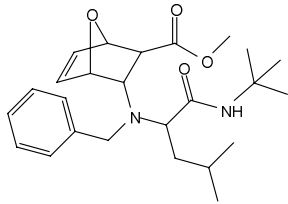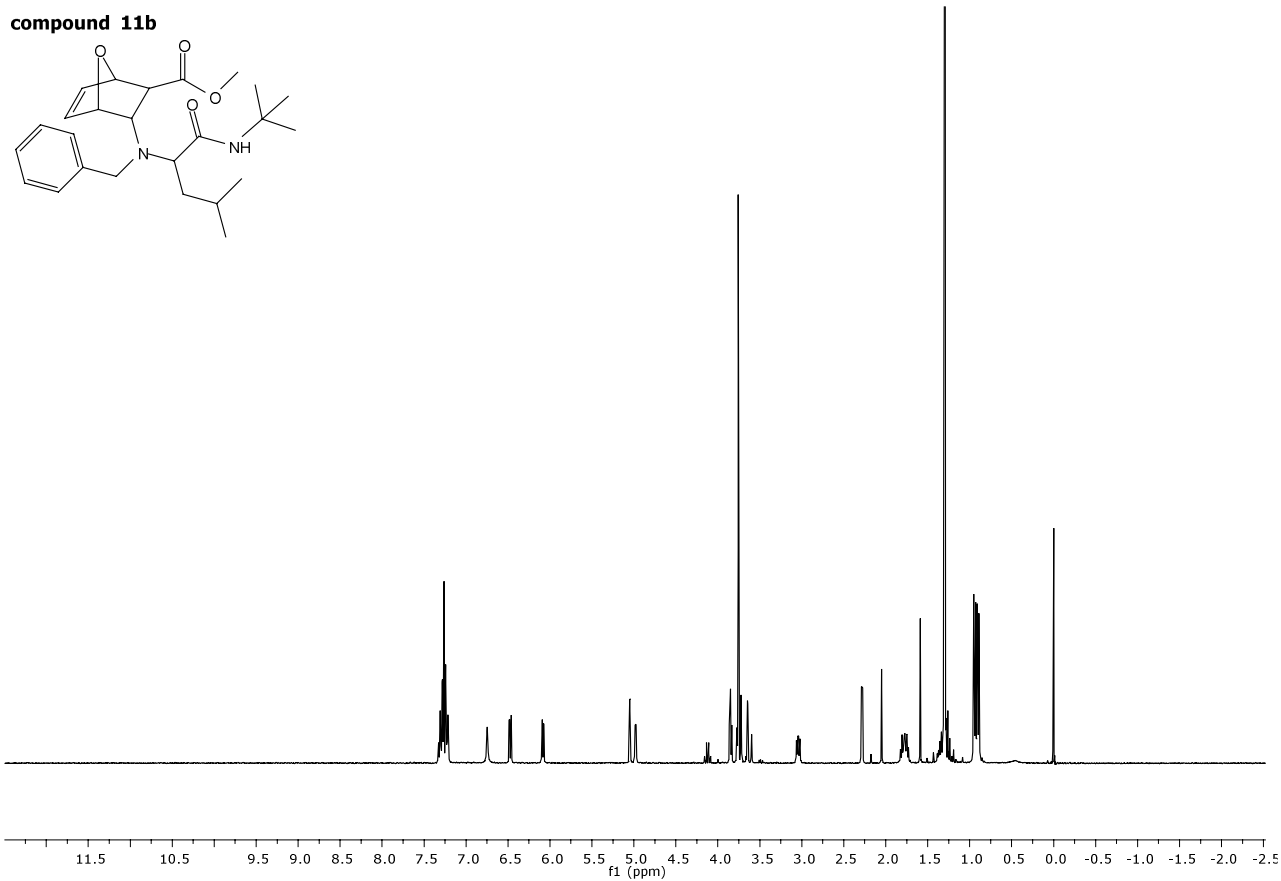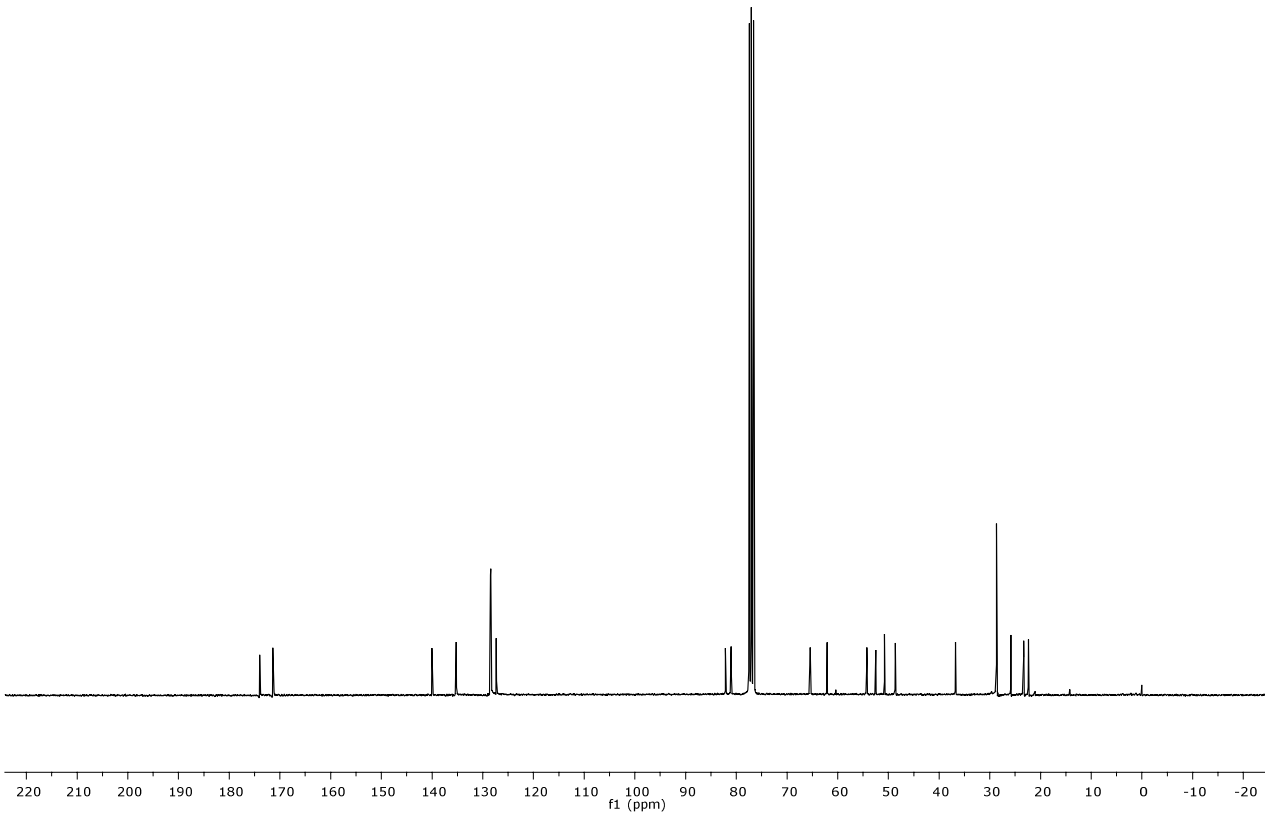

**compound 11c**

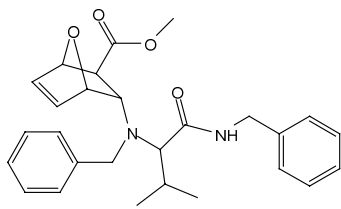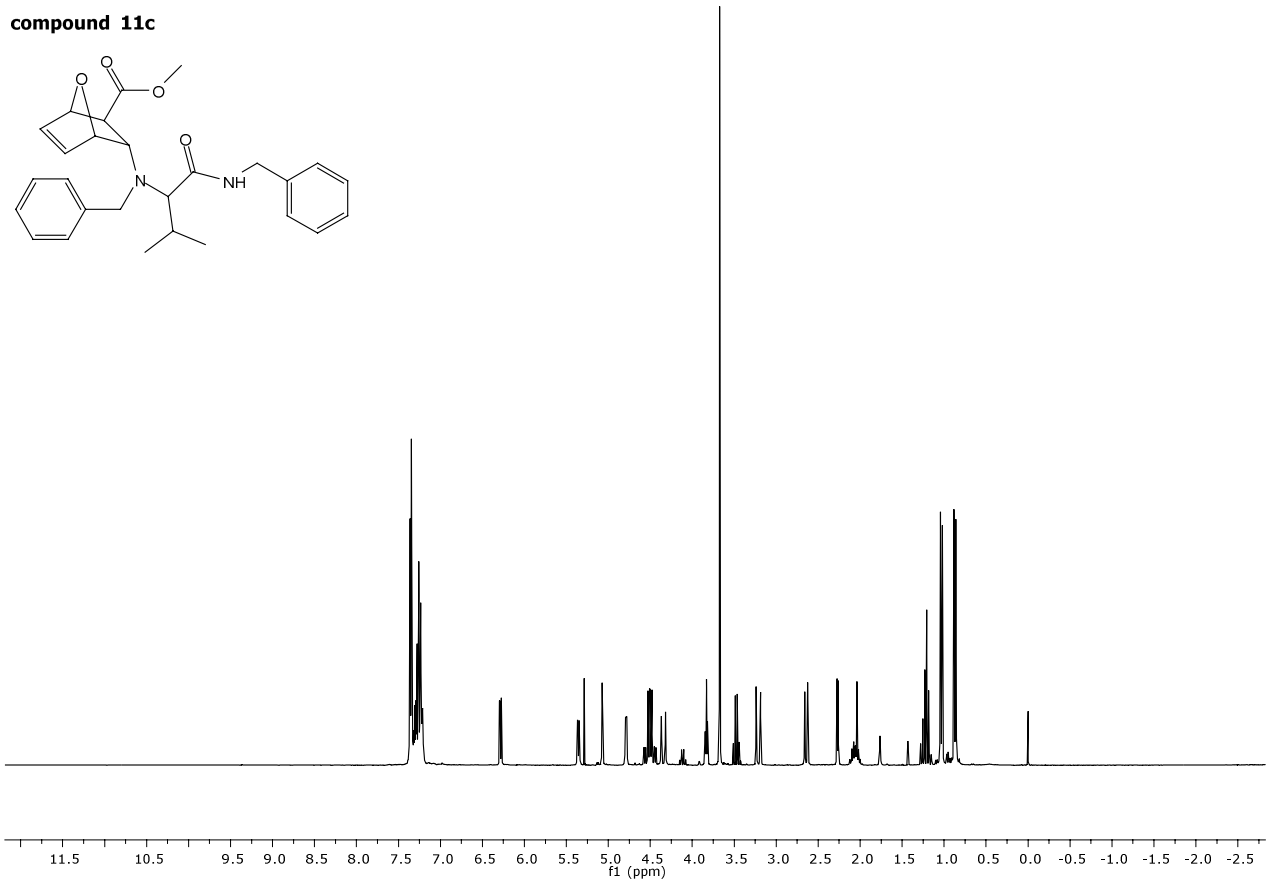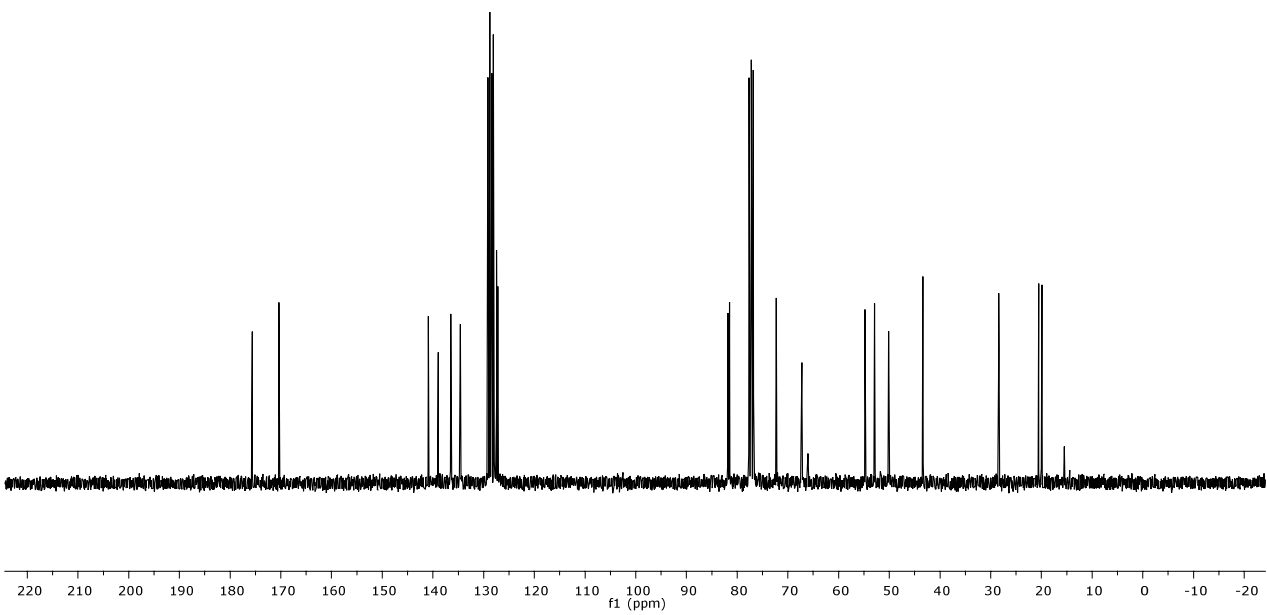

compound 11d

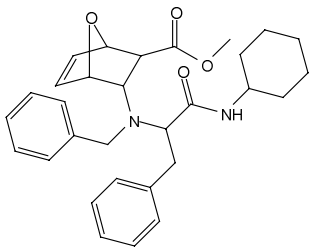

**compound 11e**

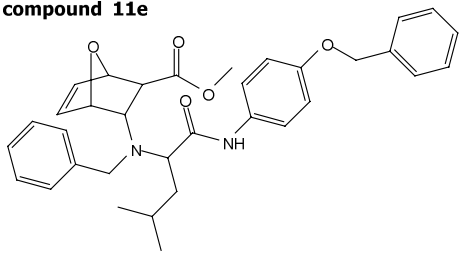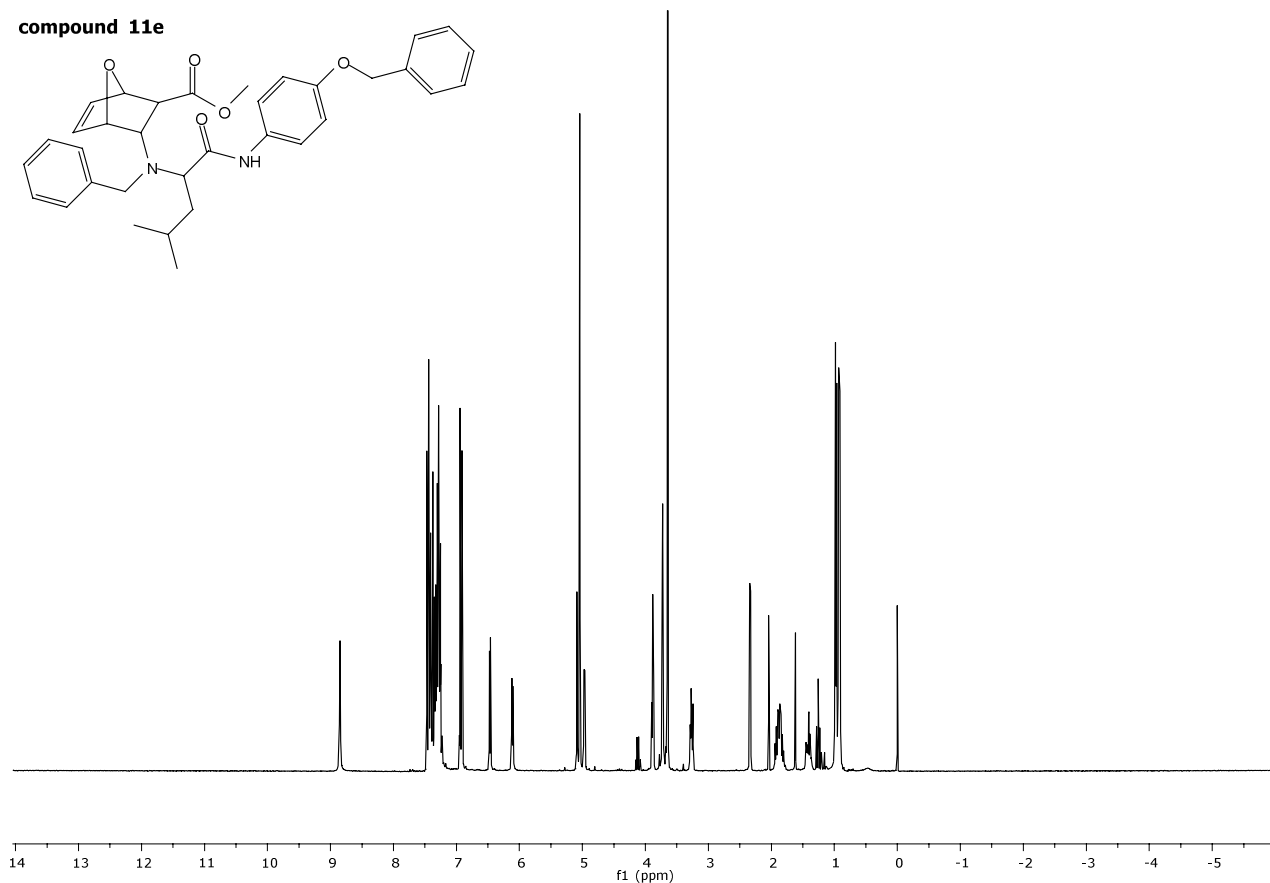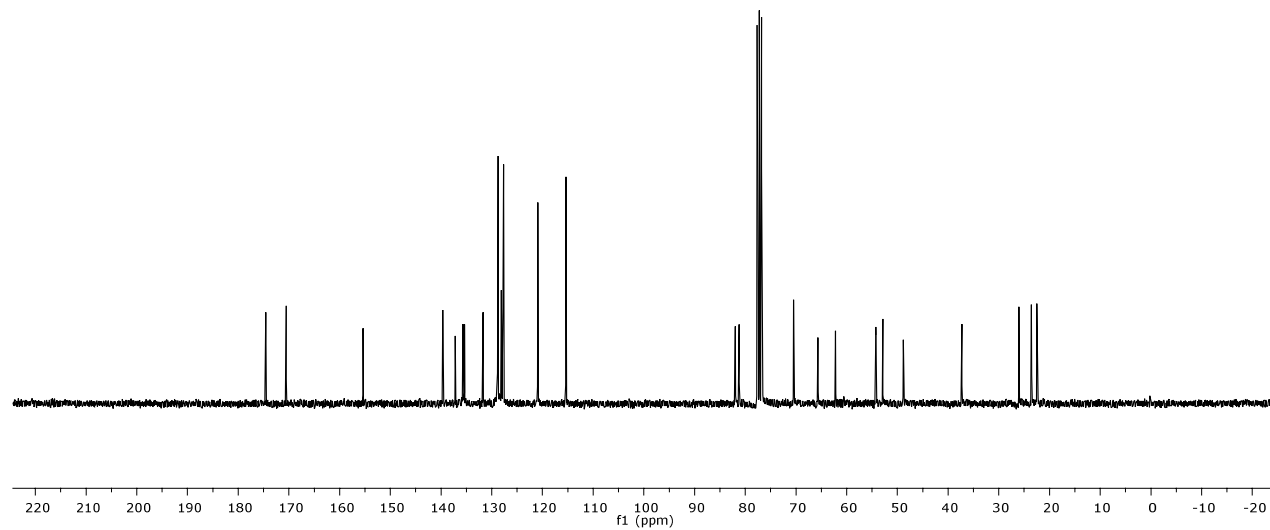



compound 11f

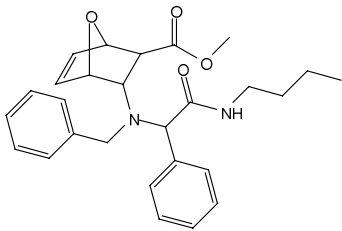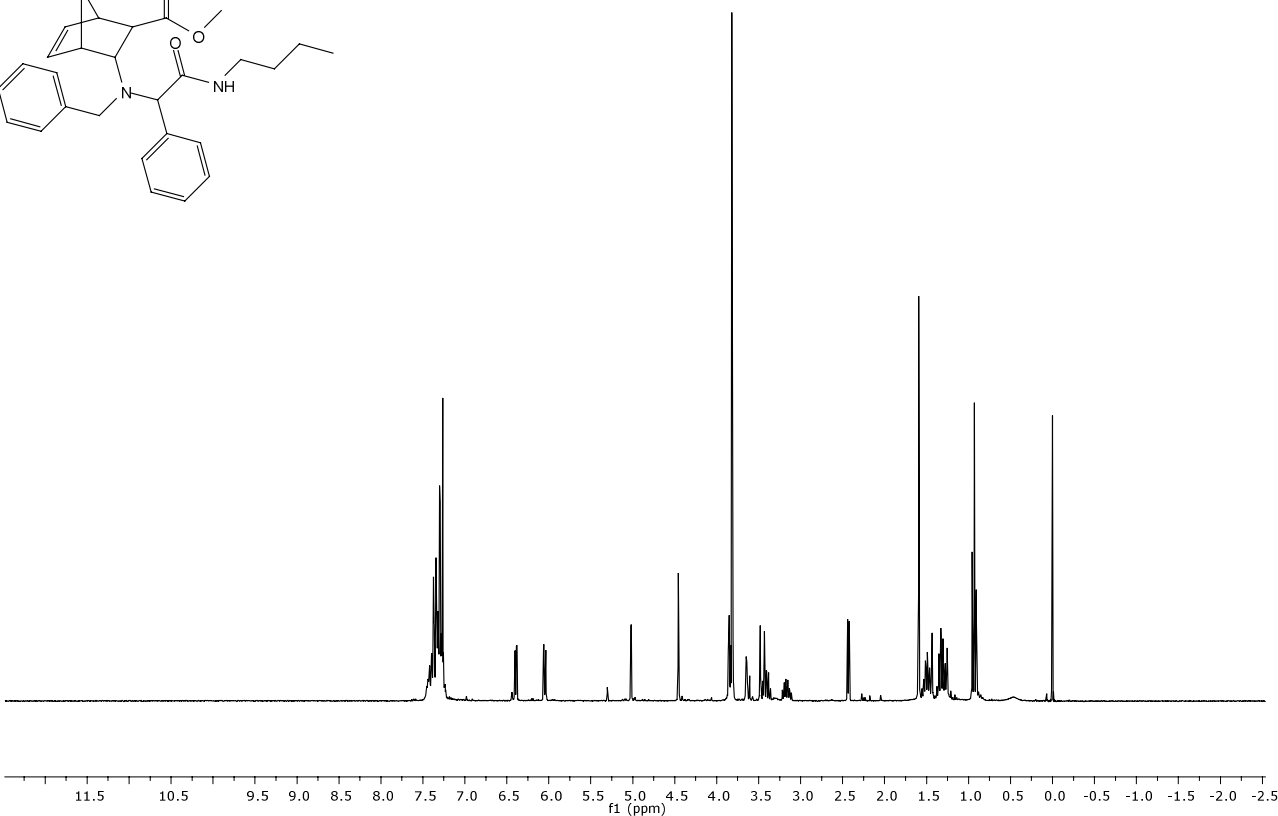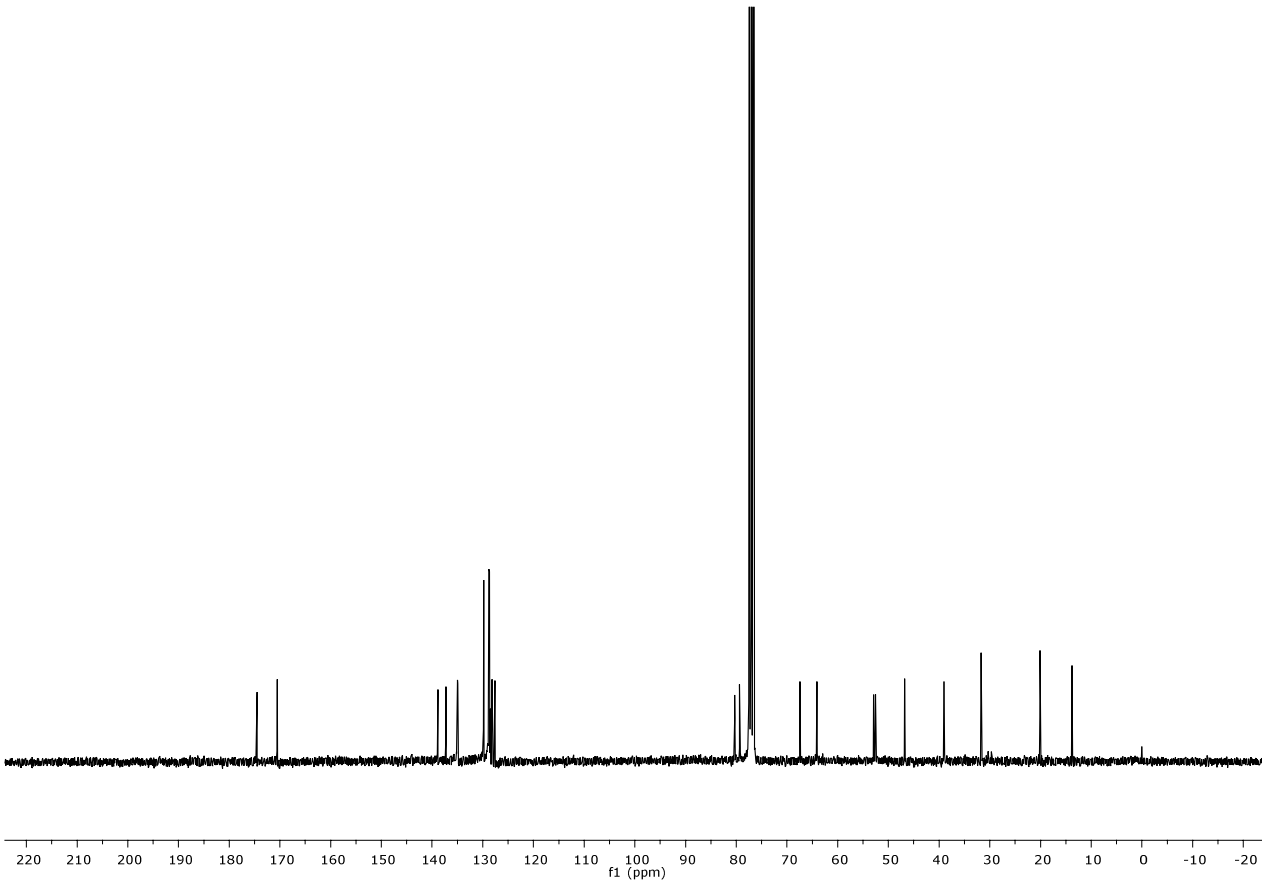

compound 11g

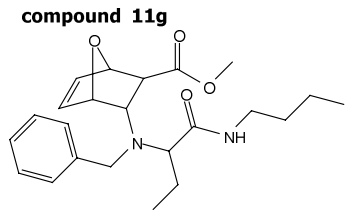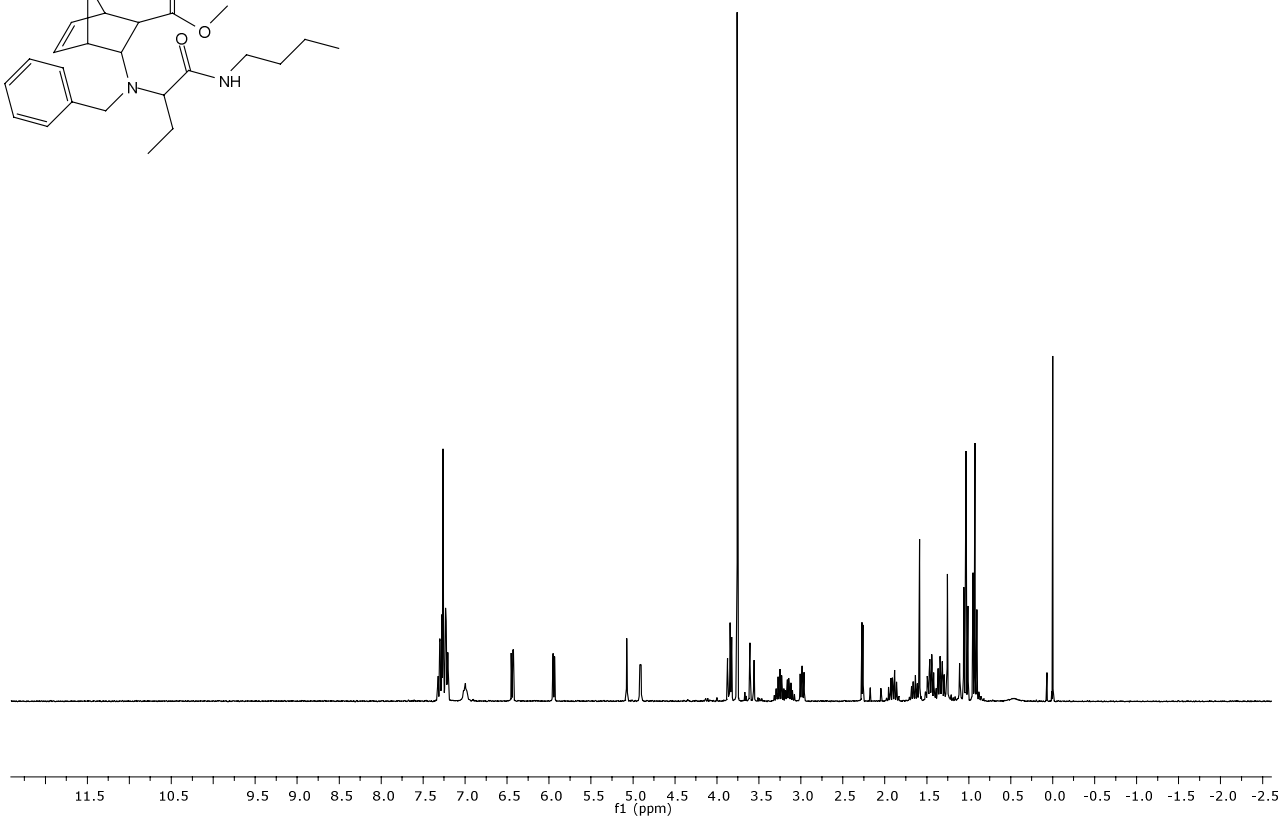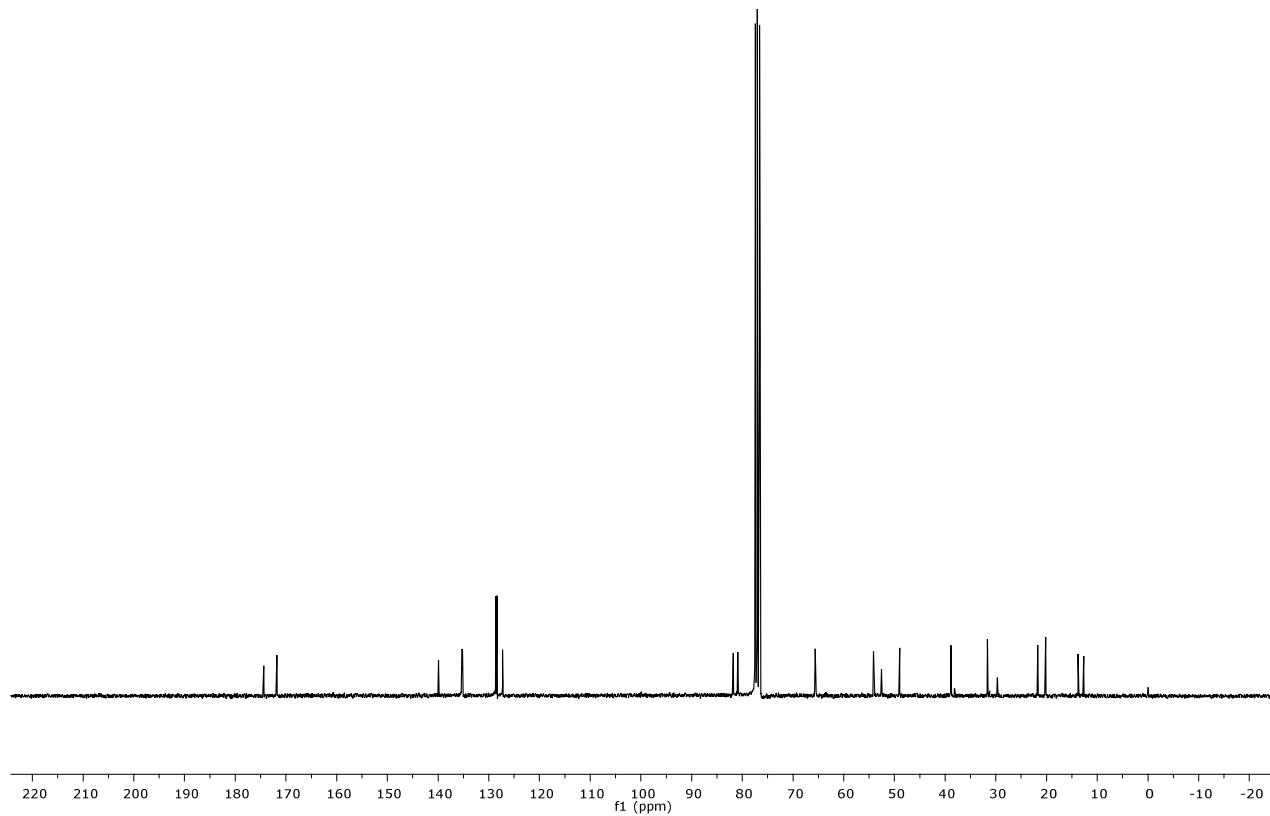

compound 11h

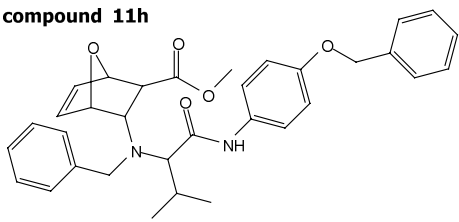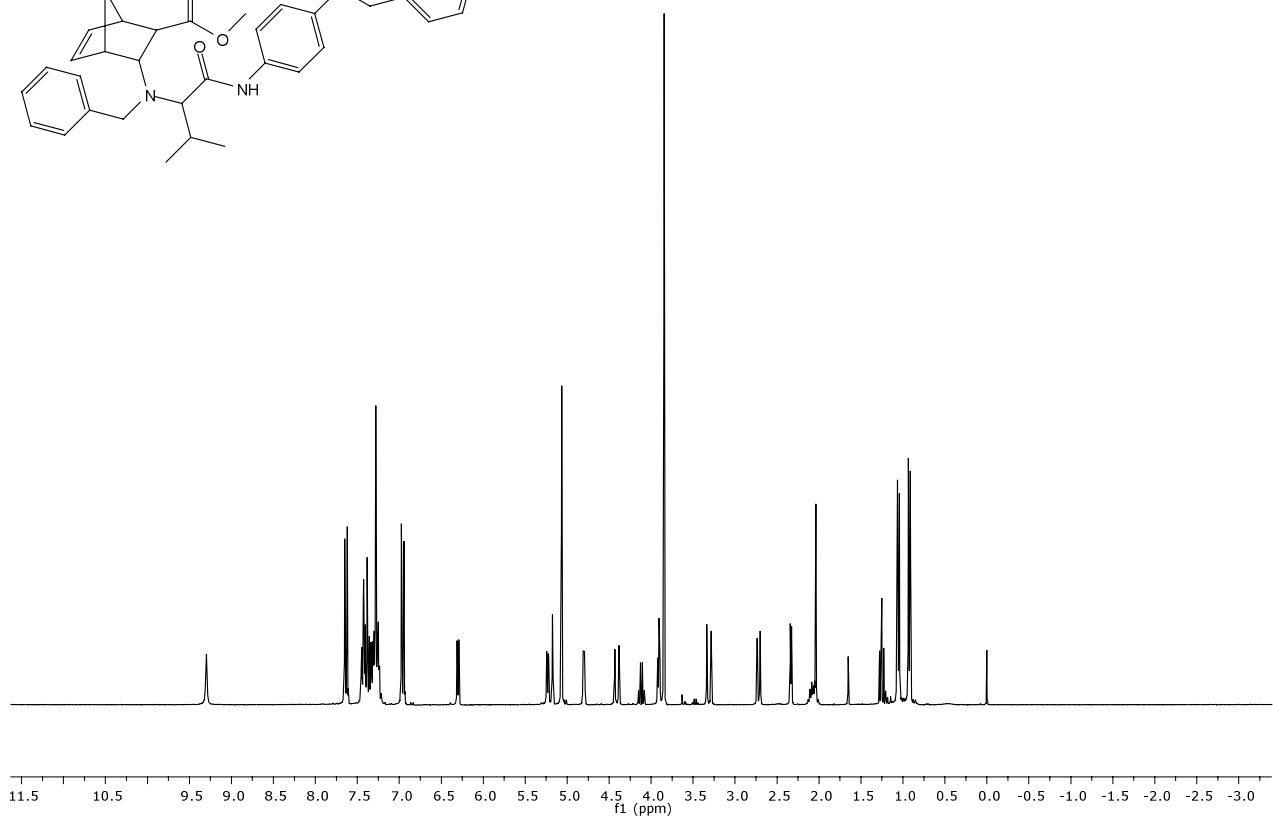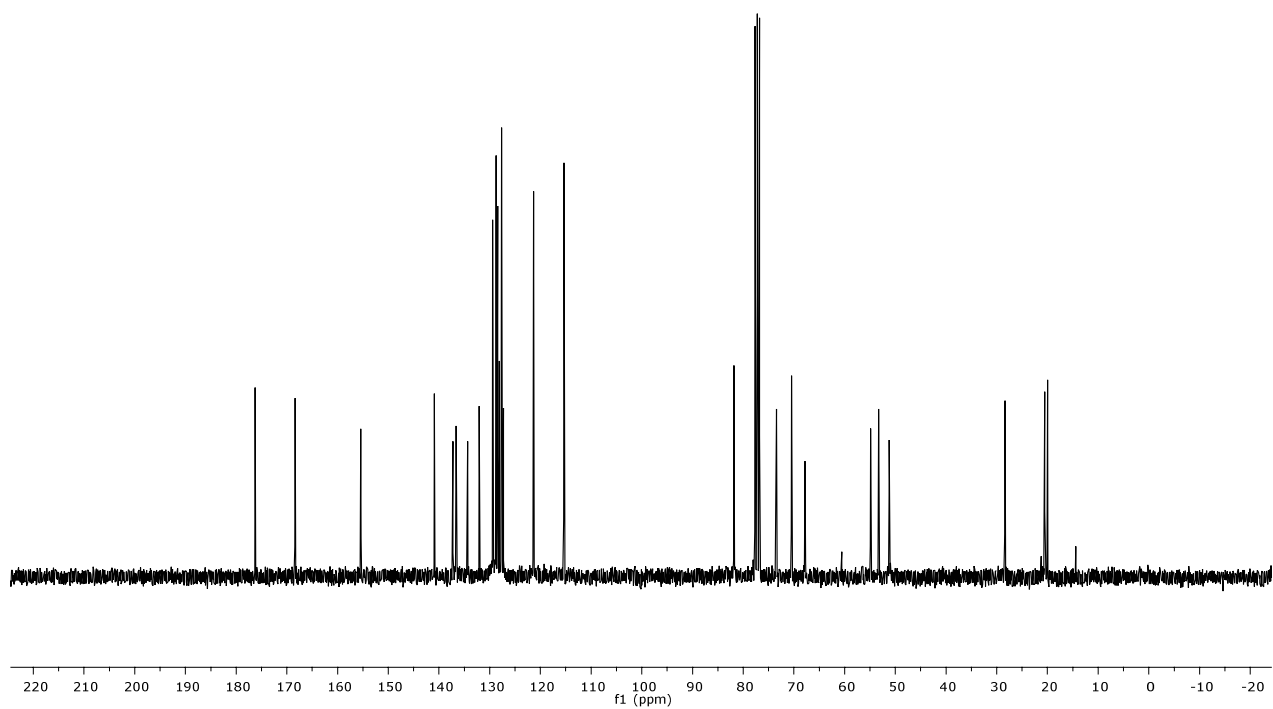

compound 11i

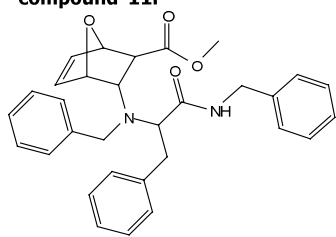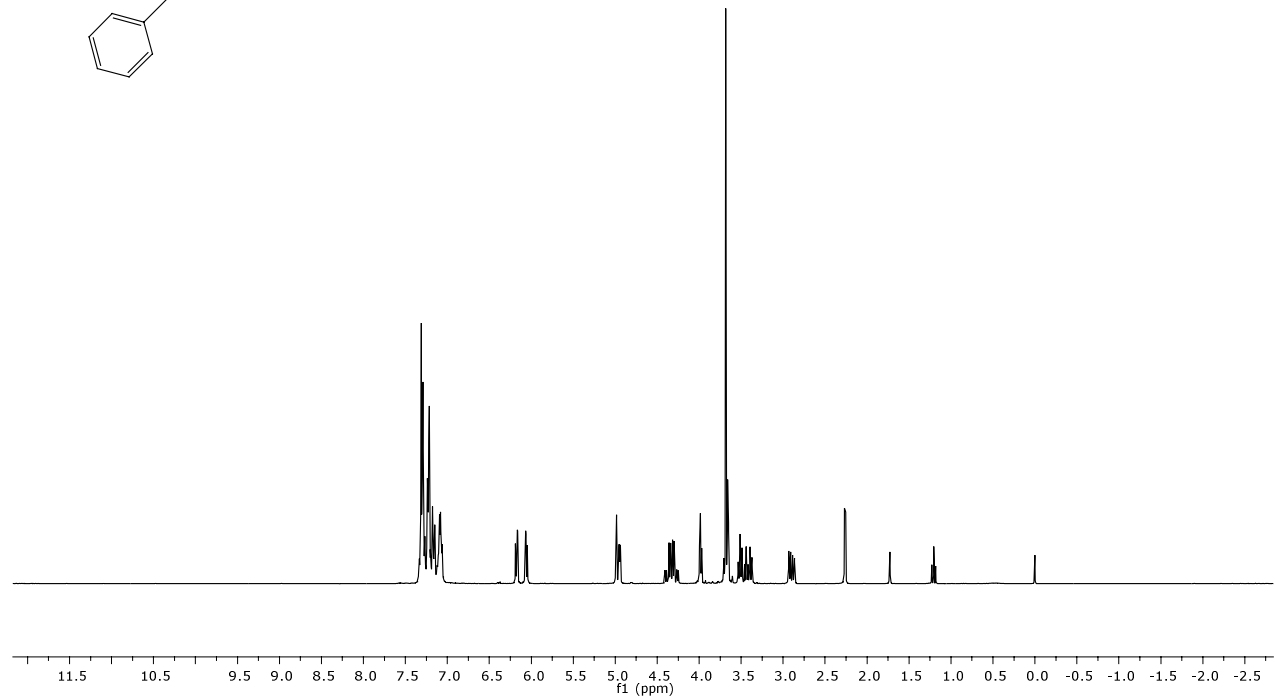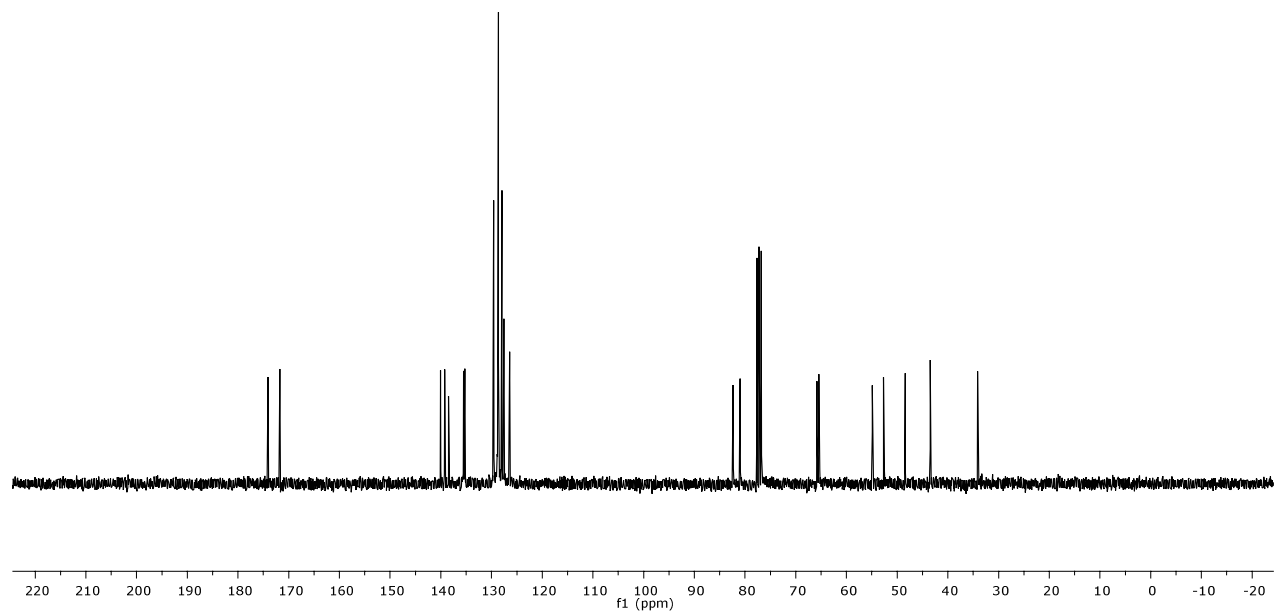

**compound 11j**

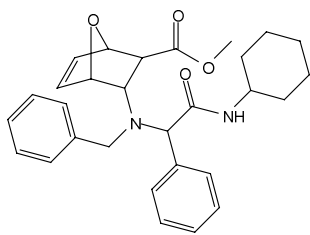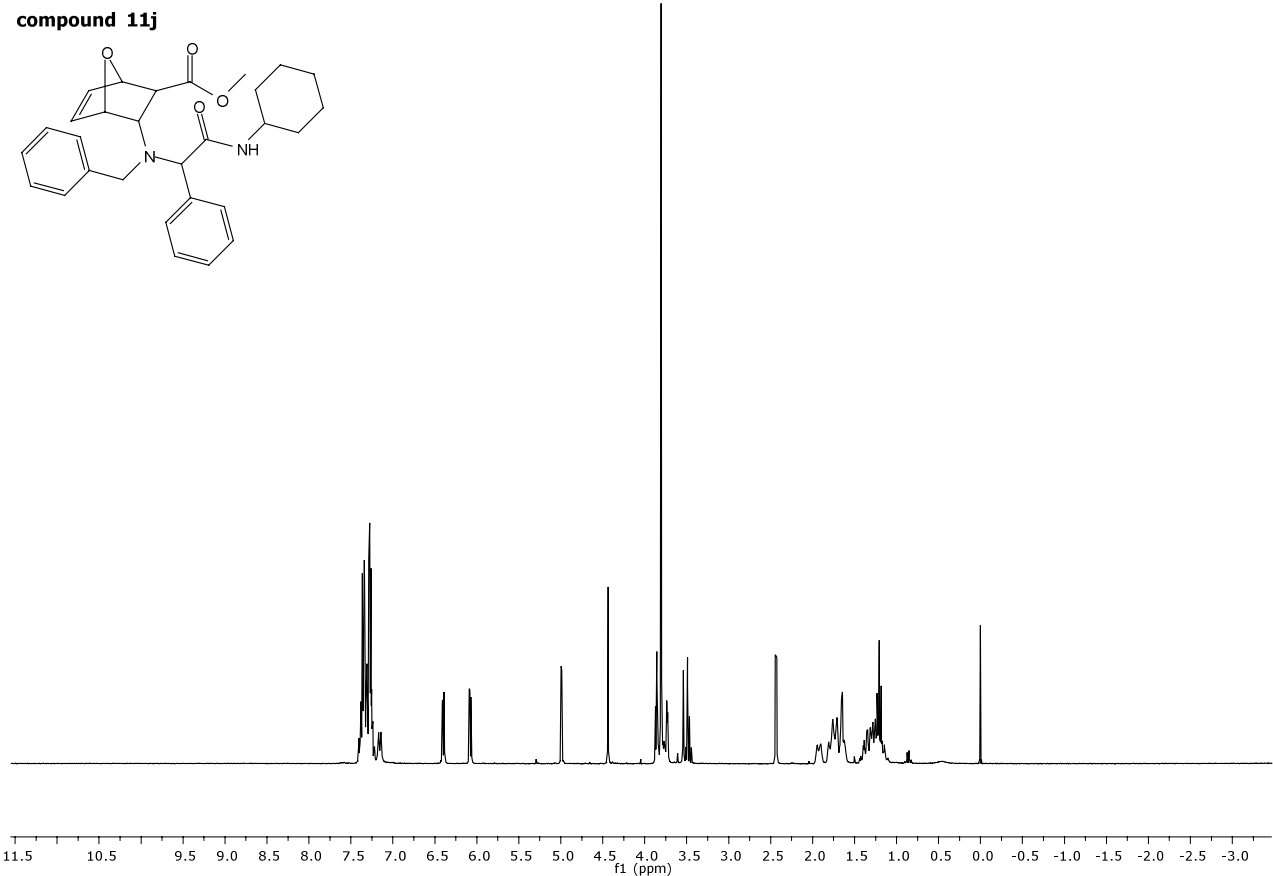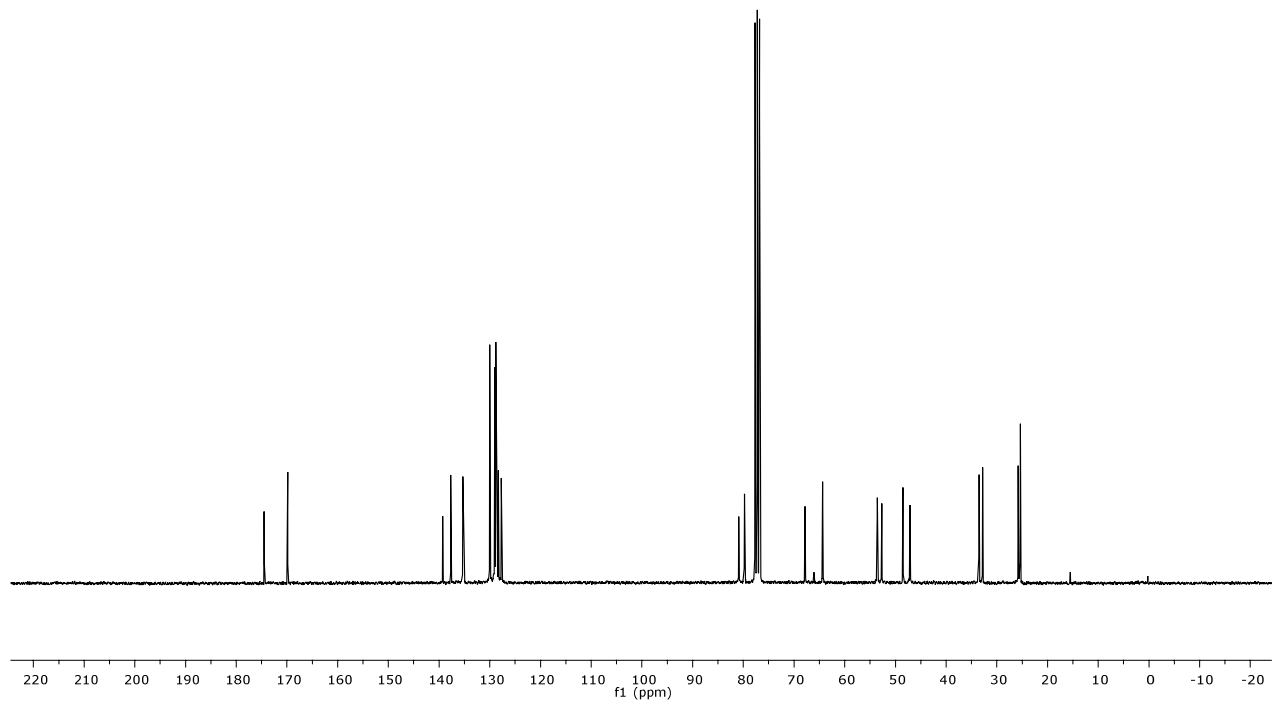

**compound 11k**  
**mix. diast.**

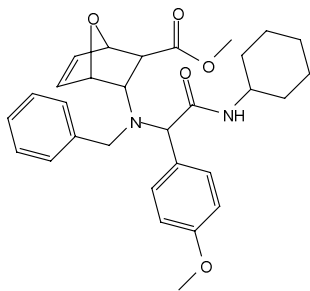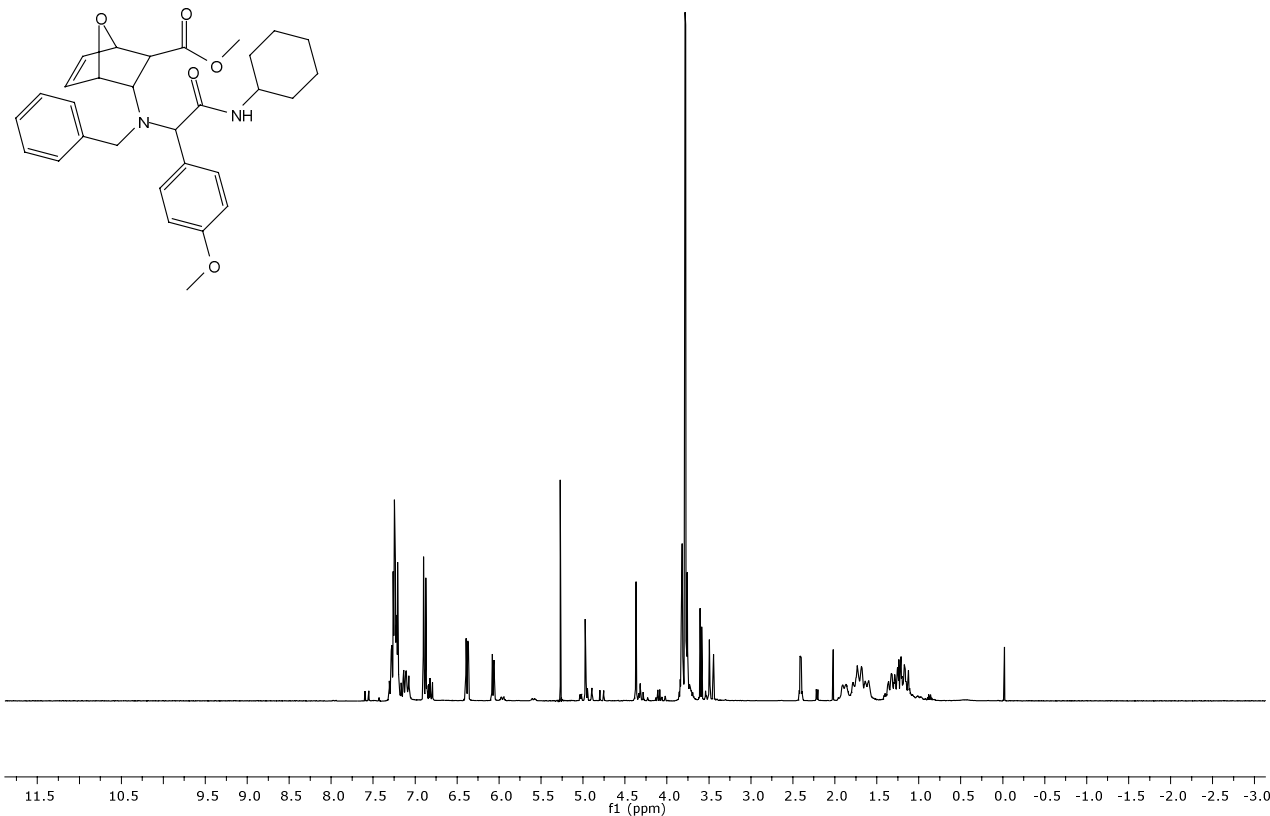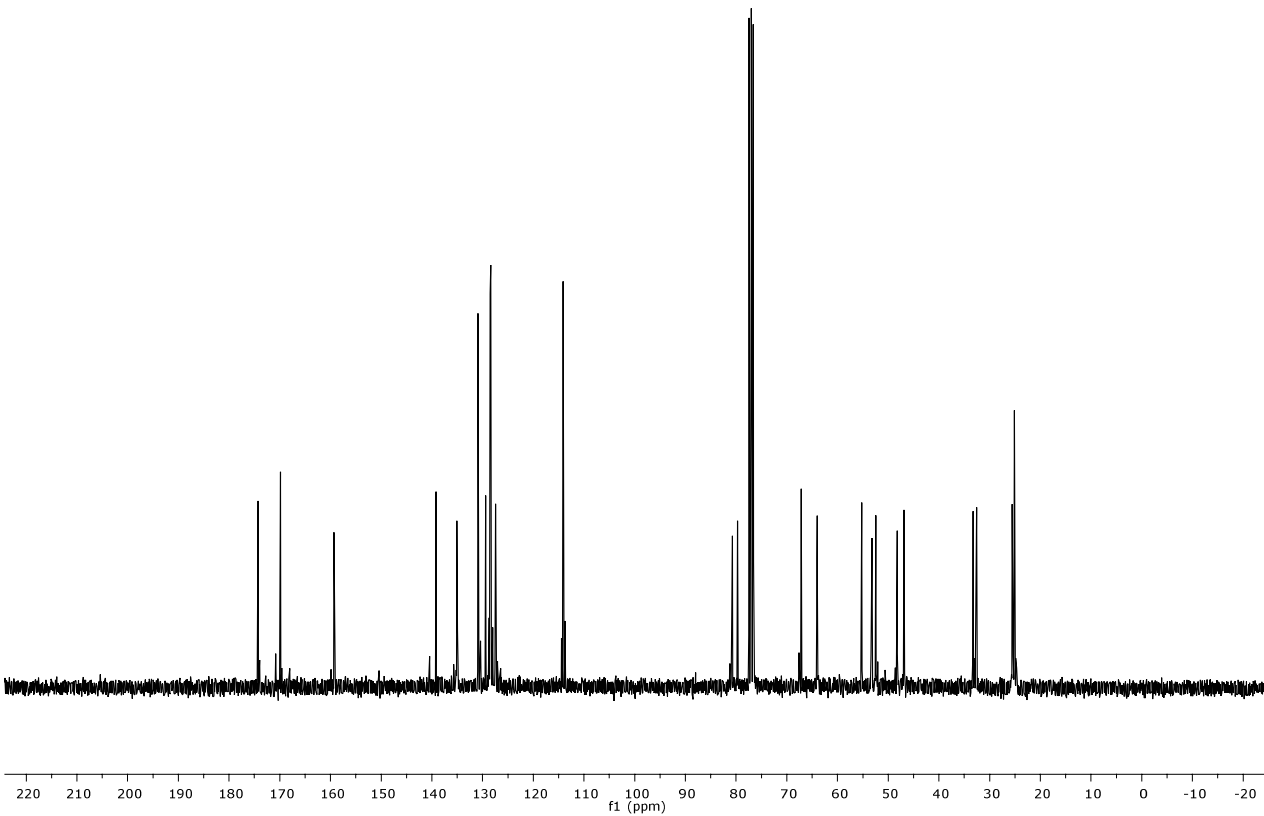

**compound 11l**  
**mix. diast.**

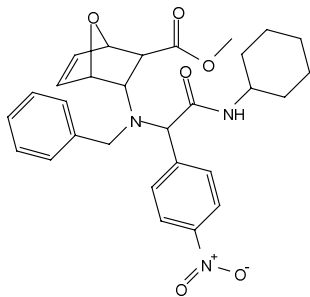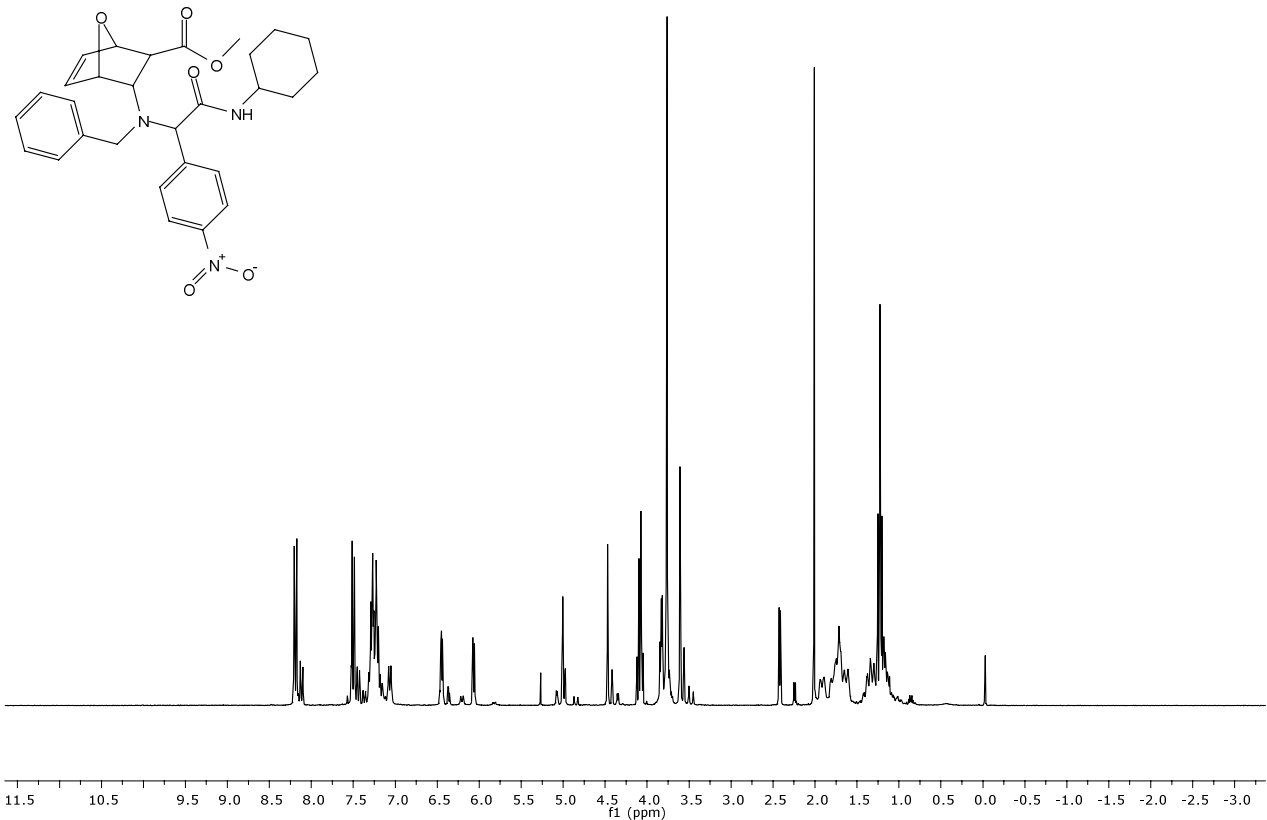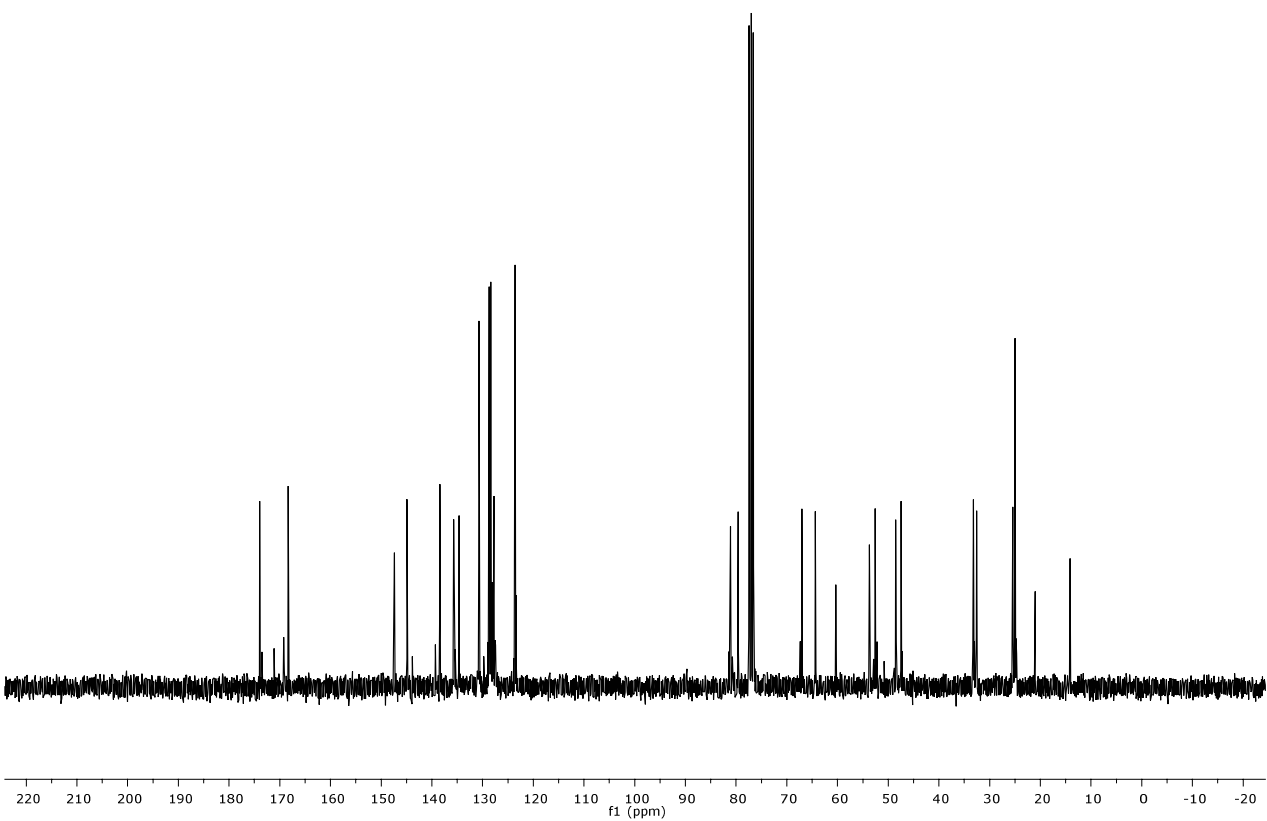

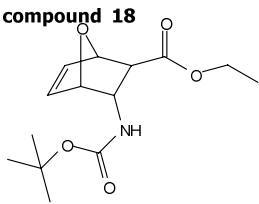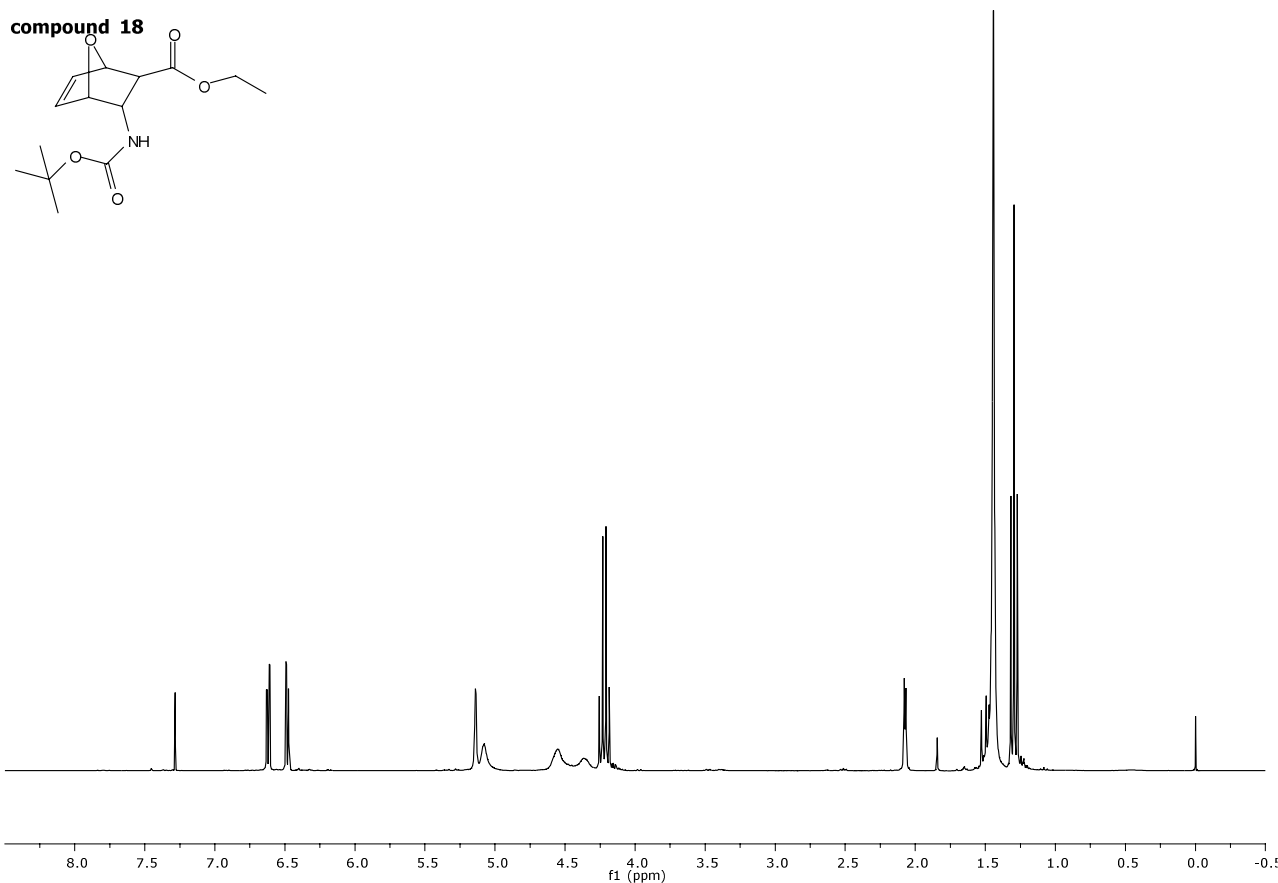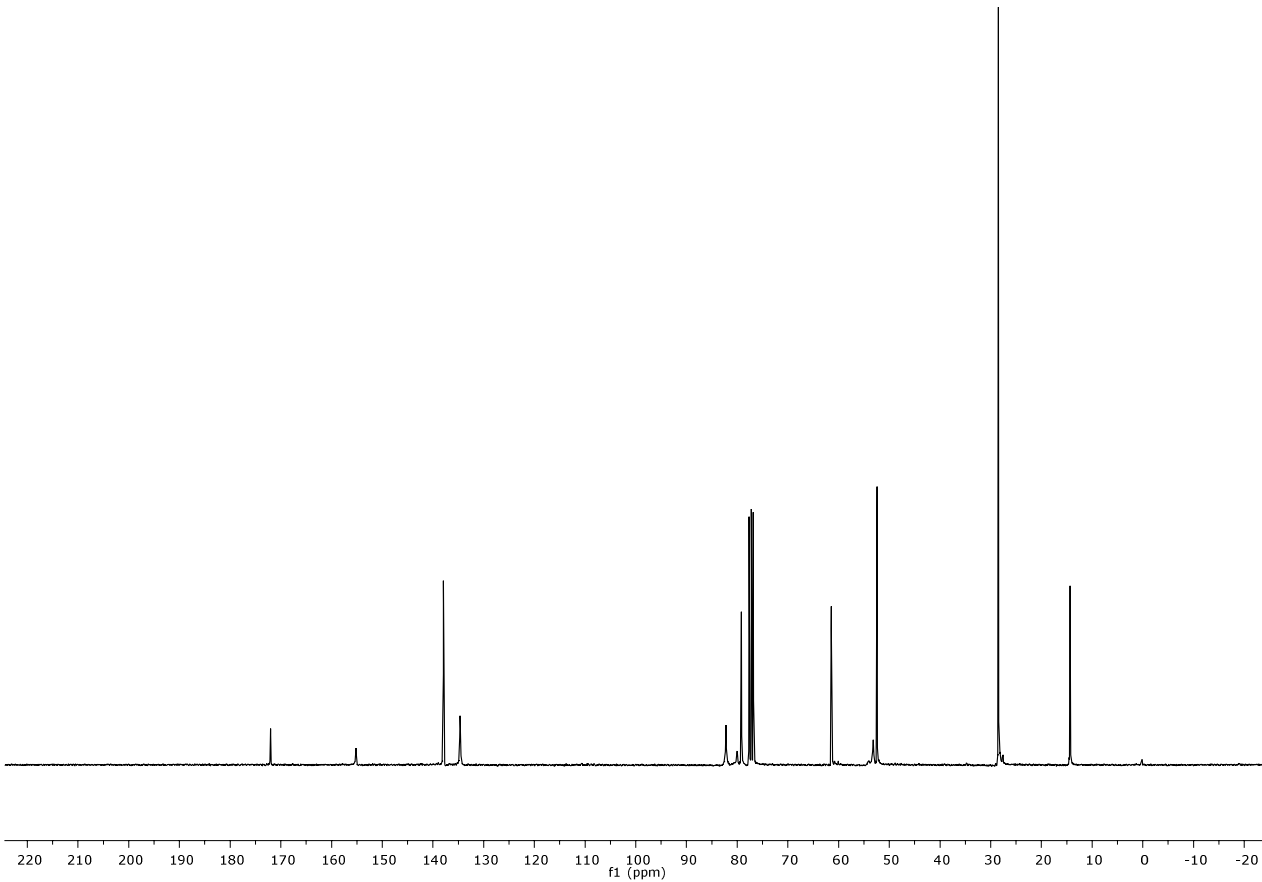

Supplement: c2ob25060h_2.pdf [file c2ob25060h_2.pdf]
