# Supplementary material for: Development of a stereoselective Ugi reaction starting from an oxanorbornene β-amino acid derivative
Source: Royal Society of Chemistry journal article supplement (doi:10.1039/c2ob25060h), 2012-01-01
Supplement: c2ob25060h.pdf [file c2ob25060h.pdf]

## Development of a stereoselective Ugi reaction starting from an oxanorbornene $\beta$ -amino acid derivative

Luca Banfi,<sup>a</sup> Andrea Basso,<sup>a\*</sup> Cinzia Chiappe,<sup>b\*</sup> Fabio De Moliner,<sup>a</sup> Renata Riva<sup>a</sup> and Lorenzo Sonaglia<sup>a</sup>

<sup>a</sup>Università degli Studi di Genova, Dipartimento di Chimica e Chimica Industriale, Genova (Italy).

<sup>b</sup>Univeristà degli Studi di Pisa, Dipartimento di Chimica e Chimica Industriale, Pisa (Italy). Email: [andrea.basso@unige.it](mailto:andrea.basso@unige.it) (A.B.) [cinziac@farm.unipi.it](mailto:cinziac@farm.unipi.it) (C.C.)

## COMPUTATIONAL DATA

### Index

|                    |    |
|--------------------|----|
| INTERMEDIATE 15i_a | 2  |
| INTERMEDIATE 15i_b | 21 |
| INTERMEDIATE 10i_a | 40 |
| INTERMEDIATE 10i_b | 50 |

**INTERMEDIATE 15i\_a**

%mem=256MB

-----  
# RB3LYP/6-31G SCRF=(PCM,Solvent=Methanol) Test  
-----

1/38=1/1;  
2/17=6,18=5,40=1/2;  
3/5=1,6=6,11=2,16=1,25=1,30=1,70=2201,72=3,74=-5/1,2,3;  
4/7=1/1;  
5/5=2,32=1,38=5,53=3/2;  
6/7=2,8=2,9=2,10=2,28=1/1;  
99/5=1,9=1/99;  
-----

[No Title]  
-----

Symbolic Z-matrix:

Charge = 0 Multiplicity = 1

|   |   |         |         |         |
|---|---|---------|---------|---------|
| C | 0 | -2.4604 | 2.7047  | 1.4908  |
| C | 0 | -3.0522 | 1.6114  | 0.9846  |
| C | 0 | -1.4863 | 3.1723  | 0.4463  |
| C | 0 | -0.3807 | 2.1152  | 0.4054  |
| C | 0 | -1.016  | 1.0392  | -0.4975 |
| C | 0 | -2.5116 | 1.4228  | -0.4028 |
| O | 0 | -2.301  | 2.8539  | -0.724  |
| C | 0 | 0.9142  | 2.41    | -0.2639 |
| N | 0 | -0.3369 | -0.2406 | -0.329  |
| O | 0 | 1.3617  | 3.5287  | -0.4808 |
| O | 0 | 1.5843  | 1.272   | -0.6142 |
| C | 0 | -0.9266 | -1.1252 | 0.6861  |
| C | 0 | -2.2309 | -1.758  | 0.2491  |
| C | 0 | -3.2557 | -1.9625 | 1.1854  |
| C | 0 | -4.4565 | -2.5654 | 0.8059  |
| C | 0 | -4.641  | -2.9877 | -0.5087 |
| C | 0 | -3.6223 | -2.8166 | -1.4431 |
| C | 0 | -2.4212 | -2.2138 | -1.0652 |
| C | 0 | 1.1091  | -0.0112 | -0.0843 |
| H | 0 | 1.3248  | 0.0053  | 0.9934  |
| C | 0 | 1.9424  | -1.116  | -0.7722 |
| C | 0 | 3.3727  | -1.1381 | -0.2782 |
| C | 0 | 3.7128  | -1.862  | 0.8735  |
| C | 0 | 5.0265  | -1.8623 | 1.3447  |
| C | 0 | 6.0102  | -1.1396 | 0.6722  |
| C | 0 | 5.6821  | -0.4161 | -0.4728 |
| C | 0 | 4.3693  | -0.4138 | -0.9465 |
| H | 0 | -2.5989 | 3.1279  | 2.4741  |
| H | 0 | -3.7854 | 0.9859  | 1.4695  |
| H | 0 | -1.2117 | 4.227   | 0.4722  |
| H | 0 | -0.1423 | 1.7821  | 1.4258  |
| H | 0 | -0.7776 | 1.2866  | -1.5484 |
| H | 0 | -3.1875 | 0.982   | -1.1367 |
| H | 0 | -0.2498 | -1.9624 | 0.9002  |
| H | 0 | -1.0565 | -0.5842 | 1.6319  |
| H | 0 | -3.1295 | -1.6509 | 2.2209  |
| H | 0 | -5.2472 | -2.7106 | 1.5385  |
| H | 0 | -5.5758 | -3.4592 | -0.8028 |
| H | 0 | -3.7607 | -3.158  | -2.4664 |
| H | 0 | -1.6326 | -2.1009 | -1.8071 |
| H | 0 | 1.5095  | -2.1086 | -0.5958 |
| H | 0 | 1.9408  | -0.9686 | -1.8603 |
| H | 0 | 2.9598  | -2.4348 | 1.4117  |
| H | 0 | 5.284   | -2.4282 | 2.2372  |
| H | 0 | 7.0336  | -1.1412 | 1.04    |

3

H 0 6.4502 0.1476 -0.9974  
 H 0 4.1307 0.1598 -1.8404

Input orientation:

| Center Number | Atomic Number | Atomic Type | Coordinates (Angstroms) |           |           |
|---------------|---------------|-------------|-------------------------|-----------|-----------|
|               |               |             | X                       | Y         | Z         |
| 1             | 6             | 0           | -2.460400               | 2.704700  | 1.490800  |
| 2             | 6             | 0           | -3.052200               | 1.611400  | 0.984600  |
| 3             | 6             | 0           | -1.486300               | 3.172300  | 0.446300  |
| 4             | 6             | 0           | -0.380700               | 2.115200  | 0.405400  |
| 5             | 6             | 0           | -1.016000               | 1.039200  | -0.497500 |
| 6             | 6             | 0           | -2.511600               | 1.422800  | -0.402800 |
| 7             | 8             | 0           | -2.301000               | 2.853900  | -0.724000 |
| 8             | 6             | 0           | 0.914200                | 2.410000  | -0.263900 |
| 9             | 7             | 0           | -0.336900               | -0.240600 | -0.329000 |
| 10            | 8             | 0           | 1.361700                | 3.528700  | -0.480800 |
| 11            | 8             | 0           | 1.584300                | 1.272000  | -0.614200 |
| 12            | 6             | 0           | -0.926600               | -1.125200 | 0.686100  |
| 13            | 6             | 0           | -2.230900               | -1.758000 | 0.249100  |
| 14            | 6             | 0           | -3.255700               | -1.962500 | 1.185400  |
| 15            | 6             | 0           | -4.456500               | -2.565400 | 0.805900  |
| 16            | 6             | 0           | -4.641000               | -2.987700 | -0.508700 |
| 17            | 6             | 0           | -3.622300               | -2.816600 | -1.443100 |
| 18            | 6             | 0           | -2.421200               | -2.213800 | -1.065200 |
| 19            | 6             | 0           | 1.109100                | -0.011200 | -0.084300 |
| 20            | 1             | 0           | 1.324800                | 0.005300  | 0.993400  |
| 21            | 6             | 0           | 1.942400                | -1.116000 | -0.772200 |
| 22            | 6             | 0           | 3.372700                | -1.138100 | -0.278200 |
| 23            | 6             | 0           | 3.712800                | -1.862000 | 0.873500  |
| 24            | 6             | 0           | 5.026500                | -1.862300 | 1.344700  |
| 25            | 6             | 0           | 6.010200                | -1.139600 | 0.672200  |
| 26            | 6             | 0           | 5.682100                | -0.416100 | -0.472800 |
| 27            | 6             | 0           | 4.369300                | -0.413800 | -0.946500 |
| 28            | 1             | 0           | -2.598900               | 3.127900  | 2.474100  |
| 29            | 1             | 0           | -3.785400               | 0.985900  | 1.469500  |
| 30            | 1             | 0           | -1.211700               | 4.227000  | 0.472200  |
| 31            | 1             | 0           | -0.142300               | 1.782100  | 1.425800  |
| 32            | 1             | 0           | -0.777600               | 1.286600  | -1.548400 |
| 33            | 1             | 0           | -3.187500               | 0.982000  | -1.136700 |
| 34            | 1             | 0           | -0.249800               | -1.962400 | 0.900200  |
| 35            | 1             | 0           | -1.056500               | -0.584200 | 1.631900  |
| 36            | 1             | 0           | -3.129500               | -1.650900 | 2.220900  |
| 37            | 1             | 0           | -5.247200               | -2.710600 | 1.538500  |
| 38            | 1             | 0           | -5.575800               | -3.459200 | -0.802800 |
| 39            | 1             | 0           | -3.760700               | -3.158000 | -2.466400 |
| 40            | 1             | 0           | -1.632600               | -2.100900 | -1.807100 |
| 41            | 1             | 0           | 1.509500                | -2.108600 | -0.595800 |
| 42            | 1             | 0           | 1.940800                | -0.968600 | -1.860300 |
| 43            | 1             | 0           | 2.959800                | -2.434800 | 1.411700  |
| 44            | 1             | 0           | 5.284000                | -2.428200 | 2.237200  |
| 45            | 1             | 0           | 7.033600                | -1.141200 | 1.040000  |
| 46            | 1             | 0           | 6.450200                | 0.147600  | -0.997400 |
| 47            | 1             | 0           | 4.130700                | 0.159800  | -1.840400 |

Distance matrix (angstroms):

|     | 1        | 2        | 3        | 4        | 5 |
|-----|----------|----------|----------|----------|---|
| 1 C | 0.000000 |          |          |          |   |
| 2 C | 1.342300 | 0.000000 |          |          |   |
| 3 C | 1.502831 | 2.275570 | 0.000000 |          |   |
| 4 C | 2.418833 | 2.779604 | 1.530191 | 0.000000 |   |

|    |   |           |           |          |          |          |  |  |  |  |  |
|----|---|-----------|-----------|----------|----------|----------|--|--|--|--|--|
| 5  | C | 2.968757  | 2.582662  | 2.379508 | 1.541626 | 0.000000 |  |  |  |  |  |
| 6  | C | 2.287271  | 1.500899  | 2.198400 | 2.381877 | 1.546912 |  |  |  |  |  |
| 7  | O | 2.225535  | 2.242191  | 1.461067 | 2.347078 | 2.235098 |  |  |  |  |  |
| 8  | C | 3.814937  | 4.234246  | 2.616846 | 1.487157 | 2.378935 |  |  |  |  |  |
| 9  | N | 4.061492  | 3.539534  | 3.683761 | 2.468006 | 1.458581 |  |  |  |  |  |
| 10 | O | 4.378885  | 5.030502  | 3.016229 | 2.412321 | 3.442578 |  |  |  |  |  |
| 11 | O | 4.779462  | 4.916145  | 3.763560 | 2.368923 | 2.613307 |  |  |  |  |  |
| 12 | C | 4.203358  | 3.477967  | 4.340423 | 3.298028 | 2.468507 |  |  |  |  |  |
| 13 | C | 4.637907  | 3.545187  | 4.990108 | 4.295270 | 3.139701 |  |  |  |  |  |
| 14 | C | 4.744315  | 3.585316  | 5.481169 | 5.049917 | 4.105924 |  |  |  |  |  |
| 15 | C | 5.676923  | 4.410176  | 6.470904 | 6.219370 | 5.150634 |  |  |  |  |  |
| 16 | C | 6.415328  | 5.089789  | 6.986398 | 6.710091 | 5.418180 |  |  |  |  |  |
| 17 | C | 6.359445  | 5.081921  | 6.633193 | 6.184462 | 4.749121 |  |  |  |  |  |
| 18 | C | 5.543132  | 4.385430  | 5.671750 | 5.006650 | 3.588716 |  |  |  |  |  |
| 19 | C | 4.753776  | 4.592581  | 4.141535 | 2.642137 | 2.406268 |  |  |  |  |  |
| 20 | H | 4.675672  | 4.662377  | 4.269835 | 2.775996 | 2.961600 |  |  |  |  |  |
| 21 | C | 6.253284  | 5.955761  | 5.624077 | 4.150203 | 3.670487 |  |  |  |  |  |
| 22 | C | 7.205659  | 7.101673  | 6.535620 | 5.013909 | 4.904020 |  |  |  |  |  |
| 23 | C | 7.703519  | 7.605398  | 7.249643 | 5.726603 | 5.714731 |  |  |  |  |  |
| 24 | C | 8.771118  | 8.801230  | 8.280754 | 6.777950 | 6.951562 |  |  |  |  |  |
| 25 | C | 9.338084  | 9.475900  | 8.651071 | 7.176943 | 7.448681 |  |  |  |  |  |
| 26 | C | 8.938424  | 9.084204  | 8.068911 | 6.628443 | 6.854418 |  |  |  |  |  |
| 27 | C | 7.893686  | 7.931535  | 7.006287 | 5.548511 | 5.595915 |  |  |  |  |  |
| 28 | H | 1.079425  | 2.173445  | 2.313401 | 3.197732 | 3.962152 |  |  |  |  |  |
| 29 | H | 2.170335  | 1.078870  | 3.333638 | 3.741605 | 3.397279 |  |  |  |  |  |
| 30 | H | 2.216798  | 3.239036  | 1.090169 | 2.270401 | 3.337767 |  |  |  |  |  |
| 31 | H | 2.495797  | 2.948103  | 2.167582 | 1.099548 | 2.239271 |  |  |  |  |  |
| 32 | H | 3.752274  | 3.419852  | 2.834951 | 2.159037 | 1.105637 |  |  |  |  |  |
| 33 | H | 3.224923  | 2.216837  | 3.193334 | 3.397108 | 2.264346 |  |  |  |  |  |
| 34 | H | 5.197825  | 4.542314  | 5.300953 | 4.109597 | 3.398563 |  |  |  |  |  |
| 35 | H | 3.578786  | 3.036853  | 3.962533 | 3.041014 | 2.677949 |  |  |  |  |  |
| 36 | H | 4.466765  | 3.489558  | 5.395607 | 5.003544 | 4.369579 |  |  |  |  |  |
| 37 | H | 6.090485  | 4.878987  | 7.067233 | 6.946588 | 6.009106 |  |  |  |  |  |
| 38 | H | 7.277361  | 5.939220  | 7.890567 | 7.715099 | 6.412534 |  |  |  |  |  |
| 39 | H | 7.191764  | 5.929465  | 7.330035 | 6.890448 | 5.387619 |  |  |  |  |  |
| 40 | H | 5.886866  | 4.856956  | 5.736362 | 4.923201 | 3.457669 |  |  |  |  |  |
| 41 | H | 6.578895  | 6.094684  | 6.160251 | 4.734527 | 4.036887 |  |  |  |  |  |
| 42 | H | 6.640299  | 6.299199  | 5.849143 | 4.475777 | 3.825069 |  |  |  |  |  |
| 43 | H | 7.469892  | 7.259359  | 7.220760 | 5.733592 | 5.614330 |  |  |  |  |  |
| 44 | H | 9.320918  | 9.347706  | 8.967156 | 7.489112 | 7.693598 |  |  |  |  |  |
| 45 | H | 10.253302 | 10.454819 | 9.568044 | 8.122728 | 8.480219 |  |  |  |  |  |
| 46 | H | 9.598369  | 9.816651  | 8.615168 | 7.245722 | 7.535847 |  |  |  |  |  |
| 47 | H | 7.811274  | 7.853777  | 6.771620 | 5.405547 | 5.391219 |  |  |  |  |  |
|    |   | 6         | 7         | 8        | 9        | 10       |  |  |  |  |  |
| 6  | C | 0.000000  |           |          |          |          |  |  |  |  |  |
| 7  | O | 1.481745  | 0.000000  |          |          |          |  |  |  |  |  |
| 8  | C | 3.567907  | 3.278147  | 0.000000 |          |          |  |  |  |  |  |
| 9  | N | 2.738917  | 3.686413  | 2.931752 | 0.000000 |          |  |  |  |  |  |
| 10 | O | 4.409462  | 3.732274  | 1.224251 | 4.137138 | 0.000000 |  |  |  |  |  |
| 11 | O | 4.104123  | 4.196429  | 1.366305 | 2.461769 | 2.271572 |  |  |  |  |  |
| 12 | C | 3.192214  | 4.439661  | 4.097400 | 1.469929 | 5.315709 |  |  |  |  |  |
| 13 | C | 3.259027  | 4.713964  | 5.246622 | 2.494782 | 6.433407 |  |  |  |  |  |
| 14 | C | 3.812653  | 5.268299  | 6.213477 | 3.711838 | 7.365452 |  |  |  |  |  |
| 15 | C | 4.598840  | 6.029559  | 7.398885 | 4.864545 | 8.523210 |  |  |  |  |  |
| 16 | C | 4.898782  | 6.296526  | 7.749538 | 5.109220 | 8.859834 |  |  |  |  |  |
| 17 | C | 4.504264  | 5.866644  | 7.020519 | 4.320978 | 8.125830 |  |  |  |  |  |
| 18 | C | 3.697540  | 5.080595  | 5.757300 | 2.963075 | 6.901316 |  |  |  |  |  |
| 19 | C | 3.907335  | 4.499644  | 2.435662 | 1.484392 | 3.570982 |  |  |  |  |  |
| 20 | H | 4.321648  | 4.920408  | 2.744445 | 2.137862 | 3.819552 |  |  |  |  |  |
| 21 | C | 5.140046  | 5.811099  | 3.707862 | 2.481524 | 4.689922 |  |  |  |  |  |
| 22 | C | 6.418623  | 6.951667  | 4.316647 | 3.816965 | 5.085685 |  |  |  |  |  |
| 23 | C | 7.152762  | 7.807529  | 5.232191 | 4.524933 | 6.035018 |  |  |  |  |  |

|    |   |          |           |          |           |           |
|----|---|----------|-----------|----------|-----------|-----------|
| 24 | C | 8.406461 | 8.956245  | 6.144197 | 5.847841  | 6.769497  |
| 25 | C | 8.963403 | 9.325956  | 6.280538 | 6.488165  | 6.688123  |
| 26 | C | 8.397808 | 8.630521  | 5.546472 | 6.023275  | 5.850416  |
| 27 | C | 7.142513 | 7.431034  | 4.514145 | 4.749697  | 4.980546  |
| 28 | H | 3.345376 | 3.223610  | 4.511529 | 4.931613  | 4.957663  |
| 29 | H | 2.306286 | 3.241035  | 5.207588 | 4.078119  | 6.063179  |
| 30 | H | 3.212305 | 2.121997  | 2.891848 | 4.622407  | 2.831646  |
| 31 | H | 3.014375 | 3.229610  | 2.089387 | 2.684866  | 2.991279  |
| 32 | H | 2.082716 | 2.335982  | 2.402947 | 2.003370  | 3.277711  |
| 33 | H | 1.090759 | 2.111922  | 4.430001 | 3.205160  | 5.254627  |
| 34 | H | 4.274708 | 5.481076  | 4.672035 | 2.117337  | 5.886958  |
| 35 | H | 3.207081 | 4.349664  | 4.054991 | 2.116841  | 5.217963  |
| 36 | H | 4.088182 | 5.445372  | 6.246331 | 4.036032  | 7.368739  |
| 37 | H | 5.323265 | 6.690490  | 8.211701 | 5.805127  | 9.310424  |
| 38 | H | 5.777824 | 7.112366  | 8.766871 | 6.166842  | 9.852073  |
| 39 | H | 5.177106 | 6.427256  | 7.596599 | 4.980171  | 8.654106  |
| 40 | H | 3.893734 | 5.115653  | 5.405171 | 2.706351  | 6.512857  |
| 41 | H | 5.355117 | 6.258015  | 4.569714 | 2.640038  | 5.640410  |
| 42 | H | 5.259940 | 5.821989  | 3.875221 | 2.839504  | 4.739629  |
| 43 | H | 6.936116 | 7.759354  | 5.519439 | 4.325827  | 6.457462  |
| 44 | H | 9.086869 | 9.705746  | 6.982753 | 6.554807  | 7.632602  |
| 45 | H | 9.988324 | 10.305691 | 7.194319 | 7.550464  | 7.502749  |
| 46 | H | 9.071579 | 9.164186  | 6.025261 | 6.830972  | 6.131194  |
| 47 | H | 6.912453 | 7.061961  | 4.230204 | 4.733297  | 4.567862  |
|    |   | 11       | 12        | 13       | 14        | 15        |
| 11 | O | 0.000000 |           |          |           |           |
| 12 | C | 3.707016 | 0.000000  |          |           |           |
| 13 | C | 4.947923 | 1.514135  | 0.000000 |           |           |
| 14 | C | 6.093123 | 2.524892  | 1.403101 | 0.000000  |           |
| 15 | C | 7.296135 | 3.814279  | 2.432122 | 1.396220  | 0.000000  |
| 16 | C | 7.543907 | 4.323566  | 2.809805 | 2.416623  | 1.393037  |
| 17 | C | 6.671762 | 3.828985  | 2.433140 | 2.787991  | 2.411844  |
| 18 | C | 5.328999 | 2.546749  | 1.404049 | 2.413450  | 2.786949  |
| 19 | C | 1.467382 | 2.445115  | 3.783922 | 4.946836  | 6.188077  |
| 20 | H | 2.063067 | 2.537965  | 4.038095 | 4.988996  | 6.329857  |
| 21 | C | 2.419864 | 3.218367  | 4.344151 | 5.618630  | 6.748117  |
| 22 | C | 3.019909 | 4.406135  | 5.662389 | 6.837942  | 8.031739  |
| 23 | C | 4.070101 | 4.701279  | 5.977312 | 6.976201  | 8.199805  |
| 24 | C | 5.050729 | 6.034606  | 7.340373 | 8.284338  | 9.524282  |
| 25 | C | 5.201849 | 6.936829  | 8.275093 | 9.316514  | 10.564213 |
| 26 | C | 4.434145 | 6.746909  | 8.058375 | 9.220914  | 10.442498 |
| 27 | C | 3.272395 | 5.587310  | 6.840977 | 8.067471  | 9.251758  |
| 28 | H | 5.520971 | 4.907381  | 5.381270 | 5.291909  | 6.216690  |
| 29 | H | 5.766917 | 3.639120  | 3.381543 | 3.009046  | 3.674571  |
| 30 | H | 4.210689 | 5.364054  | 6.075259 | 6.557172  | 7.535037  |
| 31 | H | 2.720836 | 3.100754  | 4.275416 | 4.875765  | 6.156083  |
| 32 | H | 2.539983 | 3.291196  | 3.822653 | 4.916431  | 5.823653  |
| 33 | H | 4.809073 | 3.588114  | 3.216073 | 3.750584  | 4.238880  |
| 34 | H | 4.014807 | 1.097634  | 2.095344 | 3.019400  | 4.250744  |
| 35 | H | 3.932463 | 1.097312  | 2.160823 | 2.633544  | 4.020874  |
| 36 | H | 6.229049 | 2.735825  | 2.169550 | 1.088706  | 2.144636  |
| 37 | H | 8.195402 | 4.680562  | 3.415855 | 2.156480  | 1.087654  |
| 38 | H | 8.584105 | 5.411048  | 3.897298 | 3.402340  | 2.153979  |
| 39 | H | 7.185024 | 4.701346  | 3.416757 | 3.875550  | 3.397537  |
| 40 | H | 4.811228 | 2.768840  | 2.168756 | 3.407149  | 3.875299  |
| 41 | H | 3.381477 | 2.923171  | 3.850632 | 5.089317  | 6.145452  |
| 42 | H | 2.588464 | 3.838054  | 4.740865 | 6.104731  | 7.112232  |
| 43 | H | 4.442594 | 4.164811  | 5.362188 | 6.237525  | 7.442147  |
| 44 | H | 5.959005 | 6.532631  | 7.802271 | 8.616823  | 9.846054  |
| 45 | H | 6.185045 | 7.968079  | 9.318633 | 10.323050 | 11.580395 |
| 46 | H | 5.008802 | 7.672768  | 8.974774 | 10.169643 | 11.382810 |
| 47 | H | 3.037220 | 5.797474  | 6.965194 | 8.259451  | 9.389868  |

|      | 16        | 17        | 18       | 19        | 20        |
|------|-----------|-----------|----------|-----------|-----------|
| 16 C | 0.000000  |           |          |           |           |
| 17 C | 1.392885  | 0.000000  |          |           |           |
| 18 C | 2.415807  | 1.396001  | 0.000000 |           |           |
| 19 C | 6.488707  | 5.665929  | 4.275118 | 0.000000  |           |
| 20 H | 6.841427  | 6.194631  | 4.816093 | 1.099198  | 0.000000  |
| 21 C | 6.849368  | 5.857306  | 4.509104 | 1.545373  | 2.180845  |
| 22 C | 8.227608  | 7.287275  | 5.945231 | 2.536018  | 2.668000  |
| 23 C | 8.541876  | 7.751231  | 6.442692 | 3.334981  | 3.033765  |
| 24 C | 9.907683  | 9.136972  | 7.835777 | 4.562306  | 4.161000  |
| 25 C | 10.874652 | 10.003593 | 8.675308 | 5.085898  | 4.833936  |
| 26 C | 10.638647 | 9.657937  | 8.321426 | 4.607299  | 4.616642  |
| 27 C | 9.380945  | 8.359769  | 7.026022 | 3.396230  | 3.634259  |
| 28 H | 7.104071  | 7.192279  | 6.410303 | 5.490776  | 5.228626  |
| 29 H | 4.520489  | 4.792582  | 4.303931 | 5.231122  | 5.225169  |
| 30 H | 8.048240  | 7.687110  | 6.731300 | 4.863964  | 4.952599  |
| 31 H | 6.836050  | 6.441198  | 5.231222 | 2.657504  | 2.344434  |
| 32 H | 5.854612  | 4.993962  | 3.897140 | 2.717998  | 3.538723  |
| 33 H | 4.273823  | 3.835661  | 3.287167 | 4.533736  | 5.084498  |
| 34 H | 4.724286  | 4.194576  | 2.939554 | 2.573525  | 2.521883  |
| 35 H | 4.817429  | 4.585037  | 3.433999 | 2.821966  | 2.534913  |
| 36 H | 3.394464  | 3.876416  | 3.408372 | 5.095909  | 4.908212  |
| 37 H | 2.152973  | 3.397275  | 3.874576 | 7.093856  | 7.131930  |
| 38 H | 1.087501  | 2.153853  | 3.401673 | 7.555980  | 7.927634  |
| 39 H | 2.153258  | 1.087590  | 2.156185 | 6.268309  | 6.916574  |
| 40 H | 3.394514  | 2.145607  | 1.088601 | 3.853804  | 4.585313  |
| 41 H | 6.213618  | 5.249243  | 3.960026 | 2.195686  | 2.651084  |
| 42 H | 7.015959  | 5.876839  | 4.605405 | 2.182319  | 3.077587  |
| 43 H | 7.859122  | 7.184685  | 5.927819 | 3.396608  | 2.966865  |
| 44 H | 10.313032 | 9.644565  | 8.385817 | 5.353601  | 4.810845  |
| 45 H | 11.920752 | 11.068918 | 9.745542 | 6.135198  | 5.822974  |
| 46 H | 11.536189 | 10.509062 | 9.180553 | 5.420915  | 5.500296  |
| 47 H | 9.413974  | 8.314193  | 7.011584 | 3.499028  | 3.990911  |
|      | 21        | 22        | 23       | 24        | 25        |
| 21 C | 0.000000  |           |          |           |           |
| 22 C | 1.513368  | 0.000000  |          |           |           |
| 23 C | 2.529656  | 1.402181  | 0.000000 |           |           |
| 24 C | 3.814433  | 2.427617  | 1.395649 | 0.000000  |           |
| 25 C | 4.316694  | 2.803510  | 2.416698 | 1.393635  | 0.000000  |
| 26 C | 3.816393  | 2.427443  | 2.789497 | 2.413423  | 1.393602  |
| 27 C | 2.532451  | 1.401587  | 2.416749 | 2.789204  | 2.416512  |
| 28 H | 7.012315  | 7.837979  | 8.203571 | 9.182830  | 9.776247  |
| 29 H | 6.500069  | 7.668391  | 8.042932 | 9.261609  | 10.055208 |
| 30 H | 6.328075  | 7.096768  | 7.841407 | 8.761048  | 8.999791  |
| 31 H | 4.192393  | 4.877131  | 5.333507 | 6.324929  | 6.852554  |
| 32 H | 3.711250  | 4.971677  | 5.995246 | 7.209242  | 7.542661  |
| 33 H | 5.554308  | 6.947523  | 7.729384 | 9.039756  | 9.610983  |
| 34 H | 2.884277  | 3.897512  | 3.963962 | 5.295936  | 6.317957  |
| 35 H | 3.880194  | 4.855214  | 4.995414 | 6.222452  | 7.153163  |
| 36 H | 5.913454  | 6.984774  | 6.976899 | 8.205654  | 9.284073  |
| 37 H | 7.718318  | 8.948510  | 9.024630 | 10.310484 | 11.399455 |
| 38 H | 7.874951  | 9.259501  | 9.572832 | 10.934835 | 11.907626 |
| 39 H | 6.290106  | 7.730046  | 8.287807 | 9.665309  | 10.459218 |
| 40 H | 3.849892  | 5.321423  | 5.984646 | 7.371186  | 8.092183  |
| 41 H | 1.097166  | 2.124677  | 2.659734 | 4.024362  | 4.775258  |
| 42 H | 1.098040  | 2.140586  | 3.378137 | 4.537871  | 4.796125  |
| 43 H | 2.746590  | 2.169719  | 1.088471 | 2.145575  | 3.395489  |
| 44 H | 4.684511  | 3.412428  | 2.156138 | 1.087706  | 2.153388  |
| 45 H | 5.404167  | 3.890996  | 3.402203 | 2.154362  | 1.087487  |
| 46 H | 4.686967  | 3.411932  | 3.877128 | 3.398831  | 2.153613  |
| 47 H | 2.749068  | 2.167851  | 3.409922 | 3.877655  | 3.396192  |
|      | 26        | 27        | 28       | 29        | 30        |

|    |   |           |           |           |           |          |  |  |  |
|----|---|-----------|-----------|-----------|-----------|----------|--|--|--|
| 26 | C | 0.000000  |           |           |           |          |  |  |  |
| 27 | C | 1.395651  | 0.000000  |           |           |          |  |  |  |
| 28 | H | 9.477295  | 8.532289  | 0.000000  |           |          |  |  |  |
| 29 | H | 9.765843  | 8.619475  | 2.646728  | 0.000000  |          |  |  |  |
| 30 | H | 8.365159  | 7.395762  | 2.672068  | 4.257143  | 0.000000 |  |  |  |
| 31 | H | 6.508487  | 5.550164  | 2.990818  | 3.729346  | 2.833815 |  |  |  |
| 32 | H | 6.766375  | 5.453826  | 4.784143  | 4.271417  | 3.594053 |  |  |  |
| 33 | H | 9.003624  | 7.686980  | 4.241369  | 2.673907  | 4.125817 |  |  |  |
| 34 | H | 6.282007  | 5.210043  | 5.822936  | 4.638647  | 6.278305 |  |  |  |
| 35 | H | 7.061639  | 6.009700  | 4.107065  | 3.152536  | 4.951428 |  |  |  |
| 36 | H | 9.296507  | 8.233762  | 4.814829  | 2.819135  | 6.425388 |  |  |  |
| 37 | H | 11.347231 | 10.194488 | 6.478960  | 3.975642  | 8.096453 |  |  |  |
| 38 | H | 11.666605 | 10.401929 | 7.936617  | 5.303564  | 8.930211 |  |  |  |
| 39 | H | 10.032892 | 8.714220  | 8.079038  | 5.715228  | 8.346915 |  |  |  |
| 40 | H | 7.623893  | 6.293627  | 6.826621  | 4.989889  | 6.739042 |  |  |  |
| 41 | H | 4.504473  | 3.342722  | 7.329677  | 6.471272  | 6.977491 |  |  |  |
| 42 | H | 4.028367  | 2.653384  | 7.495146  | 6.906302  | 6.509460 |  |  |  |
| 43 | H | 3.877810  | 3.410607  | 7.935457  | 7.563217  | 7.916038 |  |  |  |
| 44 | H | 3.398695  | 3.876910  | 9.647097  | 9.721083  | 9.465782 |  |  |  |
| 45 | H | 2.154272  | 3.402027  | 10.633293 | 11.034482 | 9.855199 |  |  |  |
| 46 | H | 1.087631  | 2.155900  | 10.140005 | 10.562000 | 8.803746 |  |  |  |
| 47 | H | 2.146819  | 1.088579  | 8.527136  | 8.619891  | 7.101512 |  |  |  |
|    |   | 31        | 32        | 33        | 34        | 35       |  |  |  |
| 31 | H | 0.000000  |           |           |           |          |  |  |  |
| 32 | H | 3.081394  | 0.000000  |           |           |          |  |  |  |
| 33 | H | 4.059533  | 2.463716  | 0.000000  |           |          |  |  |  |
| 34 | H | 3.782736  | 4.102465  | 4.631256  | 0.000000  |          |  |  |  |
| 35 | H | 2.545116  | 3.700268  | 3.828745  | 1.756583  | 0.000000 |  |  |  |
| 36 | H | 4.619636  | 5.326158  | 4.267201  | 3.183387  | 2.404600 |  |  |  |
| 37 | H | 6.801254  | 6.744174  | 5.003434  | 5.093254  | 4.700241 |  |  |  |
| 38 | H | 7.871519  | 6.789791  | 5.053684  | 5.788514  | 5.883661 |  |  |  |
| 39 | H | 7.255800  | 5.431029  | 4.385916  | 5.008979  | 5.543754 |  |  |  |
| 40 | H | 5.267858  | 3.503299  | 3.517303  | 3.043155  | 3.802498 |  |  |  |
| 41 | H | 4.685388  | 4.203053  | 5.648556  | 2.313985  | 3.724352 |  |  |  |
| 42 | H | 4.764883  | 3.545830  | 5.534248  | 3.661520  | 4.618120 |  |  |  |
| 43 | H | 5.235023  | 6.048071  | 7.480519  | 3.284254  | 4.427626 |  |  |  |
| 44 | H | 6.915904  | 8.054409  | 9.735450  | 5.712047  | 6.630887 |  |  |  |
| 45 | H | 7.758097  | 8.579561  | 10.663812 | 7.330882  | 8.130825 |  |  |  |
| 46 | H | 7.211418  | 7.337712  | 9.674755  | 7.276193  | 7.987446 |  |  |  |
| 47 | H | 5.617691  | 5.044438  | 7.397787  | 5.586000  | 6.286290 |  |  |  |
|    |   | 36        | 37        | 38        | 39        | 40       |  |  |  |
| 36 | H | 0.000000  |           |           |           |          |  |  |  |
| 37 | H | 2.464404  | 0.000000  |           |           |          |  |  |  |
| 38 | H | 4.289183  | 2.479933  | 0.000000  |           |          |  |  |  |
| 39 | H | 4.963924  | 4.295238  | 2.480499  | 0.000000  |          |  |  |  |
| 40 | H | 4.320647  | 4.962873  | 4.289805  | 2.465958  | 0.000000 |  |  |  |
| 41 | H | 5.446431  | 7.111303  | 7.215847  | 5.689938  | 3.367506 |  |  |  |
| 42 | H | 6.544438  | 8.139641  | 7.988784  | 6.137421  | 3.748883 |  |  |  |
| 43 | H | 6.192647  | 8.212612  | 8.877492  | 7.792804  | 5.618034 |  |  |  |
| 44 | H | 8.449346  | 10.558130 | 11.324302 | 10.220717 | 8.018905 |  |  |  |
| 45 | H | 10.244165 | 12.390705 | 12.952452 | 11.527326 | 9.172242 |  |  |  |
| 46 | H | 10.264634 | 12.305660 | 12.556733 | 10.832702 | 8.428702 |  |  |  |
| 47 | H | 8.513712  | 10.373098 | 10.411048 | 8.583348  | 6.190921 |  |  |  |
|    |   | 41        | 42        | 43        | 44        | 45       |  |  |  |
| 41 | H | 0.000000  |           |           |           |          |  |  |  |
| 42 | H | 1.756297  | 0.000000  |           |           |          |  |  |  |
| 43 | H | 2.497966  | 3.727477  | 0.000000  |           |          |  |  |  |
| 44 | H | 4.730210  | 5.486066  | 2.466455  | 0.000000  |          |  |  |  |
| 45 | H | 5.841865  | 5.863288  | 4.290386  | 2.480072  | 0.000000 |  |  |  |
| 46 | H | 5.446305  | 4.724954  | 4.965425  | 4.296208  | 2.480395 |  |  |  |
| 47 | H | 3.683118  | 2.463604  | 4.321934  | 4.965347  | 4.291402 |  |  |  |
|    |   | 46        | 47        |           |           |          |  |  |  |

46 H 0.000000  
47 H 2.467970 0.000000  
Stoichiometry C22H21NO3  
Framework group C1[X(C22H21NO3)]  
Deg. of freedom 135  
Full point group C1 NOp 1  
Largest Abelian subgroup C1 NOp 1  
Largest concise Abelian subgroup C1 NOp 1  
Standard orientation:

| Center<br>Number | Atomic<br>Number | Atomic<br>Type | Coordinates (Angstroms) |           |           |
|------------------|------------------|----------------|-------------------------|-----------|-----------|
|                  |                  |                | X                       | Y         | Z         |
| 1                | 6                | 0              | -2.453932               | 2.747906  | 1.460526  |
| 2                | 6                | 0              | -3.046515               | 1.652276  | 0.960314  |
| 3                | 6                | 0              | -1.478715               | 3.208456  | 0.413938  |
| 4                | 6                | 0              | -0.374152               | 2.150031  | 0.379871  |
| 5                | 6                | 0              | -1.009971               | 1.069441  | -0.517162 |
| 6                | 6                | 0              | -2.505244               | 1.455080  | -0.425629 |
| 7                | 8                | 0              | -2.293008               | 2.884079  | -0.755003 |
| 8                | 6                | 0              | 0.921458                | 2.439643  | -0.290319 |
| 9                | 7                | 0              | -0.332261               | -0.210038 | -0.340807 |
| 10               | 8                | 0              | 1.370216                | 3.556616  | -0.513433 |
| 11               | 8                | 0              | 1.590633                | 1.298958  | -0.633584 |
| 12               | 6                | 0              | -0.923478               | -1.088136 | 0.679045  |
| 13               | 6                | 0              | -2.228142               | -1.722159 | 0.244910  |
| 14               | 6                | 0              | -3.253727               | -1.920192 | 1.181740  |
| 15               | 6                | 0              | -4.454896               | -2.524085 | 0.804997  |
| 16               | 6                | 0              | -4.639004               | -2.953829 | -0.507244 |
| 17               | 6                | 0              | -3.619553               | -2.789178 | -1.441984 |
| 18               | 6                | 0              | -2.418083               | -2.185395 | -1.066839 |
| 19               | 6                | 0              | 1.113816                | 0.019334  | -0.096538 |
| 20               | 1                | 0              | 1.328864                | 0.041878  | 0.981183  |
| 21               | 6                | 0              | 1.946434                | -1.090277 | -0.777487 |
| 22               | 6                | 0              | 3.376404                | -1.110937 | -0.282471 |
| 23               | 6                | 0              | 3.715062                | -1.828475 | 0.873626  |
| 24               | 6                | 0              | 5.028469                | -1.827352 | 1.345643  |
| 25               | 6                | 0              | 6.013311                | -1.109555 | 0.669573  |
| 26               | 6                | 0              | 5.686648                | -0.392390 | -0.479815 |
| 27               | 6                | 0              | 4.374145                | -0.391529 | -0.954343 |
| 28               | 1                | 0              | -2.592617               | 3.176949  | 2.441264  |
| 29               | 1                | 0              | -3.780643               | 1.030337  | 1.448379  |
| 30               | 1                | 0              | -1.203073               | 4.263014  | 0.433884  |
| 31               | 1                | 0              | -0.136720               | 1.822626  | 1.402337  |
| 32               | 1                | 0              | -0.770671               | 1.310494  | -1.569332 |
| 33               | 1                | 0              | -3.181131               | 1.010701  | -1.157379 |
| 34               | 1                | 0              | -0.247652               | -1.924755 | 0.898427  |
| 35               | 1                | 0              | -1.053422               | -0.541522 | 1.621605  |
| 36               | 1                | 0              | -3.127857               | -1.602708 | 2.215492  |
| 37               | 1                | 0              | -5.246196               | -2.664236 | 1.537932  |
| 38               | 1                | 0              | -5.574094               | -3.426094 | -0.799186 |
| 39               | 1                | 0              | -3.757661               | -3.136378 | -2.463370 |
| 40               | 1                | 0              | -1.628910               | -2.077595 | -1.808888 |
| 41               | 1                | 0              | 1.512428                | -2.081402 | -0.595596 |
| 42               | 1                | 0              | 1.945657                | -0.949198 | -1.866426 |
| 43               | 1                | 0              | 2.961154                | -2.397386 | 1.414672  |
| 44               | 1                | 0              | 5.284847                | -2.388315 | 2.241576  |
| 45               | 1                | 0              | 7.036480                | -1.110042 | 1.038017  |
| 46               | 1                | 0              | 6.455639                | 0.167485  | -1.007199 |
| 47               | 1                | 0              | 4.136676                | 0.177108  | -1.851708 |

Rotational constants (GHZ): 0.3018662 0.1392353 0.1052621



Standard basis: 6-31G (6D, 7F)

There are 276 symmetry adapted basis functions of A symmetry.

Integral buffers will be 262144 words long.

Raffenetti 2 integral format.

Two-electron integral symmetry is turned on.

276 basis functions, 656 primitive gaussians, 276 cartesian basis functions

92 alpha electrons 92 beta electrons

nuclear repulsion energy 2294.5957155213 Hartrees.

NAtoms= 47 NActive= 47 NUniq= 47 SFac= 1.00D+00 NAtFMM= 60 Big=F

-----  
United Atom Topological Model (UA0 parameters set).

| Nord | Group | Hybr | Charge | Alpha | Radius                  | Bonded to |  |
|------|-------|------|--------|-------|-------------------------|-----------|--|
| 1    | CH *  | 0.00 | 1.00   | 2.125 | C2 [d] C3 [s]           |           |  |
| 2    | CH *  | 0.00 | 1.00   | 2.125 | C1 [d] C6 [s]           |           |  |
| 3    | CH *  | 0.00 | 1.00   | 2.125 | C1 [s] C4 [s] O7 [s]    |           |  |
| 4    | CH *  | 0.00 | 1.00   | 2.125 | C3 [s] C5 [s] C8 [s]    |           |  |
| 5    | CH *  | 0.00 | 1.00   | 2.125 | C4 [s] C6 [s] N9 [s]    |           |  |
| 6    | CH *  | 0.00 | 1.00   | 2.125 | C2 [s] C5 [s] O7 [s]    |           |  |
| 7    | O *   | 0.00 | 1.00   | 1.750 | C3 [s] C6 [s]           |           |  |
| 8    | C *   | 0.00 | 1.00   | 1.925 | C4 [s] O10 [d] O11 [s]  |           |  |
| 9    | N *   | 0.00 | 1.00   | 1.830 | C5 [s] C12 [s] C19 [s]  |           |  |
| 10   | O *   | 0.00 | 1.00   | 1.750 | C8 [d]                  |           |  |
| 11   | O *   | 0.00 | 1.00   | 1.750 | C8 [s] C19 [s]          |           |  |
| 12   | CH2 * | 0.00 | 1.00   | 2.325 | N9 [s] C13 [s]          |           |  |
| 13   | C *   | 0.00 | 1.00   | 1.925 | C12 [s] C14 [s] C18 [s] |           |  |
| 14   | CH *  | 0.00 | 1.00   | 2.125 | C13 [s] C15 [s]         |           |  |
| 15   | CH *  | 0.00 | 1.00   | 2.125 | C14 [s] C16 [s]         |           |  |
| 16   | CH *  | 0.00 | 1.00   | 2.125 | C15 [s] C17 [s]         |           |  |
| 17   | CH *  | 0.00 | 1.00   | 2.125 | C16 [s] C18 [s]         |           |  |
| 18   | CH *  | 0.00 | 1.00   | 2.125 | C13 [s] C17 [s]         |           |  |
| 19   | CH *  | 0.00 | 1.00   | 2.125 | N9 [s] O11 [s] C21 [s]  |           |  |
| 21   | CH2 * | 0.00 | 1.00   | 2.325 | C19 [s] C22 [s]         |           |  |
| 22   | C *   | 0.00 | 1.00   | 1.925 | C21 [s] C23 [s] C27 [s] |           |  |
| 23   | CH *  | 0.00 | 1.00   | 2.125 | C22 [s] C24 [s]         |           |  |
| 24   | CH *  | 0.00 | 1.00   | 2.125 | C23 [s] C25 [s]         |           |  |
| 25   | CH *  | 0.00 | 1.00   | 2.125 | C24 [s] C26 [s]         |           |  |
| 26   | CH *  | 0.00 | 1.00   | 2.125 | C25 [s] C27 [s]         |           |  |
| 27   | CH *  | 0.00 | 1.00   | 2.125 | C22 [s] C26 [s]         |           |  |

-----  
Polarizable Continuum Model (PCM)

Model : PCM.

Atomic radii : UA0 (Simple United Atom Topological Model).

Polarization charges : Total charges.

Charge compensation : None.

Solution method : Matrix inversion.

Cavity : GePol (RMin=0.200 OFac=0.890).

Default sphere list used, NSphG= 26.

Tesseræ with average area of 0.200 Ang\*\*2.

Solvent : Methanol, Eps= 32.630000.

-----  
One-electron integrals computed using PRISM.

NBasis= 276 RedAO= T NBF= 276

NBsUse= 276 1.00D-06 NBFU= 276

Harris functional with IExCor= 402 diagonalized for initial guess.

ExpMin= 1.61D-01 ExpMax= 5.48D+03 ExpMxC= 8.25D+02 IAcc=1 IRadAn= 1 AccDes= 1.00D-06

HarFok: IExCor= 402 AccDes= 1.00D-06 IRadAn= 1 IDoV=1

ScaDFX= 1.000000 1.000000 1.000000 1.000000

Initial guess orbital symmetries:

Occupied (A) (A)

(A) (A) (A) (A) (A) (A) (A) (A) (A) (A) (A)

(A) (A) (A) (A) (A) (A) (A) (A) (A) (A) (A)



|    |     |       |        |       |      |       |
|----|-----|-------|--------|-------|------|-------|
| 14 | C14 | 10.07 | -0.024 | -0.60 | 1.35 | -1.00 |
| 15 | C15 | 16.52 | -0.018 | -0.55 | 1.69 | -1.51 |
| 16 | C16 | 17.26 | -0.014 | -0.51 | 1.69 | -1.55 |
| 17 | C17 | 16.91 | -0.017 | -0.50 | 1.69 | -1.57 |
| 18 | C18 | 8.78  | -0.002 | -0.16 | 1.43 | -0.92 |
| 19 | C19 | 1.62  | -0.024 | -0.45 | 0.53 | -0.24 |
| 20 | C21 | 14.28 | -0.042 | -0.27 | 1.87 | -1.43 |
| 21 | C22 | 0.12  | 0.001  | 0.00  | 0.09 | 0.00  |
| 22 | C23 | 12.77 | -0.007 | -0.54 | 1.58 | -1.23 |
| 23 | C24 | 17.55 | -0.013 | -0.55 | 1.69 | -1.59 |
| 24 | C25 | 17.56 | -0.011 | -0.51 | 1.69 | -1.54 |
| 25 | C26 | 17.55 | -0.013 | -0.48 | 1.69 | -1.59 |
| 26 | C27 | 11.11 | -0.014 | -0.30 | 1.52 | -1.12 |

Added spheres: 94.29 0.124 -4.16 0.00 0.00

-----

\*\*\*\*\*

Population analysis using the SCF density.

\*\*\*\*\*

Orbital symmetries:

Occupied (A)  
(A) (A) (A) (A) (A) (A) (A) (A) (A) (A) (A) (A) (A)  
(A) (A) (A) (A) (A) (A) (A) (A) (A) (A) (A) (A) (A)  
(A) (A) (A) (A) (A) (A) (A) (A) (A) (A) (A) (A) (A)  
(A) (A) (A) (A) (A) (A) (A) (A) (A) (A) (A) (A) (A)  
(A) (A) (A) (A) (A) (A) (A) (A) (A) (A) (A) (A) (A)  
(A) (A) (A) (A) (A) (A) (A) (A) (A) (A) (A) (A) (A)  
(A) (A) (A) (A) (A) (A) (A) (A) (A) (A) (A) (A) (A)

Virtual (A)  
(A) (A) (A) (A) (A) (A) (A) (A) (A) (A) (A) (A) (A)  
(A) (A) (A) (A) (A) (A) (A) (A) (A) (A) (A) (A) (A)  
(A) (A) (A) (A) (A) (A) (A) (A) (A) (A) (A) (A) (A)  
(A) (A) (A) (A) (A) (A) (A) (A) (A) (A) (A) (A) (A)  
(A) (A) (A) (A) (A) (A) (A) (A) (A) (A) (A) (A) (A)  
(A) (A) (A) (A) (A) (A) (A) (A) (A) (A) (A) (A) (A)  
(A) (A) (A) (A) (A) (A) (A) (A) (A) (A) (A) (A) (A)  
(A) (A) (A) (A) (A) (A) (A) (A) (A) (A) (A) (A) (A)  
(A) (A) (A) (A) (A) (A) (A) (A) (A) (A) (A) (A) (A)  
(A) (A) (A) (A) (A) (A) (A) (A) (A) (A) (A) (A) (A)  
(A) (A) (A) (A) (A) (A) (A) (A) (A) (A) (A) (A) (A)  
(A) (A) (A) (A) (A) (A) (A) (A) (A) (A) (A) (A) (A)  
(A) (A) (A) (A) (A) (A) (A) (A) (A) (A) (A) (A) (A)  
(A) (A) (A) (A) (A) (A) (A) (A) (A) (A) (A) (A) (A)  
(A) (A) (A) (A) (A) (A) (A) (A) (A) (A) (A) (A) (A)  
(A) (A) (A) (A) (A) (A) (A) (A) (A) (A) (A) (A) (A)  
(A) (A) (A) (A) (A) (A) (A) (A) (A) (A) (A) (A) (A)  
(A) (A) (A) (A) (A) (A) (A) (A) (A) (A) (A) (A) (A)  
(A) (A) (A) (A) (A) (A) (A) (A) (A) (A) (A) (A) (A)  
(A) (A) (A) (A) (A) (A) (A) (A) (A) (A) (A) (A) (A)  
(A) (A) (A) (A) (A) (A) (A) (A) (A) (A) (A) (A) (A)

The electronic state is 1-A.

Alpha occ. eigenvalues -- -19.20629 -19.15509 -19.15057 -14.34333 -10.33810  
Alpha occ. eigenvalues -- -10.29097 -10.25077 -10.24641 -10.23312 -10.21825  
Alpha occ. eigenvalues -- -10.20897 -10.19638 -10.19314 -10.19061 -10.18923  
Alpha occ. eigenvalues -- -10.18804 -10.18397 -10.18326 -10.18293 -10.18270  
Alpha occ. eigenvalues -- -10.18225 -10.18184 -10.18177 -10.18128 -10.18080  
Alpha occ. eigenvalues -- -10.18065 -1.12778 -1.06701 -1.05215 -0.94696  
Alpha occ. eigenvalues -- -0.86051 -0.85816 -0.82888 -0.79805 -0.78698  
Alpha occ. eigenvalues -- -0.76823 -0.75801 -0.74505 -0.74453 -0.72175  
Alpha occ. eigenvalues -- -0.68465 -0.65423 -0.65235 -0.60650 -0.60429  
Alpha occ. eigenvalues -- -0.59844 -0.58539 -0.57644 -0.56313 -0.55602  
Alpha occ. eigenvalues -- -0.54597 -0.53051 -0.51333 -0.50727 -0.50162  
Alpha occ. eigenvalues -- -0.49560 -0.46919 -0.46125 -0.45793 -0.45142  
Alpha occ. eigenvalues -- -0.44900 -0.44431 -0.43788 -0.42962 -0.41973  
Alpha occ. eigenvalues -- -0.41865 -0.41597 -0.41199 -0.40588 -0.40033

Alpha occ. eigenvalues -- -0.39695 -0.39115 -0.38488 -0.37835 -0.36786  
Alpha occ. eigenvalues -- -0.35910 -0.35747 -0.34697 -0.34494 -0.33951  
Alpha occ. eigenvalues -- -0.33696 -0.33567 -0.33184 -0.31823 -0.28299  
Alpha occ. eigenvalues -- -0.28028 -0.25125 -0.25021 -0.24854 -0.24438  
Alpha occ. eigenvalues -- -0.24290 -0.21928  
Alpha virt. eigenvalues -- -0.01311 -0.00622 -0.00030 0.00163 0.00315  
Alpha virt. eigenvalues -- 0.00588 0.07880 0.09253 0.09513 0.09739  
Alpha virt. eigenvalues -- 0.10256 0.10845 0.12101 0.12612 0.13428  
Alpha virt. eigenvalues -- 0.13717 0.14261 0.15153 0.15551 0.15839  
Alpha virt. eigenvalues -- 0.16286 0.16506 0.16918 0.17554 0.17628  
Alpha virt. eigenvalues -- 0.18058 0.18491 0.18848 0.19287 0.20210  
Alpha virt. eigenvalues -- 0.20590 0.20874 0.21280 0.22104 0.23146  
Alpha virt. eigenvalues -- 0.23784 0.24681 0.24894 0.26443 0.26768  
Alpha virt. eigenvalues -- 0.28347 0.28896 0.31489 0.31560 0.31599  
Alpha virt. eigenvalues -- 0.32777 0.32921 0.34090 0.34874 0.34951  
Alpha virt. eigenvalues -- 0.35486 0.35937 0.36618 0.37626 0.42270  
Alpha virt. eigenvalues -- 0.48549 0.48795 0.49113 0.51071 0.52368  
Alpha virt. eigenvalues -- 0.52793 0.53201 0.54223 0.54520 0.55011  
Alpha virt. eigenvalues -- 0.55441 0.56443 0.56770 0.57490 0.57522  
Alpha virt. eigenvalues -- 0.58275 0.58878 0.59039 0.59606 0.59993  
Alpha virt. eigenvalues -- 0.60322 0.61531 0.62231 0.62660 0.62758  
Alpha virt. eigenvalues -- 0.63211 0.63875 0.64356 0.64757 0.64804  
Alpha virt. eigenvalues -- 0.64956 0.65323 0.65703 0.66143 0.66222  
Alpha virt. eigenvalues -- 0.66977 0.67166 0.67362 0.67546 0.68661  
Alpha virt. eigenvalues -- 0.70365 0.71047 0.71668 0.72849 0.74765  
Alpha virt. eigenvalues -- 0.75764 0.75978 0.76458 0.78436 0.80246  
Alpha virt. eigenvalues -- 0.82061 0.83679 0.83767 0.84925 0.85243  
Alpha virt. eigenvalues -- 0.85469 0.85765 0.86154 0.86767 0.87208  
Alpha virt. eigenvalues -- 0.87390 0.87616 0.88157 0.88967 0.89606  
Alpha virt. eigenvalues -- 0.90777 0.91592 0.92198 0.93063 0.93568  
Alpha virt. eigenvalues -- 0.94043 0.94620 0.95367 0.95790 0.97440  
Alpha virt. eigenvalues -- 0.97832 0.99064 0.99603 1.00285 1.00688  
Alpha virt. eigenvalues -- 1.01635 1.02857 1.03909 1.05096 1.05619  
Alpha virt. eigenvalues -- 1.06252 1.07055 1.08008 1.09261 1.10450  
Alpha virt. eigenvalues -- 1.12743 1.13211 1.15886 1.16123 1.16988  
Alpha virt. eigenvalues -- 1.18538 1.19505 1.20008 1.20593 1.22773  
Alpha virt. eigenvalues -- 1.23114 1.23767 1.25394 1.28398 1.29727  
Alpha virt. eigenvalues -- 1.33251 1.35369 1.39732 1.41457 1.42372  
Alpha virt. eigenvalues -- 1.46105 1.46689 1.48918 1.51726 1.52301  
Alpha virt. eigenvalues -- 1.55149 1.56182 1.60828 1.68362 1.69449  
Alpha virt. eigenvalues -- 1.79741 1.83535 1.90400 1.91627 1.92268  
Alpha virt. eigenvalues -- 2.00010 2.05460 2.14171 2.53137

Condensed to atoms (all electrons):

|      | 1         | 2         | 3         | 4         | 5         | 6         |
|------|-----------|-----------|-----------|-----------|-----------|-----------|
| 1 C  | 5.076060  | 0.634794  | 0.279079  | -0.050980 | -0.019000 | -0.057823 |
| 2 C  | 0.634794  | 5.097455  | -0.047691 | -0.040374 | -0.036488 | 0.265841  |
| 3 C  | 0.279079  | -0.047691 | 5.362654  | 0.090672  | -0.049214 | -0.139129 |
| 4 C  | -0.050980 | -0.040374 | 0.090672  | 6.184215  | 0.154732  | -0.013361 |
| 5 C  | -0.019000 | -0.036488 | -0.049214 | 0.154732  | 5.439305  | 0.177480  |
| 6 C  | -0.057823 | 0.265841  | -0.139129 | -0.013361 | 0.177480  | 5.363513  |
| 7 O  | -0.090889 | -0.108146 | 0.210187  | -0.103860 | -0.070790 | 0.198416  |
| 8 C  | 0.005753  | 0.001533  | -0.002695 | 0.092563  | -0.028592 | 0.001744  |
| 9 N  | -0.000163 | -0.001232 | 0.010119  | -0.056562 | 0.124817  | -0.012397 |
| 10 O | 0.000134  | -0.000017 | 0.005704  | -0.121203 | 0.001651  | -0.000253 |
| 11 O | -0.000148 | -0.000032 | 0.004931  | -0.145516 | 0.017682  | 0.000429  |
| 12 C | -0.000521 | 0.001900  | -0.000042 | -0.004964 | -0.052294 | -0.009996 |
| 13 C | 0.000085  | 0.000476  | 0.000025  | -0.001075 | -0.003766 | 0.002726  |
| 14 C | 0.000079  | -0.001492 | 0.000005  | 0.000019  | 0.000434  | 0.000131  |
| 15 C | 0.000003  | -0.000292 | 0.000000  | 0.000000  | 0.000004  | -0.000011 |
| 16 C | 0.000000  | -0.000010 | 0.000000  | 0.000000  | 0.000000  | -0.000045 |
| 17 C | 0.000000  | -0.000011 | 0.000000  | 0.000003  | -0.000042 | -0.000321 |
| 18 C | -0.000004 | -0.000142 | -0.000006 | 0.000160  | -0.000994 | 0.000249  |

|    |   |           |           |           |           |           |           |
|----|---|-----------|-----------|-----------|-----------|-----------|-----------|
| 19 | C | -0.000171 | -0.000003 | 0.000461  | -0.005047 | -0.044969 | 0.003623  |
| 20 | H | -0.000044 | -0.000062 | -0.000307 | 0.001836  | 0.000559  | 0.000197  |
| 21 | C | 0.000000  | 0.000001  | 0.000020  | -0.000758 | 0.001922  | -0.000144 |
| 22 | C | 0.000000  | 0.000000  | -0.000001 | 0.000035  | -0.000124 | 0.000002  |
| 23 | C | 0.000000  | 0.000000  | 0.000000  | 0.000000  | -0.000002 | 0.000000  |
| 24 | C | 0.000000  | 0.000000  | 0.000000  | 0.000000  | 0.000000  | 0.000000  |
| 25 | C | 0.000000  | 0.000000  | 0.000000  | 0.000000  | 0.000000  | 0.000000  |
| 26 | C | 0.000000  | 0.000000  | 0.000000  | 0.000000  | 0.000000  | 0.000000  |
| 27 | C | 0.000000  | 0.000000  | 0.000000  | 0.000010  | 0.000003  | 0.000000  |
| 28 | H | 0.354352  | -0.028499 | -0.032067 | 0.003271  | -0.000128 | 0.005897  |
| 29 | H | -0.025712 | 0.355451  | 0.005575  | -0.000217 | 0.002259  | -0.031186 |
| 30 | H | -0.030133 | 0.002803  | 0.383243  | -0.042162 | 0.000932  | 0.008490  |
| 31 | H | -0.004432 | 0.002908  | -0.025428 | 0.360920  | -0.026267 | -0.004638 |
| 32 | H | 0.000686  | 0.007224  | -0.000588 | -0.084057 | 0.422948  | -0.056270 |
| 33 | H | 0.003355  | -0.039410 | 0.006201  | 0.006956  | -0.041785 | 0.388362  |
| 34 | H | 0.000012  | 0.000033  | 0.000014  | -0.000209 | 0.005226  | 0.000263  |
| 35 | H | 0.000729  | 0.002424  | -0.000957 | 0.007395  | -0.004112 | 0.001059  |
| 36 | H | 0.000010  | -0.000034 | -0.000002 | 0.000006  | -0.000014 | -0.000001 |
| 37 | H | 0.000000  | -0.000003 | 0.000000  | 0.000000  | 0.000000  | -0.000001 |
| 38 | H | 0.000000  | 0.000000  | 0.000000  | 0.000000  | 0.000000  | 0.000000  |
| 39 | H | 0.000000  | 0.000000  | 0.000000  | 0.000000  | 0.000000  | -0.000001 |
| 40 | H | 0.000000  | -0.000011 | -0.000002 | 0.000070  | 0.000482  | -0.000149 |
| 41 | H | 0.000000  | 0.000000  | 0.000000  | 0.000031  | 0.000310  | 0.000002  |
| 42 | H | 0.000000  | 0.000000  | -0.000001 | 0.000016  | 0.000044  | 0.000001  |
| 43 | H | 0.000000  | 0.000000  | 0.000000  | 0.000000  | 0.000002  | 0.000000  |
| 44 | H | 0.000000  | 0.000000  | 0.000000  | 0.000000  | 0.000000  | 0.000000  |
| 45 | H | 0.000000  | 0.000000  | 0.000000  | 0.000000  | 0.000000  | 0.000000  |
| 46 | H | 0.000000  | 0.000000  | 0.000000  | 0.000000  | 0.000000  | 0.000000  |
| 47 | H | 0.000000  | 0.000000  | 0.000000  | 0.000007  | 0.000000  | 0.000000  |
|    |   | 7         | 8         | 9         | 10        | 11        | 12        |
| 1  | C | -0.090889 | 0.005753  | -0.000163 | 0.000134  | -0.000148 | -0.000521 |
| 2  | C | -0.108146 | 0.001533  | -0.001232 | -0.000017 | -0.000032 | 0.001900  |
| 3  | C | 0.210187  | -0.002695 | 0.010119  | 0.005704  | 0.004931  | -0.000042 |
| 4  | C | -0.103860 | 0.092563  | -0.056562 | -0.121203 | -0.145516 | -0.004964 |
| 5  | C | -0.070790 | -0.028592 | 0.124817  | 0.001651  | 0.017682  | -0.052294 |
| 6  | C | 0.198416  | 0.001744  | -0.012397 | -0.000253 | 0.000429  | -0.009996 |
| 7  | O | 8.464022  | 0.003760  | 0.004384  | -0.000093 | -0.000032 | 0.000013  |
| 8  | C | 0.003760  | 4.741601  | -0.015457 | 0.571313  | 0.106760  | 0.000755  |
| 9  | N | 0.004384  | -0.015457 | 7.410319  | -0.000069 | -0.048951 | 0.224479  |
| 10 | O | -0.000093 | 0.571313  | -0.000069 | 8.087295  | -0.091164 | 0.000002  |
| 11 | O | -0.000032 | 0.106760  | -0.048951 | -0.091164 | 8.616992  | 0.001571  |
| 12 | C | 0.000013  | 0.000755  | 0.224479  | 0.000002  | 0.001571  | 5.181416  |
| 13 | C | 0.000028  | -0.000084 | -0.061791 | 0.000000  | -0.000090 | 0.261950  |
| 14 | C | 0.000008  | 0.000000  | 0.001178  | 0.000000  | 0.000000  | -0.037896 |
| 15 | C | 0.000000  | 0.000000  | -0.000114 | 0.000000  | 0.000000  | 0.006313  |
| 16 | C | 0.000000  | 0.000000  | -0.000009 | 0.000000  | 0.000000  | 0.000412  |
| 17 | C | 0.000000  | 0.000000  | 0.000573  | 0.000000  | 0.000000  | 0.006169  |
| 18 | C | 0.000016  | -0.000002 | 0.001756  | 0.000000  | -0.000002 | -0.055632 |
| 19 | C | -0.000166 | -0.010817 | 0.157873  | 0.000970  | 0.143445  | -0.026938 |
| 20 | H | 0.000003  | -0.003241 | -0.071663 | 0.000125  | -0.047715 | -0.000570 |
| 21 | C | 0.000001  | 0.001257  | -0.051735 | -0.000086 | -0.045050 | -0.003042 |
| 22 | C | 0.000000  | 0.000187  | 0.005507  | 0.000007  | -0.002178 | -0.000152 |
| 23 | C | 0.000000  | -0.000003 | 0.000070  | 0.000000  | -0.000239 | -0.000033 |
| 24 | C | 0.000000  | -0.000001 | 0.000002  | 0.000000  | 0.000007  | 0.000000  |
| 25 | C | 0.000000  | 0.000000  | 0.000000  | 0.000000  | 0.000001  | 0.000000  |
| 26 | C | 0.000000  | -0.000003 | 0.000001  | 0.000000  | -0.000007 | 0.000000  |
| 27 | C | 0.000000  | 0.000122  | 0.000025  | -0.000003 | 0.003906  | -0.000006 |
| 28 | H | 0.004159  | -0.000108 | -0.000008 | 0.000002  | 0.000000  | 0.000007  |
| 29 | H | 0.002912  | 0.000003  | -0.000021 | 0.000000  | 0.000000  | -0.000170 |
| 30 | H | -0.023174 | 0.000459  | -0.000100 | 0.005567  | 0.000163  | -0.000004 |
| 31 | H | 0.003195  | -0.031713 | -0.006713 | 0.000761  | 0.000137  | 0.002551  |
| 32 | H | 0.005306  | 0.002532  | -0.061219 | 0.000243  | 0.000968  | 0.006158  |



|      |           |           |           |           |           |           |
|------|-----------|-----------|-----------|-----------|-----------|-----------|
| 47 H | 0.000000  | 0.000000  | 0.000000  | 0.000000  | 0.000000  | 0.000000  |
|      | 19        | 20        | 21        | 22        | 23        | 24        |
| 1 C  | -0.000171 | -0.000044 | 0.000000  | 0.000000  | 0.000000  | 0.000000  |
| 2 C  | -0.000003 | -0.000062 | 0.000001  | 0.000000  | 0.000000  | 0.000000  |
| 3 C  | 0.000461  | -0.000307 | 0.000020  | -0.000001 | 0.000000  | 0.000000  |
| 4 C  | -0.005047 | 0.001836  | -0.000758 | 0.000035  | 0.000000  | 0.000000  |
| 5 C  | -0.044969 | 0.000559  | 0.001922  | -0.000124 | -0.000002 | 0.000000  |
| 6 C  | 0.003623  | 0.000197  | -0.000144 | 0.000002  | 0.000000  | 0.000000  |
| 7 O  | -0.000166 | 0.000003  | 0.000001  | 0.000000  | 0.000000  | 0.000000  |
| 8 C  | -0.010817 | -0.003241 | 0.001257  | 0.000187  | -0.000003 | -0.000001 |
| 9 N  | 0.157873  | -0.071663 | -0.051735 | 0.005507  | 0.000070  | 0.000002  |
| 10 O | 0.000970  | 0.000125  | -0.000086 | 0.000007  | 0.000000  | 0.000000  |
| 11 O | 0.143445  | -0.047715 | -0.045050 | -0.002178 | -0.000239 | 0.000007  |
| 12 C | -0.026938 | -0.000570 | -0.003042 | -0.000152 | -0.000033 | 0.000000  |
| 13 C | 0.005487  | -0.000273 | -0.000399 | -0.000021 | 0.000002  | 0.000000  |
| 14 C | -0.000109 | 0.000023  | -0.000004 | 0.000000  | 0.000000  | 0.000000  |
| 15 C | 0.000001  | 0.000000  | 0.000000  | 0.000000  | 0.000000  | 0.000000  |
| 16 C | 0.000000  | 0.000000  | 0.000000  | 0.000000  | 0.000000  | 0.000000  |
| 17 C | -0.000002 | 0.000000  | 0.000001  | 0.000000  | 0.000000  | 0.000000  |
| 18 C | 0.000050  | 0.000044  | 0.000062  | 0.000004  | 0.000000  | 0.000000  |
| 19 C | 5.000939  | 0.384717  | 0.271489  | -0.039955 | -0.005240 | -0.000016 |
| 20 H | 0.384717  | 0.593622  | -0.076416 | 0.006807  | 0.005356  | -0.000248 |
| 21 C | 0.271489  | -0.076416 | 5.356494  | 0.236662  | -0.049791 | 0.006073  |
| 22 C | -0.039955 | 0.006807  | 0.236662  | 4.921798  | 0.523695  | -0.041420 |
| 23 C | -0.005240 | 0.005356  | -0.049791 | 0.523695  | 5.008082  | 0.512012  |
| 24 C | -0.000016 | -0.000248 | 0.006073  | -0.041420 | 0.512012  | 4.936076  |
| 25 C | 0.000026  | 0.000003  | 0.000409  | -0.031571 | -0.059374 | 0.538827  |
| 26 C | -0.000025 | -0.000035 | 0.006015  | -0.043966 | -0.040589 | -0.049327 |
| 27 C | -0.003965 | 0.000594  | -0.040877 | 0.537831  | -0.058894 | -0.039366 |
| 28 H | 0.000000  | -0.000001 | 0.000000  | 0.000000  | 0.000000  | 0.000000  |
| 29 H | 0.000002  | -0.000001 | 0.000000  | 0.000000  | 0.000000  | 0.000000  |
| 30 H | -0.000013 | 0.000008  | 0.000000  | 0.000000  | 0.000000  | 0.000000  |
| 31 H | -0.000171 | 0.003133  | 0.000041  | 0.000007  | -0.000003 | 0.000000  |
| 32 H | -0.002782 | -0.000466 | 0.000612  | -0.000066 | 0.000000  | 0.000000  |
| 33 H | -0.000088 | 0.000007  | -0.000001 | 0.000000  | 0.000000  | 0.000000  |
| 34 H | 0.000025  | -0.002121 | 0.002386  | -0.000734 | 0.000173  | 0.000003  |
| 35 H | -0.005586 | 0.009113  | -0.000529 | 0.000122  | -0.000011 | 0.000000  |
| 36 H | 0.000000  | 0.000007  | -0.000001 | 0.000000  | 0.000000  | 0.000000  |
| 37 H | 0.000000  | 0.000000  | 0.000000  | 0.000000  | 0.000000  | 0.000000  |
| 38 H | 0.000000  | 0.000000  | 0.000000  | 0.000000  | 0.000000  | 0.000000  |
| 39 H | 0.000000  | 0.000000  | 0.000000  | 0.000000  | 0.000000  | 0.000000  |
| 40 H | -0.000427 | 0.000051  | 0.000149  | 0.000017  | 0.000000  | 0.000000  |
| 41 H | -0.031655 | 0.000224  | 0.366950  | -0.041639 | -0.003798 | 0.000321  |
| 42 H | -0.026952 | 0.005140  | 0.353878  | -0.033433 | 0.004061  | -0.000247 |
| 43 H | 0.000178  | 0.001170  | -0.005966 | -0.040964 | 0.357256  | -0.032372 |
| 44 H | -0.000001 | 0.000002  | -0.000168 | 0.003906  | -0.031121 | 0.355293  |
| 45 H | 0.000000  | 0.000000  | 0.000002  | 0.000405  | 0.004895  | -0.034888 |
| 46 H | -0.000001 | 0.000000  | -0.000168 | 0.004028  | 0.000704  | 0.004345  |
| 47 H | 0.000077  | 0.000115  | -0.007274 | -0.036620 | 0.004791  | 0.000300  |
|      | 25        | 26        | 27        | 28        | 29        | 30        |
| 1 C  | 0.000000  | 0.000000  | 0.000000  | 0.354352  | -0.025712 | -0.030133 |
| 2 C  | 0.000000  | 0.000000  | 0.000000  | -0.028499 | 0.355451  | 0.002803  |
| 3 C  | 0.000000  | 0.000000  | 0.000000  | -0.032067 | 0.005575  | 0.383243  |
| 4 C  | 0.000000  | 0.000000  | 0.000010  | 0.003271  | -0.000217 | -0.042162 |
| 5 C  | 0.000000  | 0.000000  | 0.000003  | -0.000128 | 0.002259  | 0.000932  |
| 6 C  | 0.000000  | 0.000000  | 0.000000  | 0.005897  | -0.031186 | 0.008490  |
| 7 O  | 0.000000  | 0.000000  | 0.000000  | 0.004159  | 0.002912  | -0.023174 |
| 8 C  | 0.000000  | -0.000003 | 0.000122  | -0.000108 | 0.000003  | 0.000459  |
| 9 N  | 0.000000  | 0.000001  | 0.000025  | -0.000008 | -0.000021 | -0.000100 |
| 10 O | 0.000000  | 0.000000  | -0.000003 | 0.000002  | 0.000000  | 0.005567  |
| 11 O | 0.000001  | -0.000007 | 0.003906  | 0.000000  | 0.000000  | 0.000163  |
| 12 C | 0.000000  | 0.000000  | -0.000006 | 0.000007  | -0.000170 | -0.000004 |





|    |   |           |           |           |           |           |           |
|----|---|-----------|-----------|-----------|-----------|-----------|-----------|
| 27 | C | 0.000000  | 0.000003  | 0.000000  | 0.000000  | 0.000000  | 0.000000  |
| 28 | H | 0.001031  | 0.000009  | -0.000113 | 0.000000  | -0.000002 | 0.000000  |
| 29 | H | -0.000111 | -0.000073 | -0.001203 | 0.000011  | -0.000001 | 0.000896  |
| 30 | H | 0.002204  | -0.000253 | -0.000043 | 0.000000  | 0.000011  | 0.000000  |
| 31 | H | 0.477561  | 0.003625  | -0.000041 | -0.000252 | 0.003620  | 0.000000  |
| 32 | H | 0.003625  | 0.547088  | -0.006820 | -0.000176 | -0.000407 | -0.000001 |
| 33 | H | -0.000041 | -0.006820 | 0.518406  | 0.000000  | 0.000266  | 0.000010  |
| 34 | H | -0.000252 | -0.000176 | 0.000000  | 0.557006  | -0.039532 | 0.000181  |
| 35 | H | 0.003620  | -0.000407 | 0.000266  | -0.039532 | 0.620692  | 0.005757  |
| 36 | H | 0.000000  | -0.000001 | 0.000010  | 0.000181  | 0.005757  | 0.555282  |
| 37 | H | 0.000000  | 0.000000  | 0.000000  | 0.000003  | -0.000002 | -0.003827 |
| 38 | H | 0.000000  | 0.000000  | 0.000000  | 0.000000  | 0.000000  | -0.000159 |
| 39 | H | 0.000000  | 0.000000  | 0.000001  | 0.000002  | 0.000002  | 0.000011  |
| 40 | H | 0.000001  | -0.000190 | 0.000244  | -0.000002 | 0.000395  | -0.000139 |
| 41 | H | -0.000002 | 0.000004  | 0.000000  | 0.004406  | 0.000010  | 0.000000  |
| 42 | H | 0.000003  | 0.000042  | 0.000001  | -0.000038 | 0.000009  | 0.000000  |
| 43 | H | -0.000001 | 0.000000  | 0.000000  | 0.000656  | 0.000007  | 0.000000  |
| 44 | H | 0.000000  | 0.000000  | 0.000000  | 0.000000  | 0.000000  | 0.000000  |
| 45 | H | 0.000000  | 0.000000  | 0.000000  | 0.000000  | 0.000000  | 0.000000  |
| 46 | H | 0.000000  | 0.000000  | 0.000000  | 0.000000  | 0.000000  | 0.000000  |
| 47 | H | 0.000000  | -0.000001 | 0.000000  | 0.000000  | 0.000000  | 0.000000  |
|    |   | 37        | 38        | 39        | 40        | 41        | 42        |
| 1  | C | 0.000000  | 0.000000  | 0.000000  | 0.000000  | 0.000000  | 0.000000  |
| 2  | C | -0.000003 | 0.000000  | 0.000000  | -0.000011 | 0.000000  | 0.000000  |
| 3  | C | 0.000000  | 0.000000  | 0.000000  | -0.000002 | 0.000000  | -0.000001 |
| 4  | C | 0.000000  | 0.000000  | 0.000000  | 0.000070  | 0.000031  | 0.000016  |
| 5  | C | 0.000000  | 0.000000  | 0.000000  | 0.000482  | 0.000310  | 0.000044  |
| 6  | C | -0.000001 | 0.000000  | -0.000001 | -0.000149 | 0.000002  | 0.000001  |
| 7  | O | 0.000000  | 0.000000  | 0.000000  | 0.000000  | 0.000000  | 0.000000  |
| 8  | C | 0.000000  | 0.000000  | 0.000000  | 0.000000  | -0.000058 | 0.000051  |
| 9  | N | 0.000001  | 0.000000  | 0.000002  | 0.011752  | -0.003017 | 0.000650  |
| 10 | O | 0.000000  | 0.000000  | 0.000000  | 0.000000  | 0.000001  | -0.000010 |
| 11 | O | 0.000000  | 0.000000  | 0.000000  | 0.000000  | 0.002759  | -0.002310 |
| 12 | C | -0.000176 | 0.000004  | -0.000175 | -0.008157 | 0.000164  | 0.000204  |
| 13 | C | 0.003710  | 0.000452  | 0.003621  | -0.039457 | -0.000319 | 0.000012  |
| 14 | C | -0.030720 | 0.004793  | 0.000749  | 0.005235  | -0.000001 | 0.000000  |
| 15 | C | 0.355673  | -0.034537 | 0.004315  | 0.000307  | 0.000000  | 0.000000  |
| 16 | C | -0.034310 | 0.357665  | -0.034524 | 0.004573  | 0.000000  | 0.000000  |
| 17 | C | 0.004295  | -0.034716 | 0.356894  | -0.035621 | 0.000002  | 0.000000  |
| 18 | C | 0.000736  | 0.004643  | -0.031528 | 0.355051  | 0.000193  | -0.000048 |
| 19 | C | 0.000000  | 0.000000  | 0.000000  | -0.000427 | -0.031655 | -0.026952 |
| 20 | H | 0.000000  | 0.000000  | 0.000000  | 0.000051  | 0.000224  | 0.005140  |
| 21 | C | 0.000000  | 0.000000  | 0.000000  | 0.000149  | 0.366950  | 0.353878  |
| 22 | C | 0.000000  | 0.000000  | 0.000000  | 0.000017  | -0.041639 | -0.033433 |
| 23 | C | 0.000000  | 0.000000  | 0.000000  | 0.000000  | -0.003798 | 0.004061  |
| 24 | C | 0.000000  | 0.000000  | 0.000000  | 0.000000  | 0.000321  | -0.000247 |
| 25 | C | 0.000000  | 0.000000  | 0.000000  | 0.000000  | 0.000001  | 0.000014  |
| 26 | C | 0.000000  | 0.000000  | 0.000000  | 0.000000  | -0.000223 | 0.000252  |
| 27 | C | 0.000000  | 0.000000  | 0.000000  | 0.000000  | 0.003448  | -0.003977 |
| 28 | H | 0.000000  | 0.000000  | 0.000000  | 0.000000  | 0.000000  | 0.000000  |
| 29 | H | 0.000011  | 0.000000  | 0.000000  | -0.000002 | 0.000000  | 0.000000  |
| 30 | H | 0.000000  | 0.000000  | 0.000000  | 0.000000  | 0.000000  | 0.000000  |
| 31 | H | 0.000000  | 0.000000  | 0.000000  | 0.000001  | -0.000002 | 0.000003  |
| 32 | H | 0.000000  | 0.000000  | 0.000000  | -0.000190 | 0.000004  | 0.000042  |
| 33 | H | 0.000000  | 0.000000  | 0.000001  | 0.000244  | 0.000000  | 0.000001  |
| 34 | H | 0.000003  | 0.000000  | 0.000002  | -0.000002 | 0.004406  | -0.000038 |
| 35 | H | -0.000002 | 0.000000  | 0.000002  | 0.000395  | 0.000010  | 0.000009  |
| 36 | H | -0.003827 | -0.000159 | 0.000011  | -0.000139 | 0.000000  | 0.000000  |
| 37 | H | 0.554513  | -0.004073 | -0.000167 | 0.000011  | 0.000000  | 0.000000  |
| 38 | H | -0.004073 | 0.557857  | -0.004021 | -0.000155 | 0.000000  | 0.000000  |
| 39 | H | -0.000167 | -0.004021 | 0.554103  | -0.003849 | 0.000000  | 0.000000  |
| 40 | H | 0.000011  | -0.000155 | -0.003849 | 0.557611  | 0.000271  | 0.000219  |

|    |   |          |          |          |          |           |           |
|----|---|----------|----------|----------|----------|-----------|-----------|
| 41 | H | 0.000000 | 0.000000 | 0.000000 | 0.000271 | 0.554033  | -0.028360 |
| 42 | H | 0.000000 | 0.000000 | 0.000000 | 0.000219 | -0.028360 | 0.559673  |
| 43 | H | 0.000000 | 0.000000 | 0.000000 | 0.000000 | 0.002958  | 0.000126  |
| 44 | H | 0.000000 | 0.000000 | 0.000000 | 0.000000 | -0.000002 | 0.000002  |
| 45 | H | 0.000000 | 0.000000 | 0.000000 | 0.000000 | 0.000000  | 0.000000  |
| 46 | H | 0.000000 | 0.000000 | 0.000000 | 0.000000 | 0.000003  | -0.000004 |
| 47 | H | 0.000000 | 0.000000 | 0.000000 | 0.000000 | 0.000109  | 0.004342  |

|    |   |           |           |           |           |           |          |
|----|---|-----------|-----------|-----------|-----------|-----------|----------|
|    |   | 43        | 44        | 45        | 46        | 47        |          |
| 1  | C | 0.000000  | 0.000000  | 0.000000  | 0.000000  | 0.000000  | 0.000000 |
| 2  | C | 0.000000  | 0.000000  | 0.000000  | 0.000000  | 0.000000  | 0.000000 |
| 3  | C | 0.000000  | 0.000000  | 0.000000  | 0.000000  | 0.000000  | 0.000000 |
| 4  | C | 0.000000  | 0.000000  | 0.000000  | 0.000000  | 0.000000  | 0.000007 |
| 5  | C | 0.000002  | 0.000000  | 0.000000  | 0.000000  | 0.000000  | 0.000000 |
| 6  | C | 0.000000  | 0.000000  | 0.000000  | 0.000000  | 0.000000  | 0.000000 |
| 7  | O | 0.000000  | 0.000000  | 0.000000  | 0.000000  | 0.000000  | 0.000000 |
| 8  | C | 0.000000  | 0.000000  | 0.000000  | 0.000000  | 0.000114  |          |
| 9  | N | -0.000065 | 0.000000  | 0.000000  | 0.000000  | -0.000005 |          |
| 10 | O | 0.000000  | 0.000000  | 0.000000  | 0.000000  | 0.000003  |          |
| 11 | O | 0.000000  | 0.000000  | 0.000000  | -0.000001 | 0.001903  |          |
| 12 | C | 0.000013  | 0.000000  | 0.000000  | 0.000000  | 0.000000  |          |
| 13 | C | -0.000004 | 0.000000  | 0.000000  | 0.000000  | 0.000000  |          |
| 14 | C | 0.000000  | 0.000000  | 0.000000  | 0.000000  | 0.000000  |          |
| 15 | C | 0.000000  | 0.000000  | 0.000000  | 0.000000  | 0.000000  |          |
| 16 | C | 0.000000  | 0.000000  | 0.000000  | 0.000000  | 0.000000  |          |
| 17 | C | 0.000000  | 0.000000  | 0.000000  | 0.000000  | 0.000000  |          |
| 18 | C | 0.000000  | 0.000000  | 0.000000  | 0.000000  | 0.000000  |          |
| 19 | C | 0.000178  | -0.000001 | 0.000000  | -0.000001 | 0.000077  |          |
| 20 | H | 0.001170  | 0.000002  | 0.000000  | 0.000000  | 0.000115  |          |
| 21 | C | -0.005966 | -0.000168 | 0.000002  | -0.000168 | -0.007274 |          |
| 22 | C | -0.040964 | 0.003906  | 0.000405  | 0.004028  | -0.036620 |          |
| 23 | C | 0.357256  | -0.031121 | 0.004895  | 0.000704  | 0.004791  |          |
| 24 | C | -0.032372 | 0.355293  | -0.034888 | 0.004345  | 0.000300  |          |
| 25 | C | 0.004487  | -0.034371 | 0.357822  | -0.034926 | 0.004601  |          |
| 26 | C | 0.000365  | 0.004324  | -0.034925 | 0.355214  | -0.034948 |          |
| 27 | C | 0.004408  | 0.000720  | 0.004747  | -0.030633 | 0.356966  |          |
| 28 | H | 0.000000  | 0.000000  | 0.000000  | 0.000000  | 0.000000  |          |
| 29 | H | 0.000000  | 0.000000  | 0.000000  | 0.000000  | 0.000000  |          |
| 30 | H | 0.000000  | 0.000000  | 0.000000  | 0.000000  | 0.000000  |          |
| 31 | H | -0.000001 | 0.000000  | 0.000000  | 0.000000  | 0.000000  |          |
| 32 | H | 0.000000  | 0.000000  | 0.000000  | 0.000000  | -0.000001 |          |
| 33 | H | 0.000000  | 0.000000  | 0.000000  | 0.000000  | 0.000000  |          |
| 34 | H | 0.000656  | 0.000000  | 0.000000  | 0.000000  | 0.000000  |          |
| 35 | H | 0.000007  | 0.000000  | 0.000000  | 0.000000  | 0.000000  |          |
| 36 | H | 0.000000  | 0.000000  | 0.000000  | 0.000000  | 0.000000  |          |
| 37 | H | 0.000000  | 0.000000  | 0.000000  | 0.000000  | 0.000000  |          |
| 38 | H | 0.000000  | 0.000000  | 0.000000  | 0.000000  | 0.000000  |          |
| 39 | H | 0.000000  | 0.000000  | 0.000000  | 0.000000  | 0.000000  |          |
| 40 | H | 0.000000  | 0.000000  | 0.000000  | 0.000000  | 0.000000  |          |
| 41 | H | 0.002958  | -0.000002 | 0.000000  | 0.000003  | 0.000109  |          |
| 42 | H | 0.000126  | 0.000002  | 0.000000  | -0.000004 | 0.004342  |          |
| 43 | H | 0.559495  | -0.003887 | -0.000162 | 0.000012  | -0.000149 |          |
| 44 | H | -0.003887 | 0.556382  | -0.004103 | -0.000167 | 0.000011  |          |
| 45 | H | -0.000162 | -0.004103 | 0.558945  | -0.004113 | -0.000158 |          |
| 46 | H | 0.000012  | -0.000167 | -0.004113 | 0.556481  | -0.003991 |          |
| 47 | H | -0.000149 | 0.000011  | -0.000158 | -0.003991 | 0.555977  |          |

Mulliken atomic charges:

|   |   |           |
|---|---|-----------|
| 1 | C | -0.075112 |
| 2 | C | -0.068893 |
| 3 | C | -0.060759 |
| 4 | C | -0.232573 |
| 5 | C | 0.027787  |

6 C -0.092699  
7 O -0.477304  
8 C 0.562038  
9 N -0.458891  
10 O -0.460881  
11 O -0.518167  
12 C -0.226346  
13 C 0.089853  
14 C -0.180473  
15 C -0.153921  
16 C -0.147046  
17 C -0.154890  
18 C -0.152066  
19 C 0.235737  
20 H 0.190306  
21 C -0.322016  
22 C 0.071821  
23 C -0.171999  
24 C -0.155373  
25 C -0.147483  
26 C -0.158113  
27 C -0.154071  
28 H 0.183717  
29 H 0.178900  
30 H 0.186382  
31 H 0.238142  
32 H 0.215576  
33 H 0.185471  
34 H 0.182251  
35 H 0.148621  
36 H 0.155902  
37 H 0.154326  
38 H 0.152249  
39 H 0.154565  
40 H 0.151724  
41 H 0.172877  
42 H 0.166640  
43 H 0.152435  
44 H 0.153179  
45 H 0.151533  
46 H 0.153216  
47 H 0.153829

Sum of Mulliken charges= 0.00000

Atomic charges with hydrogens summed into heavy atoms:

1  
1 C 0.108605  
2 C 0.110007  
3 C 0.125623  
4 C 0.005568  
5 C 0.243364  
6 C 0.092772  
7 O -0.477304  
8 C 0.562038  
9 N -0.458891  
10 O -0.460881  
11 O -0.518167  
12 C 0.104526  
13 C 0.089853  
14 C -0.024571  
15 C 0.000405  
16 C 0.005202  
17 C -0.000325

18 C -0.000342  
19 C 0.426043  
20 H 0.000000  
21 C 0.017502  
22 C 0.071821  
23 C -0.019564  
24 C -0.002194  
25 C 0.004050  
26 C -0.004896  
27 C -0.000242  
28 H 0.000000  
29 H 0.000000  
30 H 0.000000  
31 H 0.000000  
32 H 0.000000  
33 H 0.000000  
34 H 0.000000  
35 H 0.000000  
36 H 0.000000  
37 H 0.000000  
38 H 0.000000  
39 H 0.000000  
40 H 0.000000  
41 H 0.000000  
42 H 0.000000  
43 H 0.000000  
44 H 0.000000  
45 H 0.000000  
46 H 0.000000  
47 H 0.000000

Sum of Mulliken charges= 0.00000

Electronic spatial extent (au):  $\langle R^2 \rangle = 10099.9502$

Charge= 0.0000 electrons

Dipole moment (field-independent basis, Debye):

X= -2.5632 Y= -5.7256 Z= 4.9850 Tot= 8.0126

Quadrupole moment (field-independent basis, Debye-Ang):

XX= -144.0866 YY= -169.9834 ZZ= -140.7681

XY= -1.3302 XZ= -2.0459 YZ= 10.2315

Traceless Quadrupole moment (field-independent basis, Debye-Ang):

XX= 7.5261 YY= -18.3707 ZZ= 10.8446

XY= -1.3302 XZ= -2.0459 YZ= 10.2315

Octapole moment (field-independent basis, Debye-Ang<sup>2</sup>):

XXX= 7.2580 YYY= -37.2529 ZZZ= 0.6482 XYY= -29.4925

XXY= -50.7240 XXZ= 28.2844 XZZ= -10.4443 YZZ= -1.3863

YYZ= 42.5976 XYZ= -30.4090

Hexadecapole moment (field-independent basis, Debye-Ang<sup>3</sup>):

XXXX= -8334.0345 YYYY= -4086.9590 ZZZZ= -805.3031 XXXY= 260.3736

XXXZ= 22.4200 YYYX= -66.9169 YYYZ= 146.9666 ZZZX= -12.6718

ZZZY= 12.3257 XXYY= -2240.8021 XXZZ= -1546.3230 YYZZ= -722.5379

XXYZ= -32.2193 YYXZ= 25.2345 ZZXY= 5.0258

N-N= 2.294595715521D+03 E-N=-7.221647732981D+03 KE= 1.125392772119D+03

Test job not archived.

1|1|UNPC-UNK|SP|RB3LYP|6-31G|C22H21N1O3|PCUSER|18-Jul-2011|0|# RB3LYP  
/6-31G SCRF=(PCM,SOLVENT=METHANOL) TEST|[No Title]|0,1|C,0,-2.4604,2  
.7047,1.4908|C,0,-3.0522,1.6114,0.9846|C,0,-1.4863,3.1723,0.4463|C,0,-  
0.3807,2.1152,0.4054|C,0,-1.016,1.0392,-0.4975|C,0,-2.5116,1.4228,-0.4  
028|O,0,-2.301,2.8539,-0.724|C,0,0.9142,2.41,-0.2639|N,0,-0.3369,-0.24  
06,-0.329|O,0,1.3617,3.5287,-0.4808|O,0,1.5843,1.272,-0.6142|C,0,-0.92  
66,-1.1252,0.6861|C,0,-2.2309,-1.758,0.2491|C,0,-3.2557,-1.9625,1.1854  
|C,0,-4.4565,-2.5654,0.8059|C,0,-4.641,-2.9877,-0.5087|C,0,-3.6223,-2.  
8166,-1.4431|C,0,-2.4212,-2.2138,-1.0652|C,0,1.1091,-0.0112,-0.0843|H,

0,1.3248,0.0053,0.9934|C,0,1.9424,-1.116,-0.7722|C,0,3.3727,-1.1381,-0.2782|C,0,3.7128,-1.862,0.8735|C,0,5.0265,-1.8623,1.3447|C,0,6.0102,-1.1396,0.6722|C,0,5.6821,-0.4161,-0.4728|C,0,4.3693,-0.4138,-0.9465|H,0,-2.5989,3.1279,2.4741|H,0,-3.7854,0.9859,1.4695|H,0,-1.2117,4.227,0.4722|H,0,-0.1423,1.7821,1.4258|H,0,-0.7776,1.2866,-1.5484|H,0,-3.1875,0.982,-1.1367|H,0,-0.2498,-1.9624,0.9002|H,0,-1.0565,-0.5842,1.6319|H,0,-3.1295,-1.6509,2.2209|H,0,-5.2472,-2.7106,1.5385|H,0,-5.5758,-3.4592,-0.8028|H,0,-3.7607,-3.158,-2.4664|H,0,-1.6326,-2.1009,-1.8071|H,0,1.5095,-2.1086,-0.5958|H,0,1.9408,-0.9686,-1.8603|H,0,2.9598,-2.4348,1.4117|H,0,5.284,-2.4282,2.2372|H,0,7.0336,-1.1412,1.04|H,0,6.4502,0.1476,-0.9974|H,0,4.1307,0.1598,-1.8404||Version=x86-Win32-G03RevB.03|State=1-A|HF=-1131.0273409|RMSD=1.332e-008|Dipole=-1.0049508,-2.2649857,1.948757|PG=C01 [X(C22H21N1O3)]||@

### INTERMEDIATE 15i\_b

%mem=256MB

-----  
# RB3LYP/6-31G SCRF=(PCM,Solvent=Methanol) Test  
-----

1/38=1/1;  
2/17=6,18=5,40=1/2;  
3/5=1,6=6,11=2,16=1,25=1,30=1,70=2201,72=3,74=-5/1,2,3;  
4/7=1/1;  
5/5=2,32=1,38=5,53=3/2;  
6/7=2,8=2,9=2,10=2,28=1/1;  
99/5=1,9=1/99;  
-----

[No Title]  
-----

Symbolic Z-matrix:

Charge = 0 Multiplicity = 1

|   |   |         |         |         |
|---|---|---------|---------|---------|
| C | 0 | -0.2907 | 1.7476  | 2.432   |
| C | 0 | -1.4188 | 1.2517  | 1.9003  |
| C | 0 | 0.3746  | 2.528   | 1.3329  |
| C | 0 | 0.8264  | 1.494   | 0.3017  |
| C | 0 | -0.4637 | 1.2474  | -0.4983 |
| C | 0 | -1.5114 | 1.7877  | 0.5025  |
| O | 0 | -0.8337 | 3.0821  | 0.7322  |
| C | 0 | 1.8357  | 1.8568  | -0.7178 |
| N | 0 | -0.3018 | -0.0928 | -1.0417 |
| O | 0 | 2.6461  | 2.7695  | -0.6061 |
| O | 0 | 1.8108  | 1.05    | -1.8123 |
| C | 0 | -1.4955 | -0.5742 | -1.7609 |
| C | 0 | -2.675  | -0.8702 | -0.8629 |
| C | 0 | -2.5497 | -1.7464 | 0.2253  |
| C | 0 | -3.6456 | -2.0261 | 1.0432  |
| C | 0 | -4.8813 | -1.4403 | 0.7775  |
| C | 0 | -5.024  | -0.5804 | -0.3094 |
| C | 0 | -3.9292 | -0.3008 | -1.1295 |
| C | 0 | 0.8822  | -0.0875 | -1.948  |
| H | 0 | 0.5269  | 0.0224  | -2.9811 |
| C | 0 | 1.7021  | -1.3991 | -1.8896 |
| C | 0 | 2.4074  | -1.6438 | -0.5744 |
| C | 0 | 1.7711  | -2.3504 | 0.4543  |
| C | 0 | 2.4083  | -2.5432 | 1.6808  |
| C | 0 | 3.6892  | -2.0364 | 1.8895  |
| C | 0 | 4.3363  | -1.3401 | 0.8708  |
| C | 0 | 3.7004  | -1.1458 | -0.3562 |
| H | 0 | 0.1145  | 1.5435  | 3.411   |
| H | 0 | -2.123  | 0.5807  | 2.3669  |
| H | 0 | 1.0683  | 3.3102  | 1.6419  |
| H | 0 | 1.2212  | 0.6109  | 0.8229  |

|   |   |         |         |         |
|---|---|---------|---------|---------|
| H | 0 | -0.5251 | 1.9435  | -1.3546 |
| H | 0 | -2.5161 | 1.973   | 0.1223  |
| H | 0 | -1.7838 | 0.1448  | -2.5395 |
| H | 0 | -1.2642 | -1.5145 | -2.2788 |
| H | 0 | -1.5921 | -2.2111 | 0.4468  |
| H | 0 | -3.5346 | -2.7019 | 1.8878  |
| H | 0 | -5.7351 | -1.6587 | 1.4145  |
| H | 0 | -5.9911 | -0.1301 | -0.5213 |
| H | 0 | -4.0662 | 0.3676  | -1.9776 |
| H | 0 | 1.0611  | -2.2587 | -2.1225 |
| H | 0 | 2.4638  | -1.3734 | -2.6805 |
| H | 0 | 0.7711  | -2.7519 | 0.3093  |
| H | 0 | 1.9043  | -3.0899 | 2.4744  |
| H | 0 | 4.1853  | -2.1885 | 2.8452  |
| H | 0 | 5.3387  | -0.9503 | 1.0318  |
| H | 0 | 4.2229  | -0.6004 | -1.1401 |

Input orientation:

| Center Number | Atomic Number | Atomic Type | Coordinates (Angstroms) |           |           |
|---------------|---------------|-------------|-------------------------|-----------|-----------|
|               |               |             | X                       | Y         | Z         |
| 1             | 6             | 0           | -0.290700               | 1.747600  | 2.432000  |
| 2             | 6             | 0           | -1.418800               | 1.251700  | 1.900300  |
| 3             | 6             | 0           | 0.374600                | 2.528000  | 1.332900  |
| 4             | 6             | 0           | 0.826400                | 1.494000  | 0.301700  |
| 5             | 6             | 0           | -0.463700               | 1.247400  | -0.498300 |
| 6             | 6             | 0           | -1.511400               | 1.787700  | 0.502500  |
| 7             | 8             | 0           | -0.833700               | 3.082100  | 0.732200  |
| 8             | 6             | 0           | 1.835700                | 1.856800  | -0.717800 |
| 9             | 7             | 0           | -0.301800               | -0.092800 | -1.041700 |
| 10            | 8             | 0           | 2.646100                | 2.769500  | -0.606100 |
| 11            | 8             | 0           | 1.810800                | 1.050000  | -1.812300 |
| 12            | 6             | 0           | -1.495500               | -0.574200 | -1.760900 |
| 13            | 6             | 0           | -2.675000               | -0.870200 | -0.862900 |
| 14            | 6             | 0           | -2.549700               | -1.746400 | 0.225300  |
| 15            | 6             | 0           | -3.645600               | -2.026100 | 1.043200  |
| 16            | 6             | 0           | -4.881300               | -1.440300 | 0.777500  |
| 17            | 6             | 0           | -5.024000               | -0.580400 | -0.309400 |
| 18            | 6             | 0           | -3.929200               | -0.300800 | -1.129500 |
| 19            | 6             | 0           | 0.882200                | -0.087500 | -1.948000 |
| 20            | 1             | 0           | 0.526900                | 0.022400  | -2.981100 |
| 21            | 6             | 0           | 1.702100                | -1.399100 | -1.889600 |
| 22            | 6             | 0           | 2.407400                | -1.643800 | -0.574400 |
| 23            | 6             | 0           | 1.771100                | -2.350400 | 0.454300  |
| 24            | 6             | 0           | 2.408300                | -2.543200 | 1.680800  |
| 25            | 6             | 0           | 3.689200                | -2.036400 | 1.889500  |
| 26            | 6             | 0           | 4.336300                | -1.340100 | 0.870800  |
| 27            | 6             | 0           | 3.700400                | -1.145800 | -0.356200 |
| 28            | 1             | 0           | 0.114500                | 1.543500  | 3.411000  |
| 29            | 1             | 0           | -2.123000               | 0.580700  | 2.366900  |
| 30            | 1             | 0           | 1.068300                | 3.310200  | 1.641900  |
| 31            | 1             | 0           | 1.221200                | 0.610900  | 0.822900  |
| 32            | 1             | 0           | -0.525100               | 1.943500  | -1.354600 |
| 33            | 1             | 0           | -2.516100               | 1.973000  | 0.122300  |
| 34            | 1             | 0           | -1.783800               | 0.144800  | -2.539500 |
| 35            | 1             | 0           | -1.264200               | -1.514500 | -2.278800 |
| 36            | 1             | 0           | -1.592100               | -2.211100 | 0.446800  |
| 37            | 1             | 0           | -3.534600               | -2.701900 | 1.887800  |
| 38            | 1             | 0           | -5.735100               | -1.658700 | 1.414500  |
| 39            | 1             | 0           | -5.991100               | -0.130100 | -0.521300 |
| 40            | 1             | 0           | -4.066200               | 0.367600  | -1.977600 |

|    |   |   |          |           |           |
|----|---|---|----------|-----------|-----------|
| 41 | 1 | 0 | 1.061100 | -2.258700 | -2.122500 |
| 42 | 1 | 0 | 2.463800 | -1.373400 | -2.680500 |
| 43 | 1 | 0 | 0.771100 | -2.751900 | 0.309300  |
| 44 | 1 | 0 | 1.904300 | -3.089900 | 2.474400  |
| 45 | 1 | 0 | 4.185300 | -2.188500 | 2.845200  |
| 46 | 1 | 0 | 5.338700 | -0.950300 | 1.031800  |
| 47 | 1 | 0 | 4.222900 | -0.600400 | -1.140100 |

-----  
Distance matrix (angstroms):

|      | 1        | 2        | 3        | 4        | 5        |
|------|----------|----------|----------|----------|----------|
| 1 C  | 0.000000 |          |          |          |          |
| 2 C  | 1.342100 | 0.000000 |          |          |          |
| 3 C  | 1.503220 | 2.273141 | 0.000000 |          |          |
| 4 C  | 2.418761 | 2.766795 | 1.528611 | 0.000000 |          |
| 5 C  | 2.977715 | 2.581766 | 2.386625 | 1.537911 | 0.000000 |
| 6 C  | 2.283569 | 1.499905 | 2.189658 | 2.364718 | 1.546351 |
| 7 O  | 2.228241 | 2.248814 | 1.458717 | 2.337375 | 2.239901 |
| 8 C  | 3.801939 | 4.220470 | 2.605896 | 1.479760 | 2.388889 |
| 9 N  | 3.931131 | 3.422095 | 3.600671 | 2.365479 | 1.455208 |
| 10 O | 4.347312 | 5.010905 | 2.996290 | 2.400481 | 3.463996 |
| 11 O | 4.787174 | 4.924875 | 3.760244 | 2.373852 | 2.634182 |
| 12 C | 4.941934 | 4.091965 | 4.763666 | 3.731352 | 2.444790 |
| 13 C | 4.836748 | 3.703481 | 5.066494 | 4.382412 | 3.083344 |
| 14 C | 4.709633 | 3.615683 | 5.296112 | 4.680180 | 3.719924 |
| 15 C | 5.236882 | 4.054286 | 6.081592 | 5.739313 | 4.818352 |
| 16 C | 5.828695 | 4.527301 | 6.609112 | 6.435398 | 5.326029 |
| 17 C | 5.944660 | 4.608344 | 6.442374 | 6.237288 | 4.916592 |
| 18 C | 5.488070 | 4.229900 | 5.708609 | 5.280660 | 3.847730 |
| 19 C | 4.891593 | 4.679473 | 4.226441 | 2.750528 | 2.386427 |
| 20 H | 5.739899 | 5.396758 | 4.991174 | 3.609998 | 2.940444 |
| 21 C | 5.705191 | 5.579435 | 5.250607 | 3.733453 | 3.691933 |
| 22 C | 5.274446 | 5.398876 | 5.017368 | 3.621174 | 4.075297 |
| 23 C | 4.995590 | 5.024092 | 5.149848 | 3.961711 | 4.341191 |
| 24 C | 5.124438 | 5.394084 | 5.474855 | 4.550089 | 5.231205 |
| 25 C | 5.518384 | 6.074815 | 5.668344 | 4.814609 | 5.807883 |
| 26 C | 5.777574 | 6.395191 | 5.556150 | 4.547021 | 5.622241 |
| 27 C | 5.663453 | 6.086543 | 5.235533 | 3.957430 | 4.804927 |
| 28 H | 1.079020 | 2.172181 | 2.314172 | 3.190141 | 3.962905 |
| 29 H | 2.173296 | 1.078821 | 3.331537 | 3.714583 | 3.377445 |
| 30 H | 2.216497 | 3.238805 | 1.090201 | 2.270074 | 3.344043 |
| 31 H | 2.483371 | 2.922502 | 2.156874 | 1.098809 | 2.233739 |
| 32 H | 3.798902 | 3.445528 | 2.893744 | 2.184475 | 1.105249 |
| 33 H | 3.215264 | 2.210345 | 3.182723 | 3.381410 | 2.263622 |
| 34 H | 5.432691 | 4.590237 | 5.033271 | 4.087285 | 2.669249 |
| 35 H | 5.812111 | 5.014044 | 5.663201 | 4.481145 | 3.382170 |
| 36 H | 4.615839 | 3.759479 | 5.206933 | 4.426959 | 3.758686 |
| 37 H | 5.533271 | 4.484163 | 6.552985 | 6.256166 | 5.542641 |
| 38 H | 6.502282 | 5.228468 | 7.406993 | 7.364178 | 6.316002 |
| 39 H | 6.688968 | 5.355319 | 7.143227 | 7.056439 | 5.696506 |
| 40 H | 5.966856 | 4.777915 | 5.945372 | 5.513757 | 3.992541 |
| 41 H | 6.214602 | 5.886912 | 5.943363 | 4.473767 | 4.154007 |
| 42 H | 6.592842 | 6.553584 | 5.974367 | 4.449335 | 4.494535 |
| 43 H | 5.087119 | 4.832779 | 5.392802 | 4.246267 | 4.262787 |
| 44 H | 5.312366 | 5.497461 | 5.933279 | 5.186004 | 5.766848 |
| 45 H | 5.974797 | 6.643324 | 6.249309 | 5.595749 | 6.678144 |
| 46 H | 6.397606 | 7.160091 | 6.068898 | 5.183483 | 6.390535 |
| 47 H | 6.216558 | 6.671063 | 5.541843 | 4.242819 | 5.078434 |
|      | 6        | 7        | 8        | 9        | 10       |
| 6 C  | 0.000000 |          |          |          |          |
| 7 O  | 1.479024 | 0.000000 |          |          |          |
| 8 C  | 3.563283 | 3.275600 | 0.000000 |          |          |
| 9 N  | 2.717345 | 3.675545 | 2.911144 | 0.000000 |          |

|    |   |          |          |          |          |          |
|----|---|----------|----------|----------|----------|----------|
| 10 | O | 4.413358 | 3.741360 | 1.225662 | 4.131903 | 0.000000 |
| 11 | O | 4.115764 | 4.194913 | 1.359955 | 2.522478 | 2.260382 |
| 12 | C | 3.271361 | 4.474601 | 4.253788 | 1.474420 | 5.446719 |
| 13 | C | 3.206667 | 4.642780 | 5.272950 | 2.503677 | 6.451935 |
| 14 | C | 3.693883 | 5.149370 | 5.753627 | 3.064757 | 6.934040 |
| 15 | C | 4.403662 | 5.839282 | 6.944255 | 4.389243 | 8.081056 |
| 16 | C | 4.674595 | 6.069367 | 7.630523 | 5.108529 | 8.734902 |
| 17 | C | 4.313402 | 5.661930 | 7.291243 | 4.803456 | 8.374980 |
| 18 | C | 3.587619 | 4.948945 | 6.169182 | 3.634419 | 7.275662 |
| 19 | C | 3.905208 | 4.491564 | 2.490554 | 1.491061 | 3.615866 |
| 20 | H | 4.405272 | 5.000159 | 3.193823 | 2.112176 | 4.204544 |
| 21 | C | 5.119025 | 5.777999 | 3.462925 | 2.537906 | 4.462705 |
| 22 | C | 5.319013 | 5.877590 | 3.549874 | 3.156538 | 4.419864 |
| 23 | C | 5.282140 | 6.031108 | 4.367897 | 3.410526 | 5.301269 |
| 24 | C | 5.958954 | 6.561586 | 5.043922 | 4.556436 | 5.788890 |
| 25 | C | 6.602556 | 6.927843 | 5.038897 | 5.319548 | 5.514776 |
| 26 | C | 6.641865 | 6.804702 | 4.358534 | 5.169660 | 4.682608 |
| 27 | C | 6.041990 | 6.294268 | 3.552952 | 4.194797 | 4.062459 |
| 28 | H | 3.341041 | 3.231461 | 4.484158 | 4.762071 | 4.903995 |
| 29 | H | 2.303669 | 3.254465 | 5.178331 | 3.922872 | 6.031077 |
| 30 | H | 3.204854 | 2.120657 | 2.875667 | 4.545249 | 2.799163 |
| 31 | H | 2.992427 | 3.215225 | 2.074520 | 2.508277 | 2.954985 |
| 32 | H | 2.108526 | 2.397160 | 2.446714 | 2.072266 | 3.361404 |
| 33 | H | 1.090096 | 2.105362 | 4.433670 | 3.244310 | 5.273830 |
| 34 | H | 3.468009 | 4.498271 | 4.398899 | 2.120420 | 5.500100 |
| 35 | H | 4.324496 | 5.511822 | 4.838571 | 2.116096 | 6.036640 |
| 36 | H | 4.000002 | 5.354866 | 5.445541 | 2.892698 | 6.623995 |
| 37 | H | 5.115555 | 6.487290 | 7.510727 | 5.083342 | 8.623039 |
| 38 | H | 5.527120 | 6.853061 | 8.615246 | 6.164877 | 9.692074 |
| 39 | H | 4.979341 | 6.203891 | 8.077449 | 5.713173 | 9.111317 |
| 40 | H | 3.833351 | 5.016033 | 6.215886 | 3.906224 | 7.259828 |
| 41 | H | 5.466419 | 6.345370 | 4.417072 | 2.777904 | 5.485844 |
| 42 | H | 5.993852 | 6.509340 | 3.831565 | 3.460368 | 4.636808 |
| 43 | H | 5.084791 | 6.065458 | 4.840292 | 3.169721 | 5.902494 |
| 44 | H | 6.272669 | 6.973198 | 5.887673 | 5.119809 | 6.661255 |
| 45 | H | 7.331494 | 7.578546 | 5.880480 | 6.295555 | 6.233969 |
| 46 | H | 7.395990 | 7.378925 | 4.817875 | 6.070416 | 4.875420 |
| 47 | H | 6.425212 | 6.529588 | 3.451796 | 4.554147 | 3.758681 |
|    |   | 11       | 12       | 13       | 14       | 15       |
| 11 | O | 0.000000 |          |          |          |          |
| 12 | C | 3.684059 | 0.000000 |          |          |          |
| 13 | C | 4.971009 | 1.511701 | 0.000000 |          |          |
| 14 | C | 5.566473 | 2.535820 | 1.402714 | 0.000000 |          |
| 15 | C | 6.883936 | 3.820199 | 2.431334 | 1.395776 | 0.000000 |
| 16 | C | 7.595582 | 4.319403 | 2.807790 | 2.415570 | 1.393095 |
| 17 | C | 7.185500 | 3.815390 | 2.430668 | 2.787045 | 2.412377 |
| 18 | C | 5.936201 | 2.529093 | 1.402965 | 2.414179 | 2.788855 |
| 19 | C | 1.474659 | 2.434202 | 3.800491 | 4.387838 | 5.762501 |
| 20 | H | 2.017537 | 2.436169 | 3.941531 | 4.782794 | 6.148260 |
| 21 | C | 2.452729 | 3.304795 | 4.526903 | 4.761431 | 6.131259 |
| 22 | C | 3.024051 | 4.217162 | 5.149027 | 5.022239 | 6.277069 |
| 23 | C | 4.086780 | 4.328126 | 4.867629 | 4.368818 | 5.458261 |
| 24 | C | 5.046765 | 5.564343 | 5.925308 | 5.228301 | 6.109307 |
| 25 | C | 5.172772 | 6.507270 | 7.031271 | 6.463554 | 7.383469 |
| 26 | C | 4.392010 | 6.443783 | 7.237738 | 6.928113 | 8.013179 |
| 27 | C | 3.242276 | 5.412697 | 6.401439 | 6.305760 | 7.529739 |
| 28 | H | 5.513968 | 5.815952 | 5.645660 | 5.298121 | 5.699726 |
| 29 | H | 5.758536 | 4.332007 | 3.583493 | 3.191225 | 3.296346 |
| 30 | H | 4.194199 | 5.765473 | 6.145084 | 6.376981 | 7.145306 |
| 31 | H | 2.735821 | 3.932041 | 4.496215 | 4.487056 | 5.539679 |
| 32 | H | 2.542491 | 2.728657 | 3.575017 | 4.495604 | 5.589695 |
| 33 | H | 4.828734 | 3.328107 | 3.013247 | 3.720978 | 4.256363 |



|    |   |           |           |          |          |          |
|----|---|-----------|-----------|----------|----------|----------|
| 34 | H | 3.777480  | 1.098315  | 2.153010 | 3.436184 | 4.584195 |
| 35 | H | 4.031117  | 1.098128  | 2.100060 | 2.824324 | 4.119282 |
| 36 | H | 5.226666  | 2.750039  | 2.164717 | 1.087201 | 2.146341 |
| 37 | H | 7.506051  | 4.690208  | 3.414731 | 2.155670 | 1.087371 |
| 38 | H | 8.642332  | 5.406803  | 3.895189 | 3.401273 | 2.153801 |
| 39 | H | 7.995559  | 4.684469  | 3.414814 | 3.874670 | 3.397624 |
| 40 | H | 5.918794  | 2.746351  | 2.170286 | 3.409037 | 3.877104 |
| 41 | H | 3.406724  | 3.082937  | 4.180068 | 4.337337 | 5.677040 |
| 42 | H | 2.655757  | 4.142516  | 5.473952 | 5.806719 | 7.184478 |
| 43 | H | 4.476227  | 3.763719  | 4.097616 | 3.470706 | 4.535707 |
| 44 | H | 5.960144  | 5.985412  | 6.085608 | 5.167355 | 5.829356 |
| 45 | H | 6.149670  | 7.489567  | 7.908959 | 7.240135 | 8.037199 |
| 46 | H | 4.953401  | 7.392355  | 8.235028 | 7.969383 | 9.048487 |
| 47 | H | 2.998983  | 5.752059  | 6.908738 | 7.003267 | 8.289313 |
|    |   | 16        | 17        | 18       | 19       | 20       |
| 16 | C | 0.000000  |           |          |          |          |
| 17 | C | 1.393249  | 0.000000  |          |          |          |
| 18 | C | 2.416941  | 1.396183  | 0.000000 |          |          |
| 19 | C | 6.517388  | 6.149078  | 4.885183 | 0.000000 |          |
| 20 | H | 6.746495  | 6.189817  | 4.836291 | 1.098004 | 0.000000 |
| 21 | C | 7.103258  | 6.957566  | 5.787534 | 1.547883 | 2.143159 |
| 22 | C | 7.415807  | 7.511774  | 6.501099 | 2.575865 | 3.479182 |
| 23 | C | 6.722140  | 7.063251  | 6.261206 | 3.417880 | 4.356626 |
| 24 | C | 7.427692  | 7.940564  | 7.286292 | 4.639788 | 5.644048 |
| 25 | C | 8.662872  | 9.103568  | 8.376556 | 5.138469 | 6.161294 |
| 26 | C | 9.218617  | 9.464948  | 8.567370 | 4.630923 | 5.586150 |
| 27 | C | 8.661269  | 8.742827  | 7.715103 | 3.405301 | 4.280875 |
| 28 | H | 6.387206  | 6.690031  | 6.353668 | 5.654061 | 6.583522 |
| 29 | H | 3.770789  | 4.114187  | 4.032891 | 5.300574 | 5.994562 |
| 30 | H | 7.662387  | 7.487353  | 6.759807 | 4.946350 | 5.698673 |
| 31 | H | 6.438167  | 6.457850  | 5.582982 | 2.877598 | 3.911368 |
| 32 | H | 5.913749  | 5.263327  | 4.083558 | 2.541176 | 2.728155 |
| 33 | H | 4.204055  | 3.604966  | 2.955338 | 4.481099 | 4.764009 |
| 34 | H | 4.807238  | 3.999770  | 2.605648 | 2.740692 | 2.355701 |
| 35 | H | 4.736020  | 4.345938  | 3.145820 | 2.598613 | 2.462382 |
| 36 | H | 3.394456  | 3.874140  | 3.405291 | 4.045603 | 4.607514 |
| 37 | H | 2.153602  | 3.398053  | 3.876221 | 6.407540 | 6.900998 |
| 38 | H | 1.087401  | 2.154118  | 3.402514 | 7.587077 | 7.833265 |
| 39 | H | 2.152943  | 1.087637  | 2.156497 | 7.019939 | 6.968371 |
| 40 | H | 3.394623  | 2.144522  | 1.088486 | 4.969372 | 4.714100 |
| 41 | H | 6.662724  | 6.567531  | 5.451836 | 2.185535 | 2.495192 |
| 42 | H | 8.118666  | 7.894182  | 6.665322 | 2.165999 | 2.406283 |
| 43 | H | 5.821437  | 6.219436  | 5.492800 | 3.493819 | 4.310813 |
| 44 | H | 7.186447  | 7.877085  | 7.402493 | 5.442124 | 6.430095 |
| 45 | H | 9.329438  | 9.866544  | 9.230751 | 6.188654 | 7.226184 |
| 46 | H | 10.234900 | 10.455678 | 9.538713 | 5.429919 | 6.340578 |
| 47 | H | 9.341792  | 9.284160  | 8.157610 | 3.475060 | 4.175832 |
|    |   | 21        | 22        | 23       | 24       | 25       |
| 21 | C | 0.000000  |           |          |          |          |
| 22 | C | 1.512309  | 0.000000  |          |          |          |
| 23 | C | 2.530534  | 1.400852  | 0.000000 |          |          |
| 24 | C | 3.815159  | 2.427931  | 1.395528 | 0.000000 |          |
| 25 | C | 4.316980  | 2.804986  | 2.416092 | 1.393236 | 0.000000 |
| 26 | C | 3.816058  | 2.429299  | 2.788266 | 2.412620 | 1.393313 |
| 27 | C | 2.531537  | 1.402663  | 2.414574 | 2.787762 | 2.415877 |
| 28 | H | 6.267035  | 5.594612  | 5.162253 | 4.995621 | 5.282909 |
| 29 | H | 6.055476  | 5.841590  | 5.235781 | 5.546365 | 6.392088 |
| 30 | H | 5.920363  | 5.589928  | 5.826381 | 6.004948 | 5.959577 |
| 31 | H | 3.410135  | 2.905717  | 3.034395 | 3.477578 | 3.773176 |
| 32 | H | 4.052113  | 4.698616  | 5.194442 | 6.160273 | 6.642598 |
| 33 | H | 5.762986  | 6.148779  | 6.097712 | 6.861100 | 7.596317 |
| 34 | H | 3.867492  | 4.962546  | 5.275052 | 6.527632 | 7.370713 |

|    |   |           |          |          |          |           |
|----|---|-----------|----------|----------|----------|-----------|
| 35 | H | 2.993949  | 4.049981 | 4.169126 | 5.497628 | 6.494865  |
| 36 | H | 4.119449  | 4.166615 | 3.366092 | 4.199553 | 5.477594  |
| 37 | H | 6.587038  | 6.518387 | 5.507171 | 5.948621 | 7.254390  |
| 38 | H | 8.142261  | 8.381900 | 7.598913 | 8.195622 | 9.443819  |
| 39 | H | 7.916308  | 8.533986 | 8.132237 | 9.012337 | 10.156483 |
| 40 | H | 6.033428  | 6.922586 | 6.883003 | 7.985975 | 8.993326  |
| 41 | H | 1.097286  | 2.141784 | 2.674398 | 4.044871 | 4.801299  |
| 42 | H | 1.098349  | 2.124136 | 3.355791 | 4.515800 | 4.777664  |
| 43 | H | 2.744447  | 2.164784 | 1.087303 | 2.145924 | 3.394743  |
| 44 | H | 4.684462  | 3.411671 | 2.155321 | 1.087519 | 2.153564  |
| 45 | H | 5.404421  | 3.892466 | 3.401614 | 2.153919 | 1.087480  |
| 46 | H | 4.686241  | 3.413699 | 3.875765 | 3.397908 | 2.153163  |
| 47 | H | 2.748473  | 2.169041 | 3.408216 | 3.876174 | 3.394909  |
|    |   | 26        | 27       | 28       | 29       | 30        |
| 26 | C | 0.000000  |          |          |          |           |
| 27 | C | 1.395582  | 0.000000 |          |          |           |
| 28 | H | 5.708884  | 5.855152 | 0.000000 |          |           |
| 29 | H | 6.902923  | 6.656430 | 2.650195 | 0.000000 |           |
| 30 | H | 5.735827  | 5.547638 | 2.675944 | 4.261478 | 0.000000  |
| 31 | H | 3.675941  | 3.259249 | 2.965264 | 3.683547 | 2.824953  |
| 32 | H | 6.274364  | 5.328736 | 4.824938 | 4.273180 | 3.658662  |
| 33 | H | 7.648024  | 6.971424 | 4.233211 | 2.670441 | 4.116456  |
| 34 | H | 7.161752  | 6.042259 | 6.400653 | 4.937391 | 5.969785  |
| 35 | H | 6.427752  | 5.336627 | 6.604998 | 5.168165 | 6.640043  |
| 36 | H | 6.007025  | 5.458043 | 5.078975 | 3.429692 | 6.244257  |
| 37 | H | 8.052320  | 7.733189 | 5.801680 | 3.605220 | 7.575784  |
| 38 | H | 10.091096 | 9.613902 | 6.961172 | 4.355370 | 8.427807  |
| 39 | H | 10.490817 | 9.745977 | 7.452669 | 4.879460 | 8.145565  |
| 40 | H | 9.035022  | 8.077091 | 6.920838 | 4.764044 | 6.937057  |
| 41 | H | 4.531071  | 3.365155 | 6.780295 | 6.193173 | 6.721860  |
| 42 | H | 4.014860  | 2.642603 | 7.150796 | 7.094610 | 6.524314  |
| 43 | H | 3.875450  | 3.406354 | 5.338738 | 4.869882 | 6.213953  |
| 44 | H | 3.398229  | 3.875280 | 5.054602 | 5.450138 | 6.507936  |
| 45 | H | 2.154261  | 3.401663 | 5.551519 | 6.905931 | 6.434230  |
| 46 | H | 1.087507  | 2.156106 | 6.258746 | 7.733267 | 6.063035  |
| 47 | H | 2.145631  | 1.088562 | 6.495211 | 7.346053 | 5.743154  |
|    |   | 31        | 32       | 33       | 34       | 35        |
| 31 | H | 0.000000  |          |          |          |           |
| 32 | H | 3.093039  | 0.000000 |          |          |           |
| 33 | H | 4.039006  | 2.479150 | 0.000000 |          |           |
| 34 | H | 4.533543  | 2.494722 | 3.311157 | 0.000000 |           |
| 35 | H | 4.507225  | 3.654884 | 4.415336 | 1.758188 | 0.000000  |
| 36 | H | 4.002473  | 4.652336 | 4.297182 | 3.808543 | 2.832254  |
| 37 | H | 5.892902  | 6.414826 | 5.099904 | 5.547070 | 4.891338  |
| 38 | H | 7.341062  | 6.912876 | 5.022050 | 5.873627 | 5.800880  |
| 39 | H | 7.373820  | 5.905198 | 4.112527 | 4.674406 | 5.229623  |
| 40 | H | 5.988205  | 3.925682 | 3.064262 | 2.361085 | 3.388838  |
| 41 | H | 4.115291  | 4.556774 | 5.978526 | 3.747554 | 2.446484  |
| 42 | H | 4.213705  | 4.657613 | 6.622196 | 4.512972 | 3.752233  |
| 43 | H | 3.431443  | 5.147376 | 5.758935 | 4.799380 | 3.517366  |
| 44 | H | 4.109744  | 6.774831 | 7.120763 | 7.014596 | 5.925723  |
| 45 | H | 4.551069  | 7.543183 | 8.345120 | 8.370749 | 7.510440  |
| 46 | H | 4.408491  | 6.960829 | 8.430347 | 8.042601 | 7.407880  |
| 47 | H | 3.785607  | 5.390820 | 7.323262 | 6.212414 | 5.678070  |
|    |   | 36        | 37       | 38       | 39       | 40        |
| 36 | H | 0.000000  |          |          |          |           |
| 37 | H | 2.467929  | 0.000000 |          |          |           |
| 38 | H | 4.290226  | 2.480822 | 0.000000 |          |           |
| 39 | H | 4.961752  | 4.295615 | 2.479814 | 0.000000 |           |
| 40 | H | 4.318400  | 4.964448 | 4.289226 | 2.464499 | 0.000000  |
| 41 | H | 3.693648  | 6.115504 | 7.684966 | 7.538455 | 5.762608  |
| 42 | H | 5.189612  | 7.656049 | 9.169099 | 8.814379 | 6.794560  |

43 H 2.428186 4.586198 6.689334 7.300074 6.193599  
44 H 4.136214 5.484184 7.844243 8.948295 8.211058  
45 H 6.255492 7.795964 10.037028 10.914644 9.893447  
46 H 7.068793 9.084949 11.103033 11.465130 9.962203  
47 H 6.239137 8.588556 10.334783 10.243529 8.387348  
41 42 43 44 45  
41 H 0.000000  
42 H 1.750054 0.000000  
43 H 2.498199 3.701945 0.000000  
44 H 4.746933 5.461905 2.466991 0.000000  
45 H 5.868867 5.844768 4.290101 2.480519 0.000000  
46 H 5.473516 4.714365 4.962936 4.295822 2.480300  
47 H 3.702978 2.462680 4.317943 4.963681 4.290232  
46 47  
46 H 0.000000  
47 H 2.466696 0.000000

Stoichiometry C22H21NO3

Framework group C1[X(C22H21NO3)]

Deg. of freedom 135

Full point group C1 NOp 1

Largest Abelian subgroup C1 NOp 1

Largest concise Abelian subgroup C1 NOp 1

Standard orientation:

| Center Number | Atomic Number | Atomic Type | Coordinates (Angstroms) |           |           |
|---------------|---------------|-------------|-------------------------|-----------|-----------|
|               |               |             | X                       | Y         | Z         |
| 1             | 6             | 0           | -0.274830               | 1.762241  | 2.439431  |
| 2             | 6             | 0           | -1.401974               | 1.261559  | 1.910191  |
| 3             | 6             | 0           | 0.380228                | 2.552881  | 1.341498  |
| 4             | 6             | 0           | 0.834279                | 1.527393  | 0.302815  |
| 5             | 6             | 0           | -0.457749               | 1.276323  | -0.492669 |
| 6             | 6             | 0           | -1.504505               | 1.804276  | 0.515680  |
| 7             | 8             | 0           | -0.834475               | 3.101985  | 0.749182  |
| 8             | 6             | 0           | 1.836490                | 1.902347  | -0.719278 |
| 9             | 7             | 0           | -0.289322               | -0.059876 | -1.043882 |
| 10            | 8             | 0           | 2.641243                | 2.819884  | -0.606392 |
| 11            | 8             | 0           | 1.812045                | 1.101171  | -1.817912 |
| 12            | 6             | 0           | -1.483011               | -0.545513 | -1.760245 |
| 13            | 6             | 0           | -2.656415               | -0.854176 | -0.858530 |
| 14            | 6             | 0           | -2.520305               | -1.735230 | 0.224440  |
| 15            | 6             | 0           | -3.610584               | -2.026609 | 1.045768  |
| 16            | 6             | 0           | -4.851380               | -1.447755 | 0.788734  |
| 17            | 6             | 0           | -5.004774               | -0.583125 | -0.292944 |
| 18            | 6             | 0           | -3.915604               | -0.291842 | -1.116467 |
| 19            | 6             | 0           | 0.890496                | -0.041828 | -1.955457 |
| 20            | 1             | 0           | 0.529787                | 0.071114  | -2.986352 |
| 21            | 6             | 0           | 1.719438                | -1.348164 | -1.907692 |
| 22            | 6             | 0           | 2.432319                | -1.595029 | -0.596991 |
| 23            | 6             | 0           | 1.805446                | -2.311306 | 0.430803  |
| 24            | 6             | 0           | 2.449479                | -2.506265 | 1.653387  |
| 25            | 6             | 0           | 3.727881                | -1.991954 | 1.859005  |
| 26            | 6             | 0           | 4.365668                | -1.285956 | 0.841107  |
| 27            | 6             | 0           | 3.722923                | -1.089486 | -0.381974 |
| 28            | 1             | 0           | 0.136165                | 1.555723  | 3.415504  |
| 29            | 1             | 0           | -2.099532               | 0.583383  | 2.376394  |
| 30            | 1             | 0           | 1.070055                | 3.338099  | 1.651513  |
| 31            | 1             | 0           | 1.237357                | 0.644240  | 0.817550  |
| 32            | 1             | 0           | -0.527702               | 1.976493  | -1.344986 |
| 33            | 1             | 0           | -2.512140               | 1.984803  | 0.140989  |
| 34            | 1             | 0           | -1.779657               | 0.175619  | -2.533722 |
| 35            | 1             | 0           | -1.247754               | -1.481493 | -2.284153 |

|    |   |   |           |           |           |
|----|---|---|-----------|-----------|-----------|
| 36 | 1 | 0 | -1.558613 | -2.194628 | 0.439167  |
| 37 | 1 | 0 | -3.491222 | -2.706083 | 1.886269  |
| 38 | 1 | 0 | -5.700798 | -1.675253 | 1.428402  |
| 39 | 1 | 0 | -5.975826 | -0.138240 | -0.498105 |
| 40 | 1 | 0 | -4.060931 | 0.380077  | -1.960391 |
| 41 | 1 | 0 | 1.083173  | -2.210825 | -2.142256 |
| 42 | 1 | 0 | 2.477355  | -1.313169 | -2.701862 |
| 43 | 1 | 0 | 0.807517  | -2.718765 | 0.288178  |
| 44 | 1 | 0 | 1.952763  | -3.060519 | 2.446339  |
| 45 | 1 | 0 | 4.229318  | -2.145739 | 2.811645  |
| 46 | 1 | 0 | 5.366149  | -0.890265 | 0.999659  |
| 47 | 1 | 0 | 4.238191  | -0.536459 | -1.165317 |

Rotational constants (GHZ): 0.3130871 0.1709984 0.1481115

Standard basis: 6-31G (6D, 7F)

There are 276 symmetry adapted basis functions of A symmetry.

Integral buffers will be 262144 words long.

Raffenetti 2 integral format.

Two-electron integral symmetry is turned on.

276 basis functions, 656 primitive gaussians, 276 cartesian basis functions

92 alpha electrons 92 beta electrons

nuclear repulsion energy 2388.6614447516 Hartrees.

NAtoms= 47 NActive= 47 NUniq= 47 SFac= 1.00D+00 NAtFMM= 60 Big=F

United Atom Topological Model (UA0 parameters set).

| Nord | Group | Hybr | Charge | Alpha | Radius                  | Bonded to |
|------|-------|------|--------|-------|-------------------------|-----------|
| 1    | CH *  | 0.00 | 1.00   | 2.125 | C2 [d] C3 [s]           |           |
| 2    | CH *  | 0.00 | 1.00   | 2.125 | C1 [d] C6 [s]           |           |
| 3    | CH *  | 0.00 | 1.00   | 2.125 | C1 [s] C4 [s] O7 [s]    |           |
| 4    | CH *  | 0.00 | 1.00   | 2.125 | C3 [s] C5 [s] C8 [s]    |           |
| 5    | CH *  | 0.00 | 1.00   | 2.125 | C4 [s] C6 [s] N9 [s]    |           |
| 6    | CH *  | 0.00 | 1.00   | 2.125 | C2 [s] C5 [s] O7 [s]    |           |
| 7    | O *   | 0.00 | 1.00   | 1.750 | C3 [s] C6 [s]           |           |
| 8    | C *   | 0.00 | 1.00   | 1.925 | C4 [s] O10 [d] O11 [s]  |           |
| 9    | N *   | 0.00 | 1.00   | 1.830 | C5 [s] C12 [s] C19 [s]  |           |
| 10   | O *   | 0.00 | 1.00   | 1.750 | C8 [d]                  |           |
| 11   | O *   | 0.00 | 1.00   | 1.750 | C8 [s] C19 [s]          |           |
| 12   | CH2 * | 0.00 | 1.00   | 2.325 | N9 [s] C13 [s]          |           |
| 13   | C *   | 0.00 | 1.00   | 1.925 | C12 [s] C14 [s] C18 [s] |           |
| 14   | CH *  | 0.00 | 1.00   | 2.125 | C13 [s] C15 [s]         |           |
| 15   | CH *  | 0.00 | 1.00   | 2.125 | C14 [s] C16 [s]         |           |
| 16   | CH *  | 0.00 | 1.00   | 2.125 | C15 [s] C17 [s]         |           |
| 17   | CH *  | 0.00 | 1.00   | 2.125 | C16 [s] C18 [s]         |           |
| 18   | CH *  | 0.00 | 1.00   | 2.125 | C13 [s] C17 [s]         |           |
| 19   | CH *  | 0.00 | 1.00   | 2.125 | N9 [s] O11 [s] C21 [s]  |           |
| 21   | CH2 * | 0.00 | 1.00   | 2.325 | C19 [s] C22 [s]         |           |
| 22   | C *   | 0.00 | 1.00   | 1.925 | C21 [s] C23 [s] C27 [s] |           |
| 23   | CH *  | 0.00 | 1.00   | 2.125 | C22 [s] C24 [s]         |           |
| 24   | CH *  | 0.00 | 1.00   | 2.125 | C23 [s] C25 [s]         |           |
| 25   | CH *  | 0.00 | 1.00   | 2.125 | C24 [s] C26 [s]         |           |
| 26   | CH *  | 0.00 | 1.00   | 2.125 | C25 [s] C27 [s]         |           |
| 27   | CH *  | 0.00 | 1.00   | 2.125 | C22 [s] C26 [s]         |           |

Polarizable Continuum Model (PCM)

Model : PCM.

Atomic radii : UA0 (Simple United Atom Topological Model).

Polarization charges : Total charges.

Charge compensation : None.

Solution method : Matrix inversion.

Cavity : GePol (RMin=0.200 OFac=0.890).

Default sphere list used, NSphG= 26.

Tesserae with average area of 0.200 Ang\*\*2.  
Solvent : Methanol, Eps= 32.630000.

-----  
One-electron integrals computed using PRISM.

NBasis= 276 RedAO= T NBF= 276

NBsUse= 276 1.00D-06 NBFU= 276

Harris functional with IExCor= 402 diagonalized for initial guess.

ExpMin= 1.61D-01 ExpMax= 5.48D+03 ExpMxC= 8.25D+02 IAcc=1 IRadAn= 1 AccDes= 1.00D-06

HarFok: IExCor= 402 AccDes= 1.00D-06 IRadAn= 1 IDoV=1

ScaDFX= 1.000000 1.000000 1.000000 1.000000

Initial guess orbital symmetries:

Occupied (A) (A) (A) (A) (A) (A) (A) (A) (A) (A)

(A) (A) (A) (A) (A) (A) (A) (A) (A) (A) (A)

(A) (A) (A) (A) (A) (A) (A) (A) (A) (A) (A)

(A) (A) (A) (A) (A) (A) (A) (A) (A) (A) (A)

(A) (A) (A) (A) (A) (A) (A) (A) (A) (A) (A)

(A) (A) (A) (A) (A) (A) (A) (A) (A) (A) (A)

(A) (A) (A) (A) (A) (A) (A) (A) (A) (A) (A)

(A) (A) (A) (A) (A) (A) (A) (A)

Virtual (A) (A)

(A) (A) (A) (A) (A) (A) (A) (A) (A) (A) (A) (A)

(A) (A) (A) (A) (A) (A) (A) (A) (A) (A) (A) (A)

(A) (A) (A) (A) (A) (A) (A) (A) (A) (A) (A) (A)

(A) (A) (A) (A) (A) (A) (A) (A) (A) (A) (A) (A)

(A) (A) (A) (A) (A) (A) (A) (A) (A) (A) (A) (A)

(A) (A) (A) (A) (A) (A) (A) (A) (A) (A) (A) (A)

(A) (A) (A) (A) (A) (A) (A) (A) (A) (A) (A) (A)

(A) (A) (A) (A) (A) (A) (A) (A) (A) (A) (A) (A)

(A) (A) (A) (A) (A) (A) (A) (A) (A) (A) (A) (A)

(A) (A) (A) (A) (A) (A) (A) (A) (A) (A) (A) (A)

(A) (A) (A) (A) (A) (A) (A) (A) (A) (A) (A) (A)

(A) (A) (A) (A) (A) (A) (A) (A) (A) (A) (A) (A)

(A) (A) (A) (A) (A) (A) (A) (A) (A) (A) (A) (A)

(A) (A) (A) (A) (A) (A) (A) (A) (A) (A) (A) (A)

(A) (A) (A) (A) (A) (A) (A) (A) (A) (A) (A) (A)

(A) (A) (A) (A)

The electronic state of the initial guess is 1-A.

Warning! Cutoffs for single-point calculations used.

Requested convergence on RMS density matrix=1.00D-04 within 128 cycles.

Requested convergence on MAX density matrix=1.00D-02.

Requested convergence on energy=5.00D-05.

No special actions if energy rises.

Error on total polarization charges = 0.02431

SCF Done: E(RB+HF-LYP) = -1131.02725493 A.U. after 8 cycles

Conv = 0.5587D-05 -V/T = 2.0050

S\*\*2 = 0.0000

-----  
Variational PCM results

=====

<psi(f)| H |psi(f)> (a.u.) = -1130.996922

<psi(f)|H+V(f)/2|psi(f)> (a.u.) = -1131.027255

Total free energy in solution:

with all non electrostatic terms (a.u.) = -1131.016922

-----  
(Polarized solute)-Solvent (kcal/mol) = -19.03

-----  
Cavitation energy (kcal/mol) = 30.35

Dispersion energy (kcal/mol) = -25.77

Repulsion energy (kcal/mol) = 1.91

Total non electrostatic (kcal/mol) = 6.48

-----  
Partition over spheres:

Sphere on Atom Surface Charge GEl GCav GDR

|    |     |       |        |       |      |       |
|----|-----|-------|--------|-------|------|-------|
| 1  | C1  | 16.94 | -0.040 | -0.70 | 1.73 | -1.48 |
| 2  | C2  | 10.54 | -0.013 | -0.35 | 1.49 | -0.89 |
| 3  | C3  | 9.56  | -0.056 | -0.20 | 1.13 | -0.98 |
| 4  | C4  | 0.00  | 0.000  | 0.00  | 0.50 | -0.01 |
| 5  | C5  | 3.42  | -0.034 | -0.30 | 0.48 | -0.42 |
| 6  | C6  | 6.80  | -0.034 | -0.34 | 0.85 | -0.63 |
| 7  | O7  | 8.61  | 0.130  | -2.79 | 0.97 | -1.03 |
| 8  | C8  | 1.71  | -0.008 | 0.04  | 0.39 | -0.12 |
| 9  | N9  | 0.00  | 0.000  | 0.00  | 0.09 | 0.00  |
| 10 | O10 | 15.97 | 0.194  | -4.82 | 1.93 | -1.61 |
| 11 | O11 | 6.14  | 0.067  | -1.06 | 0.75 | -0.67 |
| 12 | C12 | 17.18 | -0.061 | -0.79 | 1.76 | -1.52 |
| 13 | C13 | 0.00  | 0.000  | 0.00  | 0.05 | 0.00  |
| 14 | C14 | 6.16  | 0.005  | -0.07 | 1.30 | -0.57 |
| 15 | C15 | 15.20 | -0.025 | -0.56 | 1.66 | -1.44 |
| 16 | C16 | 16.51 | -0.020 | -0.53 | 1.69 | -1.50 |
| 17 | C17 | 17.33 | -0.020 | -0.54 | 1.69 | -1.53 |
| 18 | C18 | 12.38 | -0.023 | -0.56 | 1.43 | -1.18 |
| 19 | C19 | 6.06  | -0.053 | -0.82 | 0.57 | -0.54 |
| 20 | C21 | 21.52 | -0.063 | -0.62 | 1.96 | -1.78 |
| 21 | C22 | 0.06  | 0.000  | 0.00  | 0.06 | 0.00  |
| 22 | C23 | 7.75  | 0.001  | -0.19 | 1.44 | -0.66 |
| 23 | C24 | 14.99 | -0.023 | -0.52 | 1.69 | -1.36 |
| 24 | C25 | 16.18 | -0.018 | -0.47 | 1.69 | -1.49 |
| 25 | C26 | 16.45 | -0.020 | -0.42 | 1.69 | -1.48 |
| 26 | C27 | 10.14 | -0.020 | -0.26 | 1.37 | -0.98 |

Added spheres: 77.97 0.109 -2.16 0.00 0.00

-----

\*\*\*\*\*

Population analysis using the SCF density.

\*\*\*\*\*

Orbital symmetries:

Occupied (A) (A)

(A) (A) (A) (A) (A) (A) (A) (A) (A) (A) (A) (A) (A)

(A) (A) (A) (A) (A) (A) (A) (A) (A) (A) (A) (A) (A)

(A) (A) (A) (A) (A) (A) (A) (A) (A) (A) (A) (A) (A)

(A) (A) (A) (A) (A) (A) (A) (A) (A) (A) (A) (A) (A)

(A) (A) (A) (A) (A) (A) (A) (A) (A) (A) (A) (A) (A)

(A) (A) (A) (A) (A) (A) (A) (A) (A) (A) (A) (A) (A)

(A) (A) (A) (A) (A) (A) (A) (A)

Virtual (A) (A)

(A) (A) (A) (A) (A) (A) (A) (A) (A) (A) (A) (A) (A)

(A) (A) (A) (A) (A) (A) (A) (A) (A) (A) (A) (A) (A)

(A) (A) (A) (A) (A) (A) (A) (A) (A) (A) (A) (A) (A)

(A) (A) (A) (A) (A) (A) (A) (A) (A) (A) (A) (A) (A)

(A) (A) (A) (A) (A) (A) (A) (A) (A) (A) (A) (A) (A)

(A) (A) (A) (A) (A) (A) (A) (A) (A) (A) (A) (A) (A)

(A) (A) (A) (A) (A) (A) (A) (A) (A) (A) (A) (A) (A)

(A) (A) (A) (A) (A) (A) (A) (A) (A) (A) (A) (A) (A)

(A) (A) (A) (A) (A) (A) (A) (A) (A) (A) (A) (A) (A)

(A) (A) (A) (A) (A) (A) (A) (A) (A) (A) (A) (A) (A)

(A) (A) (A) (A) (A) (A) (A) (A) (A) (A) (A) (A) (A)

(A) (A) (A) (A) (A) (A) (A) (A) (A) (A) (A) (A) (A)

(A) (A) (A) (A) (A) (A) (A) (A) (A) (A) (A) (A) (A)

(A) (A) (A) (A) (A) (A) (A) (A) (A) (A) (A) (A) (A)

(A) (A) (A) (A)

The electronic state is 1-A.

Alpha occ. eigenvalues -- -19.20681 -19.15178 -19.14981 -14.34637 -10.33732

Alpha occ. eigenvalues -- -10.29101 -10.24653 -10.24359 -10.23338 -10.21682  
Alpha occ. eigenvalues -- -10.20550 -10.19702 -10.19368 -10.19112 -10.18612  
Alpha occ. eigenvalues -- -10.18531 -10.18524 -10.18460 -10.18420 -10.18412  
Alpha occ. eigenvalues -- -10.18306 -10.18230 -10.18221 -10.18185 -10.18173  
Alpha occ. eigenvalues -- -10.18099 -1.12600 -1.06661 -1.04848 -0.94913  
Alpha occ. eigenvalues -- -0.86072 -0.85931 -0.82906 -0.79663 -0.78647  
Alpha occ. eigenvalues -- -0.76767 -0.75695 -0.74676 -0.74465 -0.72524  
Alpha occ. eigenvalues -- -0.68328 -0.65941 -0.64667 -0.60722 -0.60391  
Alpha occ. eigenvalues -- -0.59865 -0.58554 -0.57929 -0.56101 -0.55448  
Alpha occ. eigenvalues -- -0.55137 -0.51718 -0.51218 -0.50436 -0.49738  
Alpha occ. eigenvalues -- -0.48652 -0.48072 -0.46509 -0.45926 -0.45556  
Alpha occ. eigenvalues -- -0.44852 -0.44702 -0.44155 -0.42447 -0.42200  
Alpha occ. eigenvalues -- -0.41849 -0.41402 -0.40823 -0.40603 -0.39994  
Alpha occ. eigenvalues -- -0.39698 -0.39051 -0.38636 -0.37037 -0.36850  
Alpha occ. eigenvalues -- -0.35952 -0.35290 -0.35176 -0.34453 -0.34103  
Alpha occ. eigenvalues -- -0.33670 -0.33570 -0.33305 -0.30992 -0.28327  
Alpha occ. eigenvalues -- -0.27717 -0.25273 -0.25075 -0.24859 -0.24463  
Alpha occ. eigenvalues -- -0.24354 -0.22324  
Alpha virt. eigenvalues -- -0.01035 -0.00510 -0.00189 0.00121 0.00318  
Alpha virt. eigenvalues -- 0.00522 0.07495 0.08961 0.09595 0.09825  
Alpha virt. eigenvalues -- 0.10834 0.11393 0.12716 0.13145 0.13529  
Alpha virt. eigenvalues -- 0.13930 0.14258 0.14554 0.15175 0.15677  
Alpha virt. eigenvalues -- 0.16187 0.16485 0.16750 0.17311 0.17711  
Alpha virt. eigenvalues -- 0.18014 0.18039 0.18809 0.18923 0.19855  
Alpha virt. eigenvalues -- 0.20612 0.21072 0.21621 0.22618 0.23611  
Alpha virt. eigenvalues -- 0.24001 0.25644 0.26162 0.26561 0.27122  
Alpha virt. eigenvalues -- 0.27775 0.29121 0.31275 0.31658 0.32190  
Alpha virt. eigenvalues -- 0.32881 0.33516 0.33910 0.34425 0.35269  
Alpha virt. eigenvalues -- 0.35561 0.36396 0.36811 0.37068 0.42099  
Alpha virt. eigenvalues -- 0.47184 0.49039 0.49194 0.50480 0.52802  
Alpha virt. eigenvalues -- 0.53401 0.53544 0.54103 0.54260 0.54800  
Alpha virt. eigenvalues -- 0.55335 0.56462 0.56623 0.57221 0.57787  
Alpha virt. eigenvalues -- 0.58186 0.58978 0.59477 0.59680 0.60335  
Alpha virt. eigenvalues -- 0.61364 0.62087 0.62249 0.62454 0.62750  
Alpha virt. eigenvalues -- 0.63057 0.63537 0.64049 0.64443 0.64758  
Alpha virt. eigenvalues -- 0.65005 0.65403 0.65767 0.66298 0.66455  
Alpha virt. eigenvalues -- 0.66690 0.67252 0.67564 0.68175 0.68546  
Alpha virt. eigenvalues -- 0.70690 0.71123 0.72502 0.74084 0.74543  
Alpha virt. eigenvalues -- 0.75820 0.76903 0.78194 0.80690 0.82104  
Alpha virt. eigenvalues -- 0.82572 0.83573 0.84426 0.85084 0.85483  
Alpha virt. eigenvalues -- 0.85932 0.86590 0.86771 0.87149 0.87340  
Alpha virt. eigenvalues -- 0.87410 0.88119 0.88203 0.89296 0.89864  
Alpha virt. eigenvalues -- 0.91011 0.91597 0.93184 0.93936 0.94924  
Alpha virt. eigenvalues -- 0.95079 0.95936 0.96972 0.97758 0.97997  
Alpha virt. eigenvalues -- 0.98251 0.99534 0.99945 1.00396 1.01311  
Alpha virt. eigenvalues -- 1.02023 1.02755 1.04229 1.05326 1.05633  
Alpha virt. eigenvalues -- 1.06666 1.07234 1.08435 1.09064 1.10152  
Alpha virt. eigenvalues -- 1.14523 1.15551 1.15918 1.17270 1.17944  
Alpha virt. eigenvalues -- 1.19710 1.20334 1.21763 1.22370 1.22908  
Alpha virt. eigenvalues -- 1.23729 1.24944 1.26514 1.28179 1.29946  
Alpha virt. eigenvalues -- 1.33772 1.36360 1.37499 1.41759 1.44285  
Alpha virt. eigenvalues -- 1.45179 1.48633 1.49248 1.52422 1.54064  
Alpha virt. eigenvalues -- 1.54918 1.60632 1.63214 1.69693 1.75602  
Alpha virt. eigenvalues -- 1.81771 1.84021 1.86687 1.92631 1.93120  
Alpha virt. eigenvalues -- 1.98963 2.06100 2.11096 2.46885

Condensed to atoms (all electrons):

|     | 1         | 2         | 3         | 4         | 5         | 6         |
|-----|-----------|-----------|-----------|-----------|-----------|-----------|
| 1 C | 5.076045  | 0.636843  | 0.277324  | -0.050621 | -0.018417 | -0.055586 |
| 2 C | 0.636843  | 5.080092  | -0.040325 | -0.043716 | -0.031561 | 0.256239  |
| 3 C | 0.277324  | -0.040325 | 5.358540  | 0.112553  | -0.061983 | -0.148499 |
| 4 C | -0.050621 | -0.043716 | 0.112553  | 6.094769  | 0.198631  | -0.013172 |
| 5 C | -0.018417 | -0.031561 | -0.061983 | 0.198631  | 5.425540  | 0.166117  |

|    |   |           |           |           |           |           |           |
|----|---|-----------|-----------|-----------|-----------|-----------|-----------|
| 6  | C | -0.055586 | 0.256239  | -0.148499 | -0.013172 | 0.166117  | 5.417833  |
| 7  | O | -0.090523 | -0.103723 | 0.204745  | -0.100224 | -0.072092 | 0.197880  |
| 8  | C | 0.005953  | 0.001654  | 0.002803  | 0.078672  | -0.022848 | 0.001484  |
| 9  | N | -0.000513 | 0.001740  | 0.008239  | -0.049670 | 0.114578  | -0.017588 |
| 10 | O | 0.000160  | -0.000026 | 0.004499  | -0.123312 | 0.002662  | -0.000186 |
| 11 | O | -0.000138 | -0.000042 | 0.004712  | -0.137410 | 0.014676  | 0.000477  |
| 12 | C | -0.000023 | -0.000127 | -0.000291 | 0.007353  | -0.054708 | -0.004983 |
| 13 | C | 0.000028  | -0.000172 | -0.000044 | 0.000154  | -0.003682 | 0.004991  |
| 14 | C | -0.000027 | 0.000847  | 0.000016  | -0.000131 | -0.000972 | -0.000417 |
| 15 | C | 0.000003  | -0.000973 | 0.000002  | -0.000005 | -0.000009 | -0.000173 |
| 16 | C | 0.000002  | -0.000199 | 0.000000  | 0.000000  | 0.000006  | -0.000041 |
| 17 | C | 0.000001  | 0.000046  | 0.000000  | 0.000000  | 0.000000  | -0.000558 |
| 18 | C | 0.000013  | 0.000046  | -0.000004 | -0.000012 | 0.000777  | -0.001371 |
| 19 | C | -0.000137 | -0.000027 | 0.000554  | -0.008864 | -0.048134 | 0.004032  |
| 20 | H | -0.000001 | 0.000016  | 0.000064  | -0.000839 | -0.004478 | -0.000514 |
| 21 | C | 0.000005  | -0.000008 | -0.000060 | -0.000818 | 0.006787  | 0.000023  |
| 22 | C | -0.000024 | -0.000010 | 0.000079  | -0.001733 | -0.000732 | 0.000002  |
| 23 | C | 0.000002  | 0.000032  | 0.000034  | -0.001635 | -0.000218 | -0.000023 |
| 24 | C | 0.000009  | -0.000004 | -0.000008 | -0.000307 | -0.000011 | 0.000001  |
| 25 | C | 0.000000  | 0.000000  | -0.000003 | -0.000015 | 0.000004  | 0.000000  |
| 26 | C | -0.000001 | 0.000000  | 0.000001  | 0.000016  | 0.000011  | 0.000000  |
| 27 | C | -0.000001 | 0.000001  | 0.000036  | -0.000374 | -0.000013 | -0.000001 |
| 28 | H | 0.353836  | -0.028973 | -0.032643 | 0.003070  | -0.000101 | 0.006096  |
| 29 | H | -0.026117 | 0.354351  | 0.005576  | -0.000133 | 0.002266  | -0.030895 |
| 30 | H | -0.030873 | 0.002973  | 0.381729  | -0.043824 | 0.002225  | 0.008467  |
| 31 | H | -0.004651 | 0.004033  | -0.023580 | 0.348439  | -0.021488 | -0.006079 |
| 32 | H | 0.000342  | 0.008317  | 0.002310  | -0.075469 | 0.404219  | -0.071924 |
| 33 | H | 0.003334  | -0.038238 | 0.006668  | 0.005548  | -0.040894 | 0.385565  |
| 34 | H | -0.000003 | 0.000151  | 0.000032  | -0.000222 | -0.005903 | -0.001737 |
| 35 | H | 0.000000  | -0.000009 | 0.000004  | -0.000296 | 0.006029  | 0.000251  |
| 36 | H | 0.000009  | 0.000321  | 0.000001  | -0.000038 | 0.000120  | -0.000161 |
| 37 | H | 0.000000  | -0.000020 | 0.000000  | 0.000000  | 0.000001  | -0.000001 |
| 38 | H | 0.000000  | -0.000001 | 0.000000  | 0.000000  | 0.000000  | 0.000000  |
| 39 | H | 0.000000  | 0.000001  | 0.000000  | 0.000000  | 0.000000  | -0.000003 |
| 40 | H | 0.000000  | 0.000006  | 0.000000  | 0.000001  | -0.000018 | -0.000086 |
| 41 | H | 0.000000  | 0.000000  | 0.000000  | 0.000110  | 0.000024  | 0.000001  |
| 42 | H | 0.000000  | 0.000000  | 0.000001  | -0.000021 | -0.000163 | 0.000000  |
| 43 | H | -0.000003 | -0.000002 | 0.000002  | -0.000022 | 0.000040  | -0.000007 |
| 44 | H | 0.000001  | 0.000000  | 0.000000  | -0.000002 | 0.000000  | 0.000000  |
| 45 | H | 0.000000  | 0.000000  | 0.000000  | 0.000000  | 0.000000  | 0.000000  |
| 46 | H | 0.000000  | 0.000000  | 0.000000  | -0.000001 | 0.000000  | 0.000000  |
| 47 | H | 0.000000  | 0.000000  | -0.000001 | 0.000117  | 0.000000  | 0.000000  |
|    |   | 7         | 8         | 9         | 10        | 11        | 12        |
| 1  | C | -0.090523 | 0.005953  | -0.000513 | 0.000160  | -0.000138 | -0.000023 |
| 2  | C | -0.103723 | 0.001654  | 0.001740  | -0.000026 | -0.000042 | -0.000127 |
| 3  | C | 0.204745  | 0.002803  | 0.008239  | 0.004499  | 0.004712  | -0.000291 |
| 4  | C | -0.100224 | 0.078672  | -0.049670 | -0.123312 | -0.137410 | 0.007353  |
| 5  | C | -0.072092 | -0.022848 | 0.114578  | 0.002662  | 0.014676  | -0.054708 |
| 6  | C | 0.197880  | 0.001484  | -0.017588 | -0.000186 | 0.000477  | -0.004983 |
| 7  | O | 8.468555  | 0.004684  | 0.004171  | -0.000097 | -0.000031 | 0.000014  |
| 8  | C | 0.004684  | 4.741111  | -0.012517 | 0.571142  | 0.095769  | 0.000481  |
| 9  | N | 0.004171  | -0.012517 | 7.388014  | -0.000043 | -0.042396 | 0.234073  |
| 10 | O | -0.000097 | 0.571142  | -0.000043 | 8.097637  | -0.093770 | 0.000004  |
| 11 | O | -0.000031 | 0.095769  | -0.042396 | -0.093770 | 8.639044  | 0.000999  |
| 12 | C | 0.000014  | 0.000481  | 0.234073  | 0.000004  | 0.000999  | 5.162184  |
| 13 | C | 0.000046  | -0.000012 | -0.067450 | 0.000000  | -0.000108 | 0.270771  |
| 14 | C | 0.000014  | -0.000001 | 0.006720  | 0.000000  | 0.000000  | -0.052758 |
| 15 | C | 0.000000  | 0.000000  | 0.000454  | 0.000000  | 0.000000  | 0.005934  |
| 16 | C | 0.000000  | 0.000000  | -0.000010 | 0.000000  | 0.000000  | 0.000382  |
| 17 | C | 0.000000  | 0.000000  | -0.000092 | 0.000000  | 0.000000  | 0.006684  |
| 18 | C | 0.000022  | 0.000000  | -0.000490 | 0.000000  | 0.000000  | -0.037044 |
| 19 | C | -0.000177 | -0.003527 | 0.190428  | 0.001013  | 0.143030  | -0.028322 |



|    |   |           |           |           |           |           |           |
|----|---|-----------|-----------|-----------|-----------|-----------|-----------|
| 20 | H | 0.000002  | 0.000631  | -0.065139 | -0.000083 | -0.039818 | -0.001346 |
| 21 | C | 0.000002  | -0.000361 | -0.061525 | 0.000044  | -0.058907 | -0.002160 |
| 22 | C | -0.000001 | 0.001365  | -0.008901 | -0.000094 | -0.003109 | 0.000419  |
| 23 | C | 0.000000  | 0.000030  | 0.008208  | -0.000001 | -0.000250 | -0.000079 |
| 24 | C | 0.000000  | -0.000011 | 0.000026  | 0.000000  | 0.000014  | 0.000000  |
| 25 | C | 0.000000  | -0.000020 | -0.000005 | 0.000000  | 0.000000  | 0.000000  |
| 26 | C | 0.000000  | 0.000058  | 0.000018  | -0.000036 | -0.000012 | 0.000000  |
| 27 | C | 0.000000  | 0.003075  | -0.000187 | -0.000376 | 0.003559  | -0.000004 |
| 28 | H | 0.004115  | -0.000108 | -0.000015 | 0.000003  | 0.000000  | 0.000000  |
| 29 | H | 0.002912  | 0.000003  | 0.000054  | 0.000000  | 0.000000  | -0.000054 |
| 30 | H | -0.022316 | -0.000010 | -0.000083 | 0.006416  | 0.000170  | 0.000003  |
| 31 | H | 0.003394  | -0.031329 | 0.001903  | 0.000584  | -0.000011 | 0.000517  |
| 32 | H | 0.004115  | 0.003091  | -0.080344 | -0.000137 | -0.000312 | -0.001672 |
| 33 | H | -0.022102 | -0.000058 | 0.000268  | 0.000002  | -0.000003 | 0.000678  |
| 34 | H | -0.000002 | -0.000073 | -0.060886 | 0.000000  | -0.000049 | 0.361137  |
| 35 | H | 0.000001  | -0.000005 | -0.042196 | 0.000000  | 0.000090  | 0.374015  |
| 36 | H | 0.000000  | 0.000001  | 0.003776  | 0.000000  | 0.000000  | -0.007074 |
| 37 | H | 0.000000  | 0.000000  | 0.000002  | 0.000000  | 0.000000  | -0.000172 |
| 38 | H | 0.000000  | 0.000000  | 0.000000  | 0.000000  | 0.000000  | 0.000003  |
| 39 | H | 0.000000  | 0.000000  | 0.000001  | 0.000000  | 0.000000  | -0.000177 |
| 40 | H | 0.000000  | 0.000000  | 0.000037  | 0.000000  | 0.000000  | -0.007192 |
| 41 | H | 0.000000  | 0.000004  | -0.003266 | 0.000000  | 0.003061  | 0.000883  |
| 42 | H | 0.000000  | -0.000126 | 0.004486  | -0.000008 | -0.000574 | -0.000097 |
| 43 | H | 0.000000  | 0.000005  | 0.000798  | 0.000000  | 0.000010  | 0.000163  |
| 44 | H | 0.000000  | 0.000000  | -0.000002 | 0.000000  | 0.000000  | 0.000000  |
| 45 | H | 0.000000  | 0.000000  | 0.000000  | 0.000000  | 0.000000  | 0.000000  |
| 46 | H | 0.000000  | -0.000004 | 0.000000  | 0.000001  | -0.000002 | 0.000000  |
| 47 | H | 0.000000  | 0.000784  | 0.000027  | 0.000023  | 0.001304  | 0.000000  |
|    |   | 13        | 14        | 15        | 16        | 17        | 18        |
| 1  | C | 0.000028  | -0.000027 | 0.000003  | 0.000002  | 0.000001  | 0.000013  |
| 2  | C | -0.000172 | 0.000847  | -0.000973 | -0.000199 | 0.000046  | 0.000046  |
| 3  | C | -0.000044 | 0.000016  | 0.000002  | 0.000000  | 0.000000  | -0.000004 |
| 4  | C | 0.000154  | -0.000131 | -0.000005 | 0.000000  | 0.000000  | -0.000012 |
| 5  | C | -0.003682 | -0.000972 | -0.000009 | 0.000006  | 0.000006  | 0.000777  |
| 6  | C | 0.004991  | -0.000417 | -0.000173 | -0.000041 | -0.000558 | -0.001371 |
| 7  | O | 0.000046  | 0.000014  | 0.000000  | 0.000000  | 0.000000  | 0.000022  |
| 8  | C | -0.000012 | -0.000001 | 0.000000  | 0.000000  | 0.000000  | 0.000000  |
| 9  | N | -0.067450 | 0.006720  | 0.000454  | -0.000010 | -0.000092 | -0.000490 |
| 10 | O | 0.000000  | 0.000000  | 0.000000  | 0.000000  | 0.000000  | 0.000000  |
| 11 | O | -0.000108 | 0.000000  | 0.000000  | 0.000000  | 0.000000  | 0.000000  |
| 12 | C | 0.270771  | -0.052758 | 0.005934  | 0.000382  | 0.006684  | -0.037044 |
| 13 | C | 4.932786  | 0.517012  | -0.039218 | -0.030422 | -0.045458 | 0.530349  |
| 14 | C | 0.517012  | 4.996432  | 0.507339  | -0.058144 | -0.039275 | -0.061671 |
| 15 | C | -0.039218 | 0.507339  | 4.946126  | 0.531979  | -0.049451 | -0.040891 |
| 16 | C | -0.030422 | -0.058144 | 0.531979  | 4.921792  | 0.540061  | -0.058731 |
| 17 | C | -0.045458 | -0.039275 | -0.049451 | 0.540061  | 4.937694  | 0.508349  |
| 18 | C | 0.530349  | -0.061671 | -0.040891 | -0.058731 | 0.508349  | 5.001811  |
| 19 | C | 0.005502  | 0.000159  | 0.000002  | 0.000000  | 0.000001  | -0.000070 |
| 20 | H | -0.000225 | 0.000071  | 0.000000  | 0.000000  | 0.000000  | 0.000001  |
| 21 | C | -0.000236 | 0.000014  | 0.000000  | 0.000000  | 0.000000  | -0.000003 |
| 22 | C | 0.000064  | -0.000026 | 0.000000  | 0.000000  | 0.000000  | 0.000000  |
| 23 | C | -0.000017 | -0.000802 | 0.000011  | 0.000000  | 0.000000  | 0.000000  |
| 24 | C | -0.000001 | -0.000018 | 0.000000  | 0.000000  | 0.000000  | 0.000000  |
| 25 | C | 0.000000  | 0.000000  | 0.000000  | 0.000000  | 0.000000  | 0.000000  |
| 26 | C | 0.000000  | 0.000000  | 0.000000  | 0.000000  | 0.000000  | 0.000000  |
| 27 | C | 0.000000  | 0.000000  | 0.000000  | 0.000000  | 0.000000  | 0.000000  |
| 28 | H | 0.000000  | 0.000000  | -0.000001 | 0.000000  | 0.000000  | 0.000000  |
| 29 | H | -0.000337 | 0.002145  | 0.002993  | 0.000692  | -0.000005 | -0.000251 |
| 30 | H | 0.000000  | 0.000000  | 0.000000  | 0.000000  | 0.000000  | 0.000000  |
| 31 | H | -0.000085 | 0.000032  | 0.000002  | 0.000000  | 0.000000  | 0.000000  |
| 32 | H | -0.002143 | 0.000213  | 0.000004  | -0.000001 | 0.000005  | -0.000005 |
| 33 | H | 0.000226  | -0.000534 | -0.000181 | 0.000055  | 0.000893  | 0.005254  |

|    |   |           |           |           |           |           |           |
|----|---|-----------|-----------|-----------|-----------|-----------|-----------|
| 34 | H | -0.057181 | 0.006328  | -0.000112 | -0.000020 | 0.000502  | -0.001777 |
| 35 | H | -0.034041 | -0.006589 | -0.000010 | 0.000028  | -0.000266 | 0.000645  |
| 36 | H | -0.038427 | 0.353751  | -0.034611 | 0.004467  | 0.000391  | 0.004738  |
| 37 | H | 0.003535  | -0.031394 | 0.356429  | -0.033658 | 0.004262  | 0.000749  |
| 38 | H | 0.000423  | 0.004685  | -0.034654 | 0.357911  | -0.034372 | 0.004811  |
| 39 | H | 0.003906  | 0.000694  | 0.004348  | -0.034452 | 0.355872  | -0.030735 |
| 40 | H | -0.035947 | 0.004887  | 0.000342  | 0.004402  | -0.033516 | 0.354621  |
| 41 | H | -0.000198 | 0.000036  | 0.000001  | 0.000000  | 0.000000  | -0.000001 |
| 42 | H | 0.000001  | 0.000000  | 0.000000  | 0.000000  | 0.000000  | 0.000000  |
| 43 | H | -0.000171 | 0.000048  | 0.000004  | 0.000000  | 0.000000  | -0.000001 |
| 44 | H | 0.000000  | 0.000003  | 0.000000  | 0.000000  | 0.000000  | 0.000000  |
| 45 | H | 0.000000  | 0.000000  | 0.000000  | 0.000000  | 0.000000  | 0.000000  |
| 46 | H | 0.000000  | 0.000000  | 0.000000  | 0.000000  | 0.000000  | 0.000000  |
| 47 | H | 0.000000  | 0.000000  | 0.000000  | 0.000000  | 0.000000  | 0.000000  |
|    |   | 19        | 20        | 21        | 22        | 23        | 24        |
| 1  | C | -0.000137 | -0.000001 | 0.000005  | -0.000024 | 0.000002  | 0.000009  |
| 2  | C | -0.000027 | 0.000016  | -0.000008 | -0.000010 | 0.000032  | -0.000004 |
| 3  | C | 0.000554  | 0.000064  | -0.000060 | 0.000079  | 0.000034  | -0.000008 |
| 4  | C | -0.008864 | -0.000839 | -0.000818 | -0.001733 | -0.001635 | -0.000307 |
| 5  | C | -0.048134 | -0.004478 | 0.006787  | -0.000732 | -0.000218 | -0.000011 |
| 6  | C | 0.004032  | -0.000514 | 0.000023  | 0.000002  | -0.000023 | 0.000001  |
| 7  | O | -0.000177 | 0.000002  | 0.000002  | -0.000001 | 0.000000  | 0.000000  |
| 8  | C | -0.003527 | 0.000631  | -0.000361 | 0.001365  | 0.000030  | -0.000011 |
| 9  | N | 0.190428  | -0.065139 | -0.061525 | -0.008901 | 0.008208  | 0.000026  |
| 10 | O | 0.001013  | -0.000083 | 0.000044  | -0.000094 | -0.000001 | 0.000000  |
| 11 | O | 0.143030  | -0.039818 | -0.058907 | -0.003109 | -0.000250 | 0.000014  |
| 12 | C | -0.028322 | -0.001346 | -0.002160 | 0.000419  | -0.000079 | 0.000000  |
| 13 | C | 0.005502  | -0.000225 | -0.000236 | 0.000064  | -0.000017 | -0.000001 |
| 14 | C | 0.000159  | 0.000071  | 0.000014  | -0.000026 | -0.000802 | -0.000018 |
| 15 | C | 0.000002  | 0.000000  | 0.000000  | 0.000000  | 0.000011  | 0.000000  |
| 16 | C | 0.000000  | 0.000000  | 0.000000  | 0.000000  | 0.000000  | 0.000000  |
| 17 | C | 0.000001  | 0.000000  | 0.000000  | 0.000000  | 0.000000  | 0.000000  |
| 18 | C | -0.000070 | 0.000001  | -0.000003 | 0.000000  | 0.000000  | 0.000000  |
| 19 | C | 4.972168  | 0.382115  | 0.279632  | -0.041893 | -0.003879 | 0.000014  |
| 20 | H | 0.382115  | 0.574670  | -0.064244 | 0.005353  | 0.000142  | 0.000003  |
| 21 | C | 0.279632  | -0.064244 | 5.300439  | 0.300605  | -0.045001 | 0.005916  |
| 22 | C | -0.041893 | 0.005353  | 0.300605  | 4.860439  | 0.535533  | -0.044460 |
| 23 | C | -0.003879 | 0.000142  | -0.045001 | 0.535533  | 4.974567  | 0.509766  |
| 24 | C | 0.000014  | 0.000003  | 0.005916  | -0.044460 | 0.509766  | 4.949150  |
| 25 | C | 0.000024  | 0.000000  | 0.000463  | -0.031077 | -0.058593 | 0.535946  |
| 26 | C | 0.000019  | 0.000002  | 0.005962  | -0.045323 | -0.039097 | -0.050127 |
| 27 | C | -0.005117 | 0.000076  | -0.047413 | 0.531372  | -0.062164 | -0.039924 |
| 28 | H | 0.000000  | 0.000000  | 0.000000  | -0.000001 | 0.000001  | 0.000008  |
| 29 | H | 0.000001  | 0.000000  | 0.000000  | 0.000000  | 0.000001  | 0.000000  |
| 30 | H | -0.000020 | 0.000000  | 0.000000  | 0.000000  | -0.000001 | 0.000000  |
| 31 | H | -0.001402 | 0.000168  | -0.000715 | 0.003559  | 0.004189  | 0.001202  |
| 32 | H | -0.004907 | 0.006695  | -0.000661 | -0.000012 | 0.000020  | 0.000000  |
| 33 | H | -0.000075 | -0.000010 | 0.000001  | 0.000000  | 0.000000  | 0.000000  |
| 34 | H | -0.004820 | 0.013348  | -0.000880 | -0.000015 | 0.000014  | 0.000000  |
| 35 | H | -0.001627 | -0.002994 | 0.002224  | 0.000046  | -0.000067 | -0.000001 |
| 36 | H | -0.000162 | 0.000023  | -0.000059 | 0.000013  | 0.000975  | 0.000078  |
| 37 | H | 0.000000  | 0.000000  | 0.000000  | 0.000000  | 0.000000  | 0.000000  |
| 38 | H | 0.000000  | 0.000000  | 0.000000  | 0.000000  | 0.000000  | 0.000000  |
| 39 | H | 0.000000  | 0.000000  | 0.000000  | 0.000000  | 0.000000  | 0.000000  |
| 40 | H | 0.000001  | 0.000007  | 0.000000  | 0.000000  | 0.000000  | 0.000000  |
| 41 | H | -0.028220 | -0.000771 | 0.356868  | -0.032994 | -0.004686 | 0.000299  |
| 42 | H | -0.030607 | -0.000562 | 0.356786  | -0.039633 | 0.004170  | -0.000224 |
| 43 | H | 0.000134  | -0.000004 | -0.006661 | -0.036117 | 0.353495  | -0.035449 |
| 44 | H | 0.000000  | 0.000000  | -0.000178 | 0.003877  | -0.030425 | 0.355037  |
| 45 | H | 0.000000  | 0.000000  | 0.000004  | 0.000448  | 0.004671  | -0.034692 |
| 46 | H | 0.000000  | 0.000000  | -0.000174 | 0.003915  | 0.000700  | 0.004346  |
| 47 | H | -0.000064 | -0.000024 | -0.006364 | -0.038041 | 0.004635  | 0.000326  |

|      | 25        | 26        | 27        | 28        | 29        | 30        |
|------|-----------|-----------|-----------|-----------|-----------|-----------|
| 1 C  | 0.000000  | -0.000001 | -0.000001 | 0.353836  | -0.026117 | -0.030873 |
| 2 C  | 0.000000  | 0.000000  | 0.000001  | -0.028973 | 0.354351  | 0.002973  |
| 3 C  | -0.000003 | 0.000001  | 0.000036  | -0.032643 | 0.005576  | 0.381729  |
| 4 C  | -0.000015 | 0.000016  | -0.000374 | 0.003070  | -0.000133 | -0.043824 |
| 5 C  | 0.000004  | 0.000011  | -0.000013 | -0.000101 | 0.002266  | 0.002225  |
| 6 C  | 0.000000  | 0.000000  | -0.000001 | 0.006096  | -0.030895 | 0.008467  |
| 7 O  | 0.000000  | 0.000000  | 0.000000  | 0.004115  | 0.002912  | -0.022316 |
| 8 C  | -0.000020 | 0.000058  | 0.003075  | -0.000108 | 0.000003  | -0.000010 |
| 9 N  | -0.000005 | 0.000018  | -0.000187 | -0.000015 | 0.000054  | -0.000083 |
| 10 O | 0.000000  | -0.000036 | -0.000376 | 0.000003  | 0.000000  | 0.006416  |
| 11 O | 0.000000  | -0.000012 | 0.003559  | 0.000000  | 0.000000  | 0.000170  |
| 12 C | 0.000000  | 0.000000  | -0.000004 | 0.000000  | -0.000054 | 0.000003  |
| 13 C | 0.000000  | 0.000000  | 0.000000  | 0.000000  | -0.000337 | 0.000000  |
| 14 C | 0.000000  | 0.000000  | 0.000000  | 0.000000  | 0.002145  | 0.000000  |
| 15 C | 0.000000  | 0.000000  | 0.000000  | -0.000001 | 0.002993  | 0.000000  |
| 16 C | 0.000000  | 0.000000  | 0.000000  | 0.000000  | 0.000692  | 0.000000  |
| 17 C | 0.000000  | 0.000000  | 0.000000  | 0.000000  | -0.000005 | 0.000000  |
| 18 C | 0.000000  | 0.000000  | 0.000000  | 0.000000  | -0.000251 | 0.000000  |
| 19 C | 0.000024  | 0.000019  | -0.005117 | 0.000000  | 0.000001  | -0.000020 |
| 20 H | 0.000000  | 0.000002  | 0.000076  | 0.000000  | 0.000000  | 0.000000  |
| 21 C | 0.000463  | 0.005962  | -0.047413 | 0.000000  | 0.000000  | 0.000000  |
| 22 C | -0.031077 | -0.045323 | 0.531372  | -0.000001 | 0.000000  | 0.000000  |
| 23 C | -0.058593 | -0.039097 | -0.062164 | 0.000001  | 0.000001  | -0.000001 |
| 24 C | 0.535946  | -0.050127 | -0.039924 | 0.000008  | 0.000000  | 0.000000  |
| 25 C | 4.923993  | 0.537812  | -0.058755 | 0.000002  | 0.000000  | 0.000000  |
| 26 C | 0.537812  | 4.942936  | 0.508510  | 0.000000  | 0.000000  | 0.000001  |
| 27 C | -0.058755 | 0.508510  | 5.003098  | 0.000000  | 0.000000  | 0.000001  |
| 28 H | 0.000002  | 0.000000  | 0.000000  | 0.516216  | -0.001734 | -0.000909 |
| 29 H | 0.000000  | 0.000000  | 0.000000  | -0.001734 | 0.514785  | -0.000125 |
| 30 H | 0.000000  | 0.000001  | 0.000001  | -0.000909 | -0.000125 | 0.511384  |
| 31 H | 0.000224  | 0.000227  | 0.000109  | 0.001154  | -0.000093 | 0.002224  |
| 32 H | 0.000000  | 0.000000  | -0.000002 | 0.000011  | -0.000064 | -0.000225 |
| 33 H | 0.000000  | 0.000000  | 0.000000  | -0.000116 | -0.001083 | -0.000059 |
| 34 H | 0.000000  | 0.000000  | 0.000000  | 0.000000  | 0.000001  | 0.000000  |
| 35 H | 0.000000  | 0.000000  | -0.000001 | 0.000000  | -0.000001 | 0.000000  |
| 36 H | 0.000000  | 0.000000  | 0.000000  | 0.000001  | 0.000038  | 0.000000  |
| 37 H | 0.000000  | 0.000000  | 0.000000  | 0.000000  | 0.000063  | 0.000000  |
| 38 H | 0.000000  | 0.000000  | 0.000000  | 0.000000  | 0.000002  | 0.000000  |
| 39 H | 0.000000  | 0.000000  | 0.000000  | 0.000000  | -0.000001 | 0.000000  |
| 40 H | 0.000000  | 0.000000  | 0.000000  | 0.000000  | 0.000000  | 0.000000  |
| 41 H | 0.000004  | -0.000219 | 0.003891  | 0.000000  | 0.000000  | 0.000000  |
| 42 H | 0.000001  | 0.000352  | -0.004524 | 0.000000  | 0.000000  | 0.000000  |
| 43 H | 0.004545  | 0.000357  | 0.004694  | 0.000000  | -0.000001 | 0.000000  |
| 44 H | -0.034511 | 0.004315  | 0.000719  | 0.000000  | 0.000000  | 0.000000  |
| 45 H | 0.357728  | -0.034629 | 0.004757  | 0.000000  | 0.000000  | 0.000000  |
| 46 H | -0.034589 | 0.355525  | -0.030749 | 0.000000  | 0.000000  | 0.000000  |
| 47 H | 0.004537  | -0.034144 | 0.357311  | 0.000000  | 0.000000  | 0.000000  |
|      | 31        | 32        | 33        | 34        | 35        | 36        |
| 1 C  | -0.004651 | 0.000342  | 0.003334  | -0.000003 | 0.000000  | 0.000009  |
| 2 C  | 0.004033  | 0.008317  | -0.038238 | 0.000151  | -0.000009 | 0.000321  |
| 3 C  | -0.023580 | 0.002310  | 0.006668  | 0.000032  | 0.000004  | 0.000001  |
| 4 C  | 0.348439  | -0.075469 | 0.005548  | -0.000222 | -0.000296 | -0.000038 |
| 5 C  | -0.021488 | 0.404219  | -0.040894 | -0.005903 | 0.006029  | 0.000120  |
| 6 C  | -0.006079 | -0.071924 | 0.385565  | -0.001737 | 0.000251  | -0.000161 |
| 7 O  | 0.003394  | 0.004115  | -0.022102 | -0.000002 | 0.000001  | 0.000000  |
| 8 C  | -0.031329 | 0.003091  | -0.000058 | -0.000073 | -0.000005 | 0.000001  |
| 9 N  | 0.001903  | -0.080344 | 0.000268  | -0.060886 | -0.042196 | 0.003776  |
| 10 O | 0.000584  | -0.000137 | 0.000002  | 0.000000  | 0.000000  | 0.000000  |
| 11 O | -0.000011 | -0.000312 | -0.000003 | -0.000049 | 0.000090  | 0.000000  |
| 12 C | 0.000517  | -0.001672 | 0.000678  | 0.361137  | 0.374015  | -0.007074 |
| 13 C | -0.000085 | -0.002143 | 0.000226  | -0.057181 | -0.034041 | -0.038427 |

|    |   |           |           |           |           |           |           |
|----|---|-----------|-----------|-----------|-----------|-----------|-----------|
| 14 | C | 0.000032  | 0.000213  | -0.000534 | 0.006328  | -0.006589 | 0.353751  |
| 15 | C | 0.000002  | 0.000004  | -0.000181 | -0.000112 | -0.000010 | -0.034611 |
| 16 | C | 0.000000  | -0.000001 | 0.000055  | -0.000020 | 0.000028  | 0.004467  |
| 17 | C | 0.000000  | 0.000005  | 0.000893  | 0.000502  | -0.000266 | 0.000391  |
| 18 | C | 0.000000  | -0.000005 | 0.005254  | -0.001777 | 0.000645  | 0.004738  |
| 19 | C | -0.001402 | -0.004907 | -0.000075 | -0.004820 | -0.001627 | -0.000162 |
| 20 | H | 0.000168  | 0.006695  | -0.000010 | 0.013348  | -0.002994 | 0.000023  |
| 21 | C | -0.000715 | -0.000661 | 0.000001  | -0.000880 | 0.002224  | -0.000059 |
| 22 | C | 0.003559  | -0.000012 | 0.000000  | -0.000015 | 0.000046  | 0.000013  |
| 23 | C | 0.004189  | 0.000020  | 0.000000  | 0.000014  | -0.000067 | 0.000975  |
| 24 | C | 0.001202  | 0.000000  | 0.000000  | 0.000000  | -0.000001 | 0.000078  |
| 25 | C | 0.000224  | 0.000000  | 0.000000  | 0.000000  | 0.000000  | 0.000000  |
| 26 | C | 0.000227  | 0.000000  | 0.000000  | 0.000000  | 0.000000  | 0.000000  |
| 27 | C | 0.000109  | -0.000002 | 0.000000  | 0.000000  | -0.000001 | 0.000000  |
| 28 | H | 0.001154  | 0.000011  | -0.000116 | 0.000000  | 0.000000  | 0.000001  |
| 29 | H | -0.000093 | -0.000064 | -0.001083 | 0.000001  | -0.000001 | 0.000038  |
| 30 | H | 0.002224  | -0.000225 | -0.000059 | 0.000000  | 0.000000  | 0.000000  |
| 31 | H | 0.484667  | 0.004373  | -0.000064 | 0.000034  | -0.000026 | 0.000071  |
| 32 | H | 0.004373  | 0.616247  | -0.006548 | 0.012943  | -0.000429 | 0.000020  |
| 33 | H | -0.000064 | -0.006548 | 0.518486  | -0.000277 | 0.000003  | -0.000011 |
| 34 | H | 0.000034  | 0.012943  | -0.000277 | 0.629614  | -0.041590 | 0.000236  |
| 35 | H | -0.000026 | -0.000429 | 0.000003  | -0.041590 | 0.561071  | 0.000481  |
| 36 | H | 0.000071  | 0.000020  | -0.000011 | 0.000236  | 0.000481  | 0.554103  |
| 37 | H | 0.000000  | 0.000000  | 0.000000  | 0.000002  | 0.000001  | -0.003534 |
| 38 | H | 0.000000  | 0.000000  | -0.000001 | 0.000000  | 0.000000  | -0.000158 |
| 39 | H | 0.000000  | 0.000000  | 0.000004  | -0.000001 | 0.000003  | 0.000011  |
| 40 | H | 0.000000  | 0.000054  | 0.000385  | 0.005888  | 0.000094  | -0.000149 |
| 41 | H | 0.000003  | -0.000014 | 0.000000  | -0.000023 | 0.003476  | 0.000078  |
| 42 | H | 0.000057  | 0.000042  | 0.000000  | 0.000049  | -0.000201 | 0.000003  |
| 43 | H | -0.000019 | 0.000002  | 0.000000  | 0.000004  | 0.000129  | 0.004288  |
| 44 | H | 0.000011  | 0.000000  | 0.000000  | 0.000000  | 0.000000  | -0.000004 |
| 45 | H | -0.000001 | 0.000000  | 0.000000  | 0.000000  | 0.000000  | 0.000000  |
| 46 | H | 0.000004  | 0.000000  | 0.000000  | 0.000000  | 0.000000  | 0.000000  |
| 47 | H | -0.000019 | 0.000000  | 0.000000  | 0.000000  | 0.000000  | 0.000000  |
|    |   | 37        | 38        | 39        | 40        | 41        | 42        |
| 1  | C | 0.000000  | 0.000000  | 0.000000  | 0.000000  | 0.000000  | 0.000000  |
| 2  | C | -0.000020 | -0.000001 | 0.000001  | 0.000006  | 0.000000  | 0.000000  |
| 3  | C | 0.000000  | 0.000000  | 0.000000  | 0.000000  | 0.000000  | 0.000001  |
| 4  | C | 0.000000  | 0.000000  | 0.000000  | 0.000001  | 0.000110  | -0.000021 |
| 5  | C | 0.000001  | 0.000000  | 0.000000  | -0.000018 | 0.000024  | -0.000163 |
| 6  | C | -0.000001 | 0.000000  | -0.000003 | -0.000086 | 0.000001  | 0.000000  |
| 7  | O | 0.000000  | 0.000000  | 0.000000  | 0.000000  | 0.000000  | 0.000000  |
| 8  | C | 0.000000  | 0.000000  | 0.000000  | 0.000000  | 0.000004  | -0.000126 |
| 9  | N | 0.000002  | 0.000000  | 0.000001  | 0.000037  | -0.003266 | 0.004486  |
| 10 | O | 0.000000  | 0.000000  | 0.000000  | 0.000000  | 0.000000  | -0.000008 |
| 11 | O | 0.000000  | 0.000000  | 0.000000  | 0.000000  | 0.003061  | -0.000574 |
| 12 | C | -0.000172 | 0.000003  | -0.000177 | -0.007192 | 0.000883  | -0.000097 |
| 13 | C | 0.003535  | 0.000423  | 0.003906  | -0.035947 | -0.000198 | 0.000001  |
| 14 | C | -0.031394 | 0.004685  | 0.000694  | 0.004887  | 0.000036  | 0.000000  |
| 15 | C | 0.356429  | -0.034654 | 0.004348  | 0.000342  | 0.000001  | 0.000000  |
| 16 | C | -0.033658 | 0.357911  | -0.034452 | 0.004402  | 0.000000  | 0.000000  |
| 17 | C | 0.004262  | -0.034372 | 0.355872  | -0.033516 | 0.000000  | 0.000000  |
| 18 | C | 0.000749  | 0.004811  | -0.030735 | 0.354621  | -0.000001 | 0.000000  |
| 19 | C | 0.000000  | 0.000000  | 0.000000  | 0.000001  | -0.028220 | -0.030607 |
| 20 | H | 0.000000  | 0.000000  | 0.000000  | 0.000007  | -0.000771 | -0.000562 |
| 21 | C | 0.000000  | 0.000000  | 0.000000  | 0.000000  | 0.356868  | 0.356786  |
| 22 | C | 0.000000  | 0.000000  | 0.000000  | 0.000000  | -0.032994 | -0.039633 |
| 23 | C | 0.000000  | 0.000000  | 0.000000  | 0.000000  | -0.004686 | 0.004170  |
| 24 | C | 0.000000  | 0.000000  | 0.000000  | 0.000000  | 0.000299  | -0.000224 |
| 25 | C | 0.000000  | 0.000000  | 0.000000  | 0.000000  | 0.000004  | 0.000001  |
| 26 | C | 0.000000  | 0.000000  | 0.000000  | 0.000000  | -0.000219 | 0.000352  |
| 27 | C | 0.000000  | 0.000000  | 0.000000  | 0.000000  | 0.003891  | -0.004524 |

|    |   |           |           |           |           |           |           |
|----|---|-----------|-----------|-----------|-----------|-----------|-----------|
| 28 | H | 0.000000  | 0.000000  | 0.000000  | 0.000000  | 0.000000  | 0.000000  |
| 29 | H | 0.000063  | 0.000002  | -0.000001 | 0.000000  | 0.000000  | 0.000000  |
| 30 | H | 0.000000  | 0.000000  | 0.000000  | 0.000000  | 0.000000  | 0.000000  |
| 31 | H | 0.000000  | 0.000000  | 0.000000  | 0.000000  | 0.000003  | 0.000057  |
| 32 | H | 0.000000  | 0.000000  | 0.000000  | 0.000054  | -0.000014 | 0.000042  |
| 33 | H | 0.000000  | -0.000001 | 0.000004  | 0.000385  | 0.000000  | 0.000000  |
| 34 | H | 0.000002  | 0.000000  | -0.000001 | 0.005888  | -0.000023 | 0.000049  |
| 35 | H | 0.000001  | 0.000000  | 0.000003  | 0.000094  | 0.003476  | -0.000201 |
| 36 | H | -0.003534 | -0.000158 | 0.000011  | -0.000149 | 0.000078  | 0.000003  |
| 37 | H | 0.551162  | -0.003987 | -0.000165 | 0.000011  | 0.000000  | 0.000000  |
| 38 | H | -0.003987 | 0.555196  | -0.004092 | -0.000158 | 0.000000  | 0.000000  |
| 39 | H | -0.000165 | -0.004092 | 0.552800  | -0.003801 | 0.000000  | 0.000000  |
| 40 | H | 0.000011  | -0.000158 | -0.003801 | 0.550573  | 0.000000  | 0.000000  |
| 41 | H | 0.000000  | 0.000000  | 0.000000  | 0.000000  | 0.564137  | -0.033710 |
| 42 | H | 0.000000  | 0.000000  | 0.000000  | 0.000000  | -0.033710 | 0.576972  |
| 43 | H | -0.000005 | 0.000000  | 0.000000  | 0.000000  | 0.003076  | 0.000081  |
| 44 | H | 0.000000  | 0.000000  | 0.000000  | 0.000000  | -0.000002 | 0.000003  |
| 45 | H | 0.000000  | 0.000000  | 0.000000  | 0.000000  | 0.000000  | 0.000000  |
| 46 | H | 0.000000  | 0.000000  | 0.000000  | 0.000000  | 0.000002  | -0.000002 |
| 47 | H | 0.000000  | 0.000000  | 0.000000  | 0.000000  | 0.000111  | 0.003816  |
|    |   | 43        | 44        | 45        | 46        | 47        |           |
| 1  | C | -0.000003 | 0.000001  | 0.000000  | 0.000000  | 0.000000  | 0.000000  |
| 2  | C | -0.000002 | 0.000000  | 0.000000  | 0.000000  | 0.000000  | 0.000000  |
| 3  | C | 0.000002  | 0.000000  | 0.000000  | 0.000000  | -0.000001 | 0.000000  |
| 4  | C | -0.000022 | -0.000002 | 0.000000  | -0.000001 | 0.000117  | 0.000000  |
| 5  | C | 0.000040  | 0.000000  | 0.000000  | 0.000000  | 0.000000  | 0.000000  |
| 6  | C | -0.000007 | 0.000000  | 0.000000  | 0.000000  | 0.000000  | 0.000000  |
| 7  | O | 0.000000  | 0.000000  | 0.000000  | 0.000000  | 0.000000  | 0.000000  |
| 8  | C | 0.000005  | 0.000000  | 0.000000  | -0.000004 | 0.000784  | 0.000000  |
| 9  | N | 0.000798  | -0.000002 | 0.000000  | 0.000000  | 0.000027  | 0.000000  |
| 10 | O | 0.000000  | 0.000000  | 0.000000  | 0.000001  | 0.000023  | 0.000000  |
| 11 | O | 0.000010  | 0.000000  | 0.000000  | -0.000002 | 0.001304  | 0.000000  |
| 12 | C | 0.000163  | 0.000000  | 0.000000  | 0.000000  | 0.000000  | 0.000000  |
| 13 | C | -0.000171 | 0.000000  | 0.000000  | 0.000000  | 0.000000  | 0.000000  |
| 14 | C | 0.000048  | 0.000003  | 0.000000  | 0.000000  | 0.000000  | 0.000000  |
| 15 | C | 0.000004  | 0.000000  | 0.000000  | 0.000000  | 0.000000  | 0.000000  |
| 16 | C | 0.000000  | 0.000000  | 0.000000  | 0.000000  | 0.000000  | 0.000000  |
| 17 | C | 0.000000  | 0.000000  | 0.000000  | 0.000000  | 0.000000  | 0.000000  |
| 18 | C | -0.000001 | 0.000000  | 0.000000  | 0.000000  | 0.000000  | 0.000000  |
| 19 | C | 0.000134  | 0.000000  | 0.000000  | 0.000000  | -0.000064 | 0.000000  |
| 20 | H | -0.000004 | 0.000000  | 0.000000  | 0.000000  | -0.000024 | 0.000000  |
| 21 | C | -0.006661 | -0.000178 | 0.000004  | -0.000174 | -0.006364 | 0.000000  |
| 22 | C | -0.036117 | 0.003877  | 0.000448  | 0.003915  | -0.038041 | 0.000000  |
| 23 | C | 0.353495  | -0.030425 | 0.004671  | 0.000700  | 0.004635  | 0.000000  |
| 24 | C | -0.035449 | 0.355037  | -0.034692 | 0.004346  | 0.000326  | 0.000000  |
| 25 | C | 0.004545  | -0.034511 | 0.357728  | -0.034589 | 0.004537  | 0.000000  |
| 26 | C | 0.000357  | 0.004315  | -0.034629 | 0.355525  | -0.034144 | 0.000000  |
| 27 | C | 0.004694  | 0.000719  | 0.004757  | -0.030749 | 0.357311  | 0.000000  |
| 28 | H | 0.000000  | 0.000000  | 0.000000  | 0.000000  | 0.000000  | 0.000000  |
| 29 | H | -0.000001 | 0.000000  | 0.000000  | 0.000000  | 0.000000  | 0.000000  |
| 30 | H | 0.000000  | 0.000000  | 0.000000  | 0.000000  | 0.000000  | 0.000000  |
| 31 | H | -0.000019 | 0.000011  | -0.000001 | 0.000004  | -0.000019 | 0.000000  |
| 32 | H | 0.000002  | 0.000000  | 0.000000  | 0.000000  | 0.000000  | 0.000000  |
| 33 | H | 0.000000  | 0.000000  | 0.000000  | 0.000000  | 0.000000  | 0.000000  |
| 34 | H | 0.000004  | 0.000000  | 0.000000  | 0.000000  | 0.000000  | 0.000000  |
| 35 | H | 0.000129  | 0.000000  | 0.000000  | 0.000000  | 0.000000  | 0.000000  |
| 36 | H | 0.004288  | -0.000004 | 0.000000  | 0.000000  | 0.000000  | 0.000000  |
| 37 | H | -0.000005 | 0.000000  | 0.000000  | 0.000000  | 0.000000  | 0.000000  |
| 38 | H | 0.000000  | 0.000000  | 0.000000  | 0.000000  | 0.000000  | 0.000000  |
| 39 | H | 0.000000  | 0.000000  | 0.000000  | 0.000000  | 0.000000  | 0.000000  |
| 40 | H | 0.000000  | 0.000000  | 0.000000  | 0.000000  | 0.000000  | 0.000000  |
| 41 | H | 0.003076  | -0.000002 | 0.000000  | 0.000002  | 0.000111  | 0.003816  |

|      |           |           |           |           |           |
|------|-----------|-----------|-----------|-----------|-----------|
| 42 H | 0.000081  | 0.000003  | 0.000000  | -0.000002 | 0.003816  |
| 43 H | 0.556403  | -0.003844 | -0.000162 | 0.000011  | -0.000153 |
| 44 H | -0.003844 | 0.556739  | -0.004084 | -0.000167 | 0.000011  |
| 45 H | -0.000162 | -0.004084 | 0.558389  | -0.004097 | -0.000159 |
| 46 H | 0.000011  | -0.000167 | -0.004097 | 0.555379  | -0.003937 |
| 47 H | -0.000153 | 0.000011  | -0.000159 | -0.003937 | 0.553602  |

Mulliken atomic charges:

|      |           |
|------|-----------|
| 1    |           |
| 1 C  | -0.076253 |
| 2 C  | -0.059554 |
| 3 C  | -0.063082 |
| 4 C  | -0.196548 |
| 5 C  | 0.043708  |
| 6 C  | -0.095452 |
| 7 O  | -0.483382 |
| 8 C  | 0.558209  |
| 9 N  | -0.454704 |
| 10 O | -0.466023 |
| 11 O | -0.529974 |
| 12 C | -0.228412 |
| 13 C | 0.085778  |
| 14 C | -0.148686 |
| 15 C | -0.155682 |
| 16 C | -0.146100 |
| 17 C | -0.151776 |
| 18 C | -0.179127 |
| 19 C | 0.233222  |
| 20 H | 0.197663  |
| 21 C | -0.319347 |
| 22 C | 0.077105  |
| 23 C | -0.154260 |
| 24 C | -0.156904 |
| 25 C | -0.147715 |
| 26 C | -0.152533 |
| 27 C | -0.171605 |
| 28 H | 0.180089  |
| 29 H | 0.175011  |
| 30 H | 0.182851  |
| 31 H | 0.228380  |
| 32 H | 0.181847  |
| 33 H | 0.182881  |
| 34 H | 0.145292  |
| 35 H | 0.181758  |
| 36 H | 0.156395  |
| 37 H | 0.156720  |
| 38 H | 0.154391  |
| 39 H | 0.155788  |
| 40 H | 0.159559  |
| 41 H | 0.168040  |
| 42 H | 0.163630  |
| 43 H | 0.154333  |
| 44 H | 0.152502  |
| 45 H | 0.151829  |
| 46 H | 0.153838  |
| 47 H | 0.156301  |

Sum of Mulliken charges= 0.00000

Atomic charges with hydrogens summed into heavy atoms:

|     |          |
|-----|----------|
| 1   |          |
| 1 C | 0.103837 |
| 2 C | 0.115458 |
| 3 C | 0.119769 |
| 4 C | 0.031832 |

5 C 0.225555  
6 C 0.087429  
7 O -0.483382  
8 C 0.558209  
9 N -0.454704  
10 O -0.466023  
11 O -0.529974  
12 C 0.098638  
13 C 0.085778  
14 C 0.007709  
15 C 0.001038  
16 C 0.008290  
17 C 0.004012  
18 C -0.019569  
19 C 0.430885  
20 H 0.000000  
21 C 0.012323  
22 C 0.077105  
23 C 0.000073  
24 C -0.004402  
25 C 0.004114  
26 C 0.001305  
27 C -0.015304  
28 H 0.000000  
29 H 0.000000  
30 H 0.000000  
31 H 0.000000  
32 H 0.000000  
33 H 0.000000  
34 H 0.000000  
35 H 0.000000  
36 H 0.000000  
37 H 0.000000  
38 H 0.000000  
39 H 0.000000  
40 H 0.000000  
41 H 0.000000  
42 H 0.000000  
43 H 0.000000  
44 H 0.000000  
45 H 0.000000  
46 H 0.000000  
47 H 0.000000

Sum of Mulliken charges= 0.00000

Electronic spatial extent (au):  $\langle R^{*2} \rangle = 8075.1749$

Charge= 0.0000 electrons

Dipole moment (field-independent basis, Debye):

X= -4.3859 Y= -6.4686 Z= 0.3458 Tot= 7.8229

Quadrupole moment (field-independent basis, Debye-Ang):

XX= -147.3652 YY= -172.4263 ZZ= -135.5372

XY= -8.0845 XZ= 7.9177 YZ= -0.0420

Traceless Quadrupole moment (field-independent basis, Debye-Ang):

XX= 4.4110 YY= -20.6501 ZZ= 16.2390

XY= -8.0845 XZ= 7.9177 YZ= -0.0420

Octapole moment (field-independent basis, Debye-Ang<sup>2</sup>):

XXX= -62.9144 YYY= -56.5830 ZZZ= 1.2744 XYY= -26.9668

XXY= -19.8586 XXZ= 28.1493 XZZ= 4.6130 YZZ= -10.2582

YYZ= 13.8278 XYZ= 32.4051

Hexadecapole moment (field-independent basis, Debye-Ang<sup>3</sup>):

XXXX= -5928.7361 YYYY= -3083.8415 ZZZZ= -1597.0357 XXXY= -84.2735

XXXZ= 19.6974 YYYYX= 16.7010 YYYZ= -28.4957 ZZZX= 27.0566

ZZZY= -4.1803 XXYY= -1743.6489 XXZZ= -1290.7588 YYZZ= -708.4541

XXYZ= -62.6329 YYXZ= 41.8371 ZZXY= -12.7059  
N-N= 2.388661444752D+03 E-N=-7.410025255113D+03 KE= 1.125414848510D+03

Test job not archived.

1|1|UNPC-UNK|SP|RB3LYP|6-31G|C22H21N1O3|PCUSER|19-Jul-2011|0|# RB3LYP  
/6-31G SCRF=(PCM,SOLVENT=METHANOL) TEST|[No Title]|0,1|C,0,-0.2907,1  
.7476,2.432|C,0,-1.4188,1.2517,1.9003|C,0,0.3746,2.528,1.3329|C,0,0.82  
64,1.494,0.3017|C,0,-0.4637,1.2474,-0.4983|C,0,-1.5114,1.7877,0.5025|O  
,0,-0.8337,3.0821,0.7322|C,0,1.8357,1.8568,-0.7178|N,0,-0.3018,-0.0928  
, -1.0417|O,0,2.6461,2.7695,-0.6061|O,0,1.8108,1.05,-1.8123|C,0,-1.4955  
, -0.5742,-1.7609|C,0,-2.675,-0.8702,-0.8629|C,0,-2.5497,-1.7464,0.2253  
|C,0,-3.6456,-2.0261,1.0432|C,0,-4.8813,-1.4403,0.7775|C,0,-5.024,-0.5  
804,-0.3094|C,0,-3.9292,-0.3008,-1.1295|C,0,0.8822,-0.0875,-1.948|H,0,  
0.5269,0.0224,-2.9811|C,0,1.7021,-1.3991,-1.8896|C,0,2.4074,-1.6438,-0  
.5744|C,0,1.7711,-2.3504,0.4543|C,0,2.4083,-2.5432,1.6808|C,0,3.6892,-  
2.0364,1.8895|C,0,4.3363,-1.3401,0.8708|C,0,3.7004,-1.1458,-0.3562|H,0  
,0.1145,1.5435,3.411|H,0,-2.123,0.5807,2.3669|H,0,1.0683,3.3102,1.6419  
|H,0,1.2212,0.6109,0.8229|H,0,-0.5251,1.9435,-1.3546|H,0,-2.5161,1.973  
,0.1223|H,0,-1.7838,0.1448,-2.5395|H,0,-1.2642,-1.5145,-2.2788|H,0,-1.  
5921,-2.2111,0.4468|H,0,-3.5346,-2.7019,1.8878|H,0,-5.7351,-1.6587,1.4  
145|H,0,-5.9911,-0.1301,-0.5213|H,0,-4.0662,0.3676,-1.9776|H,0,1.0611,  
-2.2587,-2.1225|H,0,2.4638,-1.3734,-2.6805|H,0,0.7711,-2.7519,0.3093|H  
,0,1.9043,-3.0899,2.4744|H,0,4.1853,-2.1885,2.8452|H,0,5.3387,-0.9503,  
1.0318|H,0,4.2229,-0.6004,-1.1401||Version=x86-Win32-G03RevB.03|State=  
1-A|HF=-1131.0272549|RMSD=5.587e-006|Dipole=-1.7432509,-2.5325413,0.14  
16225|PG=C01 [X(C22H21N1O3)]|@

### INTERMEDIATE 10i\_a

%mem=256Mb

# RB3LYP/6-31G SCRF=(PCM,Solvent=Methanol) Test

1/38=1/1;  
2/17=6,18=5,40=1/2;  
3/5=1,6=6,11=2,16=1,25=1,30=1,70=2201,72=3,74=-5/1,2,3;  
4/7=1/1;  
5/5=2,32=1,38=5,53=3/2;  
6/7=2,8=2,9=2,10=2,28=1/1;  
99/5=1,9=1/99;

[No Title]

Symbolic Z-matrix:

Charge = 0 Multiplicity = 1

|   |   |         |         |         |
|---|---|---------|---------|---------|
| C | 0 | 2.9018  | 2.0773  | 0.5506  |
| C | 0 | 3.4062  | 0.8367  | 0.5079  |
| C | 0 | 1.809   | 2.0407  | 1.5762  |
| C | 0 | 0.6695  | 1.1911  | 0.9949  |
| C | 0 | 1.1795  | -0.2588 | 1.2118  |
| C | 0 | 2.6741  | 0.0354  | 1.5419  |
| O | 0 | 2.4304  | 1.115   | 2.5125  |
| C | 0 | -0.6471 | 1.3636  | 1.6968  |
| N | 0 | 0.6931  | -1.1678 | 0.1376  |
| O | 0 | -0.7835 | 1.9878  | 2.7455  |
| O | 0 | -1.7249 | 0.7776  | 1.0965  |
| C | 0 | 1.3952  | -2.4696 | 0.1877  |
| C | 0 | 2.7904  | -2.4361 | -0.3983 |
| C | 0 | 3.8666  | -3.0106 | 0.2941  |
| C | 0 | 5.1466  | -3.0132 | -0.2634 |
| C | 0 | 5.3616  | -2.4592 | -1.5241 |
| C | 0 | 4.2967  | -1.9068 | -2.2327 |
| C | 0 | 3.0169  | -1.8999 | -1.6762 |



|   |   |         |         |         |
|---|---|---------|---------|---------|
| C | 0 | -1.4818 | 0.0331  | -0.0108 |
| C | 0 | -0.806  | -1.3265 | 0.2876  |
| N | 0 | -1.787  | 0.426   | -1.2014 |
| C | 0 | -2.4966 | 1.7048  | -1.3389 |
| C | 0 | -1.5806 | 2.9019  | -1.2686 |
| C | 0 | -1.785  | 3.9041  | -0.3095 |
| C | 0 | -0.9078 | 4.9859  | -0.2199 |
| C | 0 | 0.1739  | 5.0827  | -1.0932 |
| C | 0 | 0.3758  | 4.103   | -2.0631 |
| C | 0 | -0.4992 | 3.02    | -2.1542 |
| H | 0 | -1.0207 | -1.5807 | 1.3355  |
| C | 0 | -1.4997 | -2.4107 | -0.5847 |
| C | 0 | -2.9859 | -2.5346 | -0.306  |
| C | 0 | -3.4412 | -3.0576 | 0.9133  |
| C | 0 | -4.8088 | -3.1492 | 1.1765  |
| C | 0 | -5.7335 | -2.7248 | 0.2245  |
| C | 0 | -5.2924 | -2.2134 | -0.9941 |
| C | 0 | -3.9256 | -2.1212 | -1.2602 |
| H | 0 | 3.1637  | 2.9126  | -0.0802 |
| H | 0 | 4.1742  | 0.4683  | -0.154  |
| H | 0 | 1.5701  | 2.9932  | 2.0513  |
| H | 0 | 0.5514  | 1.4623  | -0.0584 |
| H | 0 | 0.7659  | -0.639  | 2.1612  |
| H | 0 | 3.2388  | -0.76   | 2.0287  |
| H | 0 | 0.8908  | -3.2212 | -0.4247 |
| H | 0 | 1.4039  | -2.8595 | 1.2137  |
| H | 0 | 3.719   | -3.4628 | 1.273   |
| H | 0 | 5.9768  | -3.4547 | 0.2833  |
| H | 0 | 6.3587  | -2.465  | -1.9579 |
| H | 0 | 4.4623  | -1.4822 | -3.22   |
| H | 0 | 2.1932  | -1.469  | -2.2427 |
| H | 0 | -3.3068 | 1.7813  | -0.6021 |
| H | 0 | -2.9945 | 1.7135  | -2.3162 |
| H | 0 | -2.6262 | 3.8494  | 0.3795  |
| H | 0 | -1.0717 | 5.759   | 0.5278  |
| H | 0 | 0.854   | 5.9289  | -1.0255 |
| H | 0 | 1.215   | 4.1829  | -2.7505 |
| H | 0 | -0.3265 | 2.2569  | -2.9115 |
| H | 0 | -1.3264 | -2.2158 | -1.6506 |
| H | 0 | -1.0857 | -3.4047 | -0.3842 |
| H | 0 | -2.7381 | -3.4066 | 1.6673  |
| H | 0 | -5.1545 | -3.5567 | 2.124   |
| H | 0 | -6.7989 | -2.7983 | 0.4301  |
| H | 0 | -6.0144 | -1.8874 | -1.7393 |
| H | 0 | -3.6004 | -1.7173 | -2.2175 |

Stoichiometry C<sub>30</sub>H<sub>28</sub>N<sub>2</sub>O<sub>3</sub>

Framework group C1[X(C<sub>30</sub>H<sub>28</sub>N<sub>2</sub>O<sub>3</sub>)]

Deg. of freedom 183

Full point group C1 NOp 1

Largest Abelian subgroup C1 NOp 1

Largest concise Abelian subgroup C1 NOp 1

Standard orientation:

| Center<br>Number | Atomic<br>Number | Atomic<br>Type | Coordinates (Angstroms) |           |          |
|------------------|------------------|----------------|-------------------------|-----------|----------|
|                  |                  |                | X                       | Y         | Z        |
| 1                | 6                | 0              | 2.900173                | 2.079393  | 0.593873 |
| 2                | 6                | 0              | 3.401848                | 0.838093  | 0.540705 |
| 3                | 6                | 0              | 1.804788                | 2.035650  | 1.616430 |
| 4                | 6                | 0              | 0.664780                | 1.194188  | 1.024388 |
| 5                | 6                | 0              | 1.170943                | -0.258861 | 1.228849 |

|    |   |   |           |           |           |
|----|---|---|-----------|-----------|-----------|
| 6  | 6 | 0 | 2.665398  | 0.028776  | 1.565329  |
| 7  | 8 | 0 | 2.421785  | 1.099744  | 2.545468  |
| 8  | 6 | 0 | -0.653136 | 1.363098  | 1.724689  |
| 9  | 7 | 0 | 0.685102  | -1.156581 | 0.144954  |
| 10 | 8 | 0 | -0.790678 | 1.977705  | 2.778892  |
| 11 | 8 | 0 | -1.730797 | 0.785261  | 1.116282  |
| 12 | 6 | 0 | 1.384109  | -2.460407 | 0.184484  |
| 13 | 6 | 0 | 2.780811  | -2.424600 | -0.397790 |
| 14 | 6 | 0 | 3.854002  | -3.008072 | 0.291771  |
| 15 | 6 | 0 | 5.135353  | -3.008367 | -0.262624 |
| 16 | 6 | 0 | 5.354697  | -2.443013 | -1.517522 |
| 17 | 6 | 0 | 4.292795  | -1.881513 | -2.223464 |
| 18 | 6 | 0 | 3.011656  | -1.876910 | -1.670027 |
| 19 | 6 | 0 | -1.486687 | 0.050666  | 0.002607  |
| 20 | 6 | 0 | -0.814719 | -1.313236 | 0.289817  |
| 21 | 7 | 0 | -1.788078 | 0.455465  | -1.184974 |
| 22 | 6 | 0 | -2.494424 | 1.737133  | -1.312135 |
| 23 | 6 | 0 | -1.575874 | 2.931406  | -1.228335 |
| 24 | 6 | 0 | -1.780335 | 3.924995  | -0.260330 |
| 25 | 6 | 0 | -0.900894 | 5.003882  | -0.158412 |
| 26 | 6 | 0 | 0.183157  | 5.106414  | -1.028137 |
| 27 | 6 | 0 | 0.385195  | 4.135431  | -2.006735 |
| 28 | 6 | 0 | -0.492045 | 3.055354  | -2.110159 |
| 29 | 1 | 0 | -1.032559 | -1.576800 | 1.334751  |
| 30 | 6 | 0 | -1.508752 | -2.387572 | -0.594342 |
| 31 | 6 | 0 | -2.995907 | -2.510671 | -0.320425 |
| 32 | 6 | 0 | -3.455378 | -3.044083 | 0.892784  |
| 33 | 6 | 0 | -4.823823 | -3.135011 | 1.151793  |
| 34 | 6 | 0 | -5.745223 | -2.699535 | 0.201597  |
| 35 | 6 | 0 | -5.299980 | -2.177696 | -1.011057 |
| 36 | 6 | 0 | -3.932326 | -2.086140 | -1.272962 |
| 37 | 1 | 0 | 3.165518  | 2.919993  | -0.028390 |
| 38 | 1 | 0 | 4.170623  | 0.474177  | -0.122774 |
| 39 | 1 | 0 | 1.566897  | 2.984180  | 2.099906  |
| 40 | 1 | 0 | 0.549875  | 1.475568  | -0.026592 |
| 41 | 1 | 0 | 0.754157  | -0.647034 | 2.173618  |
| 42 | 1 | 0 | 3.227092  | -0.772472 | 2.045979  |
| 43 | 1 | 0 | 0.879497  | -3.205043 | -0.436193 |
| 44 | 1 | 0 | 1.389411  | -2.859973 | 1.206782  |
| 45 | 1 | 0 | 3.702979  | -3.469132 | 1.266005  |
| 46 | 1 | 0 | 5.963205  | -3.456906 | 0.281901  |
| 47 | 1 | 0 | 6.352839  | -2.447021 | -1.948939 |
| 48 | 1 | 0 | 4.461776  | -1.448015 | -3.206314 |
| 49 | 1 | 0 | 2.190328  | -1.438798 | -2.234436 |
| 50 | 1 | 0 | -3.306247 | 1.808554  | -0.576613 |
| 51 | 1 | 0 | -2.989912 | 1.756184  | -2.290513 |
| 52 | 1 | 0 | -2.623340 | 3.865744  | 0.426082  |
| 53 | 1 | 0 | -1.064860 | 5.770280  | 0.596141  |
| 54 | 1 | 0 | 0.865015  | 5.950371  | -0.950816 |
| 55 | 1 | 0 | 1.226254  | 4.219870  | -2.691315 |
| 56 | 1 | 0 | -0.319232 | 2.299025  | -2.874196 |
| 57 | 1 | 0 | -1.332402 | -2.183040 | -1.657934 |
| 58 | 1 | 0 | -1.097509 | -3.384367 | -0.402216 |
| 59 | 1 | 0 | -2.754922 | -3.401787 | 1.645163  |
| 60 | 1 | 0 | -5.172767 | -3.550621 | 2.094570  |
| 61 | 1 | 0 | -6.811287 | -2.772516 | 0.403911  |
| 62 | 1 | 0 | -6.019410 | -1.843031 | -1.754899 |
| 63 | 1 | 0 | -3.603867 | -1.673990 | -2.225622 |

Rotational constants (GHZ): 0.1367900 0.1076370 0.0749521

Standard basis: 6-31G (6D, 7F)

There are 371 symmetry adapted basis functions of A symmetry.

Integral buffers will be 262144 words long.

Raffenetti 2 integral format.

Two-electron integral symmetry is turned on.

371 basis functions, 882 primitive gaussians, 371 cartesian basis functions

123 alpha electrons 123 beta electrons

nuclear repulsion energy 3750.6237191624 Hartrees.

NAtoms= 63 NActive= 63 NUniq= 63 SFac= 1.00D+00 NAtFMM= 60 Big=T

-----  
United Atom Topological Model (UA0 parameters set).

| Nord | Group | Hybr | Charge | Alpha | Radius                  | Bonded to |  |
|------|-------|------|--------|-------|-------------------------|-----------|--|
| 1    | CH *  | 0.00 | 1.00   | 2.125 | C2 [d] C3 [s]           |           |  |
| 2    | CH *  | 0.00 | 1.00   | 2.125 | C1 [d] C6 [s]           |           |  |
| 3    | CH *  | 0.00 | 1.00   | 2.125 | C1 [s] C4 [s] O7 [s]    |           |  |
| 4    | CH *  | 0.00 | 1.00   | 2.125 | C3 [s] C5 [s] C8 [s]    |           |  |
| 5    | CH *  | 0.00 | 1.00   | 2.125 | C4 [s] C6 [s] N9 [s]    |           |  |
| 6    | CH *  | 0.00 | 1.00   | 2.125 | C2 [s] C5 [s] O7 [s]    |           |  |
| 7    | O *   | 0.00 | 1.00   | 1.750 | C3 [s] C6 [s]           |           |  |
| 8    | C *   | 0.00 | 1.00   | 1.925 | C4 [s] O10 [d] O11 [s]  |           |  |
| 9    | N *   | 0.00 | 1.00   | 1.830 | C5 [s] C12 [s] C20 [s]  |           |  |
| 10   | O *   | 0.00 | 1.00   | 1.750 | C8 [d]                  |           |  |
| 11   | O *   | 0.00 | 1.00   | 1.750 | C8 [s] C19 [s]          |           |  |
| 12   | CH2 * | 0.00 | 1.00   | 2.325 | N9 [s] C13 [s]          |           |  |
| 13   | C *   | 0.00 | 1.00   | 1.925 | C12 [s] C14 [s] C18 [s] |           |  |
| 14   | CH *  | 0.00 | 1.00   | 2.125 | C13 [s] C15 [s]         |           |  |
| 15   | CH *  | 0.00 | 1.00   | 2.125 | C14 [s] C16 [s]         |           |  |
| 16   | CH *  | 0.00 | 1.00   | 2.125 | C15 [s] C17 [s]         |           |  |
| 17   | CH *  | 0.00 | 1.00   | 2.125 | C16 [s] C18 [s]         |           |  |
| 18   | CH *  | 0.00 | 1.00   | 2.125 | C13 [s] C17 [s]         |           |  |
| 19   | C *   | 0.00 | 1.00   | 1.925 | O11 [s] C20 [s] N21 [d] |           |  |
| 20   | CH *  | 0.00 | 1.00   | 2.125 | N9 [s] C19 [s] C30 [s]  |           |  |
| 21   | N *   | 0.00 | 1.00   | 1.830 | C19 [d] C22 [s]         |           |  |
| 22   | CH2 * | 0.00 | 1.00   | 2.325 | N21 [s] C23 [s]         |           |  |
| 23   | C *   | 0.00 | 1.00   | 1.925 | C22 [s] C24 [s] C28 [s] |           |  |
| 24   | CH *  | 0.00 | 1.00   | 2.125 | C23 [s] C25 [s]         |           |  |
| 25   | CH *  | 0.00 | 1.00   | 2.125 | C24 [s] C26 [s]         |           |  |
| 26   | CH *  | 0.00 | 1.00   | 2.125 | C25 [s] C27 [s]         |           |  |
| 27   | CH *  | 0.00 | 1.00   | 2.125 | C26 [s] C28 [s]         |           |  |
| 28   | CH *  | 0.00 | 1.00   | 2.125 | C23 [s] C27 [s]         |           |  |
| 30   | CH2 * | 0.00 | 1.00   | 2.325 | C20 [s] C31 [s]         |           |  |
| 31   | C *   | 0.00 | 1.00   | 1.925 | C30 [s] C32 [s] C36 [s] |           |  |
| 32   | CH *  | 0.00 | 1.00   | 2.125 | C31 [s] C33 [s]         |           |  |
| 33   | CH *  | 0.00 | 1.00   | 2.125 | C32 [s] C34 [s]         |           |  |
| 34   | CH *  | 0.00 | 1.00   | 2.125 | C33 [s] C35 [s]         |           |  |
| 35   | CH *  | 0.00 | 1.00   | 2.125 | C34 [s] C36 [s]         |           |  |
| 36   | CH *  | 0.00 | 1.00   | 2.125 | C31 [s] C35 [s]         |           |  |

-----  
Polarizable Continuum Model (PCM)

=====  
Model : PCM.

Atomic radii : UA0 (Simple United Atom Topological Model).

Polarization charges : Total charges.

Charge compensation : None.

Solution method : Matrix inversion.

Cavity : GePol (RMin=0.200 OFac=0.890).

Default sphere list used, NSphG= 35.

Tesserae with average area of 0.200 Ang\*\*2.

Solvent : Methanol, Eps= 32.630000.

-----  
One-electron integrals computed using PRISM.

NBasis= 371 RedAO= T NBF= 371

NBsUse= 371 1.00D-06 NBFU= 371

Harris functional with IExCor= 402 diagonalized for initial guess.



| Sphere | on Atom | Surface | Charge | GEI   | GCav | GDR   |
|--------|---------|---------|--------|-------|------|-------|
| 1      | C1      | 12.23   | -0.027 | -0.55 | 1.69 | -1.13 |
| 2      | C2      | 8.28    | -0.001 | -0.17 | 1.38 | -0.75 |
| 3      | C3      | 6.20    | -0.039 | -0.16 | 1.05 | -0.63 |
| 4      | C4      | 0.00    | 0.000  | 0.00  | 0.30 | 0.00  |
| 5      | C5      | 3.29    | -0.035 | -0.33 | 0.48 | -0.40 |
| 6      | C6      | 6.73    | -0.030 | -0.28 | 0.81 | -0.69 |
| 7      | O7      | 8.47    | 0.128  | -2.94 | 0.97 | -0.97 |
| 8      | C8      | 0.91    | -0.004 | 0.02  | 0.25 | -0.05 |
| 9      | N9      | 0.00    | 0.000  | 0.00  | 0.22 | 0.00  |
| 10     | O10     | 14.05   | 0.158  | -3.66 | 1.86 | -1.51 |
| 11     | O11     | 4.46    | 0.042  | -0.67 | 0.76 | -0.41 |
| 12     | C12     | 12.72   | -0.043 | -0.44 | 1.55 | -1.26 |
| 13     | C13     | 0.20    | 0.001  | 0.00  | 0.04 | 0.00  |
| 14     | C14     | 12.60   | -0.023 | -0.56 | 1.39 | -1.15 |
| 15     | C15     | 17.21   | -0.018 | -0.51 | 1.69 | -1.53 |
| 16     | C16     | 16.57   | -0.016 | -0.49 | 1.69 | -1.50 |
| 17     | C17     | 16.59   | -0.020 | -0.50 | 1.65 | -1.47 |
| 18     | C18     | 9.54    | -0.011 | -0.25 | 1.31 | -0.82 |
| 19     | C19     | 0.00    | 0.000  | 0.00  | 0.13 | 0.00  |
| 20     | C20     | 1.61    | -0.024 | -0.33 | 0.45 | -0.17 |
| 21     | N21     | 1.63    | 0.032  | -0.52 | 0.52 | -0.16 |
| 22     | C22     | 19.20   | -0.051 | -0.28 | 2.16 | -1.63 |
| 23     | C23     | 0.05    | 0.000  | 0.00  | 0.05 | 0.00  |
| 24     | C24     | 12.03   | -0.028 | -0.34 | 1.32 | -1.00 |
| 25     | C25     | 16.43   | -0.027 | -0.45 | 1.69 | -1.40 |
| 26     | C26     | 15.39   | -0.027 | -0.53 | 1.69 | -1.36 |
| 27     | C27     | 13.89   | -0.031 | -0.56 | 1.64 | -1.28 |
| 28     | C28     | 10.58   | -0.030 | -0.40 | 1.41 | -1.00 |
| 29     | C30     | 14.41   | -0.036 | -0.23 | 1.63 | -1.19 |
| 30     | C31     | 0.22    | 0.001  | 0.00  | 0.08 | 0.00  |
| 31     | C32     | 12.96   | -0.021 | -0.56 | 1.55 | -1.21 |
| 32     | C33     | 17.13   | -0.015 | -0.51 | 1.69 | -1.58 |
| 33     | C34     | 17.45   | -0.011 | -0.51 | 1.69 | -1.56 |
| 34     | C35     | 16.34   | -0.018 | -0.48 | 1.69 | -1.44 |
| 35     | C36     | 10.39   | -0.013 | -0.30 | 1.36 | -0.88 |

Added spheres: 106.63 0.206 -3.63 0.00 0.00

-----

\*\*\*\*\*

Population analysis using the SCF density.

\*\*\*\*\*

Orbital symmetries:

Occupied (A)  
(A) (A) (A) (A) (A) (A) (A) (A) (A) (A) (A) (A) (A)  
(A) (A) (A) (A) (A) (A) (A) (A) (A) (A) (A) (A) (A)  
(A) (A) (A) (A) (A) (A) (A) (A) (A) (A) (A) (A) (A)  
(A) (A) (A) (A) (A) (A) (A) (A) (A) (A) (A) (A) (A)  
(A) (A) (A) (A) (A) (A) (A) (A) (A) (A) (A) (A) (A)  
(A) (A) (A) (A) (A) (A) (A) (A) (A) (A) (A) (A) (A)  
(A) (A) (A) (A) (A) (A) (A) (A) (A) (A) (A) (A) (A)  
(A) (A) (A) (A) (A) (A) (A) (A) (A) (A) (A) (A) (A)  
(A) (A) (A)  
Virtual (A)  
(A) (A) (A) (A) (A) (A) (A) (A) (A) (A) (A) (A) (A)  
(A) (A) (A) (A) (A) (A) (A) (A) (A) (A) (A) (A) (A)  
(A) (A) (A) (A) (A) (A) (A) (A) (A) (A) (A) (A) (A)

(A) (A) (A) (A) (A) (A) (A) (A) (A) (A) (A) (A) (A)  
(A) (A) (A) (A) (A) (A) (A) (A) (A) (A) (A) (A) (A)  
(A) (A) (A) (A) (A) (A) (A) (A) (A) (A) (A) (A) (A)  
(A) (A) (A) (A) (A) (A) (A) (A) (A) (A) (A) (A) (A)  
(A) (A) (A) (A) (A) (A) (A) (A) (A) (A) (A) (A) (A)  
(A) (A) (A) (A) (A) (A) (A) (A) (A) (A) (A) (A) (A)  
(A) (A) (A) (A) (A) (A) (A) (A) (A) (A) (A) (A) (A)  
(A) (A) (A) (A) (A) (A) (A) (A) (A) (A) (A) (A) (A)  
(A) (A) (A) (A) (A) (A) (A) (A) (A) (A) (A) (A) (A)  
(A) (A) (A) (A) (A) (A) (A) (A) (A) (A) (A) (A) (A)  
(A) (A) (A) (A) (A) (A) (A) (A) (A) (A) (A) (A) (A)  
(A) (A) (A) (A) (A) (A) (A) (A) (A) (A) (A) (A) (A)  
(A) (A) (A) (A) (A) (A) (A) (A) (A) (A) (A) (A) (A)  
(A) (A) (A) (A) (A) (A) (A) (A) (A) (A) (A) (A) (A)  
(A) (A) (A) (A) (A) (A) (A) (A) (A) (A) (A) (A) (A)  
(A) (A) (A) (A) (A) (A) (A) (A) (A) (A) (A) (A) (A)  
(A) (A) (A) (A) (A) (A) (A) (A) (A) (A) (A) (A) (A)

The electronic state is 1-A.

|                            |           |           |           |           |           |
|----------------------------|-----------|-----------|-----------|-----------|-----------|
| Alpha occ. eigenvalues --  | -19.22423 | -19.16358 | -19.15058 | -14.34921 | -14.34535 |
| Alpha occ. eigenvalues --  | -10.35099 | -10.30340 | -10.24860 | -10.24549 | -10.24030 |
| Alpha occ. eigenvalues --  | -10.23963 | -10.21669 | -10.21539 | -10.21166 | -10.20040 |
| Alpha occ. eigenvalues --  | -10.19444 | -10.19412 | -10.19006 | -10.18701 | -10.18686 |
| Alpha occ. eigenvalues --  | -10.18677 | -10.18632 | -10.18592 | -10.18572 | -10.18477 |
| Alpha occ. eigenvalues --  | -10.18313 | -10.18267 | -10.18257 | -10.18212 | -10.18168 |
| Alpha occ. eigenvalues --  | -10.18126 | -10.18105 | -10.18092 | -10.18029 | -10.18001 |
| Alpha occ. eigenvalues --  | -1.16258  | -1.07300  | -1.06650  | -0.94721  | -0.93547  |
| Alpha occ. eigenvalues --  | -0.86270  | -0.85917  | -0.85730  | -0.82559  | -0.80015  |
| Alpha occ. eigenvalues --  | -0.78975  | -0.77495  | -0.76762  | -0.75627  | -0.74894  |
| Alpha occ. eigenvalues --  | -0.74465  | -0.74390  | -0.73041  | -0.70603  | -0.68486  |
| Alpha occ. eigenvalues --  | -0.67620  | -0.65186  | -0.61545  | -0.60875  | -0.60412  |
| Alpha occ. eigenvalues --  | -0.60299  | -0.59958  | -0.59258  | -0.58105  | -0.57531  |
| Alpha occ. eigenvalues --  | -0.55963  | -0.55336  | -0.53574  | -0.52091  | -0.51280  |
| Alpha occ. eigenvalues --  | -0.50978  | -0.50835  | -0.50193  | -0.49594  | -0.48957  |
| Alpha occ. eigenvalues --  | -0.47566  | -0.46633  | -0.46038  | -0.45951  | -0.45400  |
| Alpha occ. eigenvalues --  | -0.45157  | -0.44793  | -0.44625  | -0.43863  | -0.43198  |
| Alpha occ. eigenvalues --  | -0.42410  | -0.42242  | -0.41901  | -0.41790  | -0.41520  |
| Alpha occ. eigenvalues --  | -0.41179  | -0.40632  | -0.40596  | -0.40364  | -0.40009  |
| Alpha occ. eigenvalues --  | -0.38967  | -0.38241  | -0.37341  | -0.36677  | -0.36309  |
| Alpha occ. eigenvalues --  | -0.35894  | -0.35583  | -0.35192  | -0.34959  | -0.34316  |
| Alpha occ. eigenvalues --  | -0.34253  | -0.33940  | -0.33742  | -0.33575  | -0.33200  |
| Alpha occ. eigenvalues --  | -0.32488  | -0.31214  | -0.28564  | -0.27928  | -0.26890  |
| Alpha occ. eigenvalues --  | -0.25457  | -0.25164  | -0.25012  | -0.24861  | -0.24788  |
| Alpha occ. eigenvalues --  | -0.24371  | -0.24059  | -0.22405  |           |           |
| Alpha virt. eigenvalues -- | -0.03938  | -0.02035  | -0.00508  | -0.00283  | -0.00131  |
| Alpha virt. eigenvalues -- | 0.00108   | 0.00231   | 0.00561   | 0.00699   | 0.08360   |
| Alpha virt. eigenvalues -- | 0.09182   | 0.10074   | 0.10350   | 0.10517   | 0.11289   |
| Alpha virt. eigenvalues -- | 0.12230   | 0.12782   | 0.13181   | 0.13302   | 0.13491   |
| Alpha virt. eigenvalues -- | 0.13724   | 0.14216   | 0.14499   | 0.15032   | 0.15660   |
| Alpha virt. eigenvalues -- | 0.15769   | 0.15954   | 0.16559   | 0.16712   | 0.16845   |
| Alpha virt. eigenvalues -- | 0.17345   | 0.17429   | 0.17698   | 0.17866   | 0.18174   |
| Alpha virt. eigenvalues -- | 0.18867   | 0.18929   | 0.19273   | 0.19941   | 0.20059   |
| Alpha virt. eigenvalues -- | 0.20433   | 0.20820   | 0.20961   | 0.21424   | 0.21763   |
| Alpha virt. eigenvalues -- | 0.22326   | 0.22634   | 0.23969   | 0.24464   | 0.25322   |
| Alpha virt. eigenvalues -- | 0.26032   | 0.26213   | 0.26578   | 0.27455   | 0.28256   |
| Alpha virt. eigenvalues -- | 0.29404   | 0.30923   | 0.31318   | 0.31562   | 0.31628   |
| Alpha virt. eigenvalues -- | 0.32425   | 0.32517   | 0.33526   | 0.33570   | 0.33804   |
| Alpha virt. eigenvalues -- | 0.34757   | 0.35170   | 0.35226   | 0.35870   | 0.36176   |
| Alpha virt. eigenvalues -- | 0.36344   | 0.37485   | 0.42174   | 0.43061   | 0.46395   |
| Alpha virt. eigenvalues -- | 0.48340   | 0.48791   | 0.49301   | 0.49732   | 0.50043   |
| Alpha virt. eigenvalues -- | 0.51647   | 0.52019   | 0.52764   | 0.53547   | 0.53767   |
| Alpha virt. eigenvalues -- | 0.54747   | 0.55139   | 0.55582   | 0.56020   | 0.56085   |
| Alpha virt. eigenvalues -- | 0.56482   | 0.56824   | 0.57031   | 0.57307   | 0.57999   |
| Alpha virt. eigenvalues -- | 0.58512   | 0.59184   | 0.59397   | 0.59674   | 0.60054   |

|                            |         |         |         |         |         |
|----------------------------|---------|---------|---------|---------|---------|
| Alpha virt. eigenvalues -- | 0.60695 | 0.61182 | 0.61795 | 0.62143 | 0.62258 |
| Alpha virt. eigenvalues -- | 0.62415 | 0.62671 | 0.63000 | 0.63385 | 0.63501 |
| Alpha virt. eigenvalues -- | 0.63811 | 0.64142 | 0.64564 | 0.64724 | 0.65024 |
| Alpha virt. eigenvalues -- | 0.65232 | 0.65415 | 0.65592 | 0.65756 | 0.65883 |
| Alpha virt. eigenvalues -- | 0.66186 | 0.66522 | 0.66746 | 0.67103 | 0.67543 |
| Alpha virt. eigenvalues -- | 0.67800 | 0.68938 | 0.69330 | 0.70058 | 0.70477 |
| Alpha virt. eigenvalues -- | 0.70686 | 0.71617 | 0.71865 | 0.73128 | 0.73501 |
| Alpha virt. eigenvalues -- | 0.75207 | 0.75772 | 0.76652 | 0.77490 | 0.79188 |
| Alpha virt. eigenvalues -- | 0.80352 | 0.81650 | 0.82548 | 0.82881 | 0.83562 |
| Alpha virt. eigenvalues -- | 0.83951 | 0.84139 | 0.84747 | 0.85203 | 0.85623 |
| Alpha virt. eigenvalues -- | 0.85981 | 0.86425 | 0.86527 | 0.86932 | 0.87039 |
| Alpha virt. eigenvalues -- | 0.87517 | 0.87994 | 0.88251 | 0.88453 | 0.88854 |
| Alpha virt. eigenvalues -- | 0.89986 | 0.90225 | 0.90558 | 0.90730 | 0.91630 |
| Alpha virt. eigenvalues -- | 0.92393 | 0.92552 | 0.93416 | 0.93852 | 0.94466 |
| Alpha virt. eigenvalues -- | 0.94845 | 0.95428 | 0.96602 | 0.96919 | 0.97425 |
| Alpha virt. eigenvalues -- | 0.97684 | 0.98311 | 0.98782 | 0.99272 | 0.99613 |
| Alpha virt. eigenvalues -- | 1.00271 | 1.01170 | 1.01876 | 1.02684 | 1.02906 |
| Alpha virt. eigenvalues -- | 1.04080 | 1.04832 | 1.05115 | 1.05868 | 1.06209 |
| Alpha virt. eigenvalues -- | 1.07520 | 1.08619 | 1.09253 | 1.09989 | 1.11150 |
| Alpha virt. eigenvalues -- | 1.11869 | 1.13224 | 1.14172 | 1.15194 | 1.15663 |
| Alpha virt. eigenvalues -- | 1.16631 | 1.17743 | 1.18421 | 1.19280 | 1.19994 |
| Alpha virt. eigenvalues -- | 1.20614 | 1.21907 | 1.22035 | 1.22427 | 1.23708 |
| Alpha virt. eigenvalues -- | 1.23761 | 1.25422 | 1.27251 | 1.28717 | 1.29893 |
| Alpha virt. eigenvalues -- | 1.31718 | 1.34036 | 1.35858 | 1.37972 | 1.39356 |
| Alpha virt. eigenvalues -- | 1.40804 | 1.42158 | 1.45408 | 1.46517 | 1.46912 |
| Alpha virt. eigenvalues -- | 1.47613 | 1.49103 | 1.49435 | 1.51171 | 1.51297 |
| Alpha virt. eigenvalues -- | 1.55242 | 1.56429 | 1.57402 | 1.66790 | 1.70328 |
| Alpha virt. eigenvalues -- | 1.73114 | 1.78968 | 1.82394 | 1.84081 | 1.90431 |
| Alpha virt. eigenvalues -- | 1.91407 | 1.91825 | 1.94372 | 1.96879 | 2.02879 |
| Alpha virt. eigenvalues -- | 2.10080 | 2.15631 | 2.56318 |         |         |

Condensed to atoms (all electrons):

Mulliken atomic charges:

|    |             |
|----|-------------|
| 1  |             |
| 1  | C -0.070931 |
| 2  | C -0.057668 |
| 3  | C -0.065787 |
| 4  | C -0.202573 |
| 5  | C 0.064365  |
| 6  | C -0.097484 |
| 7  | O -0.484103 |
| 8  | C 0.550594  |
| 9  | N -0.447443 |
| 10 | O -0.446084 |
| 11 | O -0.501164 |
| 12 | C -0.217597 |
| 13 | C 0.087683  |
| 14 | C -0.182228 |
| 15 | C -0.152844 |
| 16 | C -0.147473 |
| 17 | C -0.156642 |
| 18 | C -0.145120 |
| 19 | C 0.387048  |
| 20 | C 0.014108  |
| 21 | N -0.336341 |
| 22 | C -0.264270 |
| 23 | C 0.068661  |
| 24 | C -0.171087 |
| 25 | C -0.149984 |
| 26 | C -0.146307 |
| 27 | C -0.149898 |
| 28 | C -0.159707 |
| 29 | H 0.166168  |

30 C -0.343309  
31 C 0.073014  
32 C -0.168676  
33 C -0.156473  
34 C -0.147522  
35 C -0.156065  
36 C -0.158737  
37 H 0.180709  
38 H 0.173659  
39 H 0.184563  
40 H 0.221858  
41 H 0.179931  
42 H 0.186703  
43 H 0.184054  
44 H 0.140697  
45 H 0.156837  
46 H 0.153683  
47 H 0.151941  
48 H 0.153897  
49 H 0.152624  
50 H 0.176535  
51 H 0.175842  
52 H 0.163575  
53 H 0.158985  
54 H 0.156682  
55 H 0.159081  
56 H 0.161979  
57 H 0.165153  
58 H 0.167011  
59 H 0.156742  
60 H 0.153069  
61 H 0.150803  
62 H 0.151740  
63 H 0.153525

Sum of Mulliken charges= 0.00000

Atomic charges with hydrogens summed into heavy atoms:

1  
1 C 0.109778  
2 C 0.115990  
3 C 0.118776  
4 C 0.019285  
5 C 0.244295  
6 C 0.089219  
7 O -0.484103  
8 C 0.550594  
9 N -0.447443  
10 O -0.446084  
11 O -0.501164  
12 C 0.107154  
13 C 0.087683  
14 C -0.025391  
15 C 0.000840  
16 C 0.004468  
17 C -0.002745  
18 C 0.007504  
19 C 0.387048  
20 C 0.180275  
21 N -0.336341  
22 C 0.088106  
23 C 0.068661  
24 C -0.007512  
25 C 0.009001



26 C 0.010375  
27 C 0.009183  
28 C 0.002272  
29 H 0.000000  
30 C -0.011145  
31 C 0.073014  
32 C -0.011934  
33 C -0.003404  
34 C 0.003282  
35 C -0.004325  
36 C -0.005212  
37 H 0.000000  
38 H 0.000000  
39 H 0.000000  
40 H 0.000000  
41 H 0.000000  
42 H 0.000000  
43 H 0.000000  
44 H 0.000000  
45 H 0.000000  
46 H 0.000000  
47 H 0.000000  
48 H 0.000000  
49 H 0.000000  
50 H 0.000000  
51 H 0.000000  
52 H 0.000000  
53 H 0.000000  
54 H 0.000000  
55 H 0.000000  
56 H 0.000000  
57 H 0.000000  
58 H 0.000000  
59 H 0.000000  
60 H 0.000000  
61 H 0.000000  
62 H 0.000000  
63 H 0.000000

Sum of Mulliken charges= 0.00000

Electronic spatial extent (au):  $\langle R^2 \rangle = 15089.8614$

Charge= 0.0000 electrons

Dipole moment (field-independent basis, Debye):

X= 1.6326 Y= -2.3102 Z= -4.3040 Tot= 5.1504

Quadrupole moment (field-independent basis, Debye-Ang):

XX= -186.6692 YY= -187.7895 ZZ= -215.4386

XY= -0.4666 XZ= -5.2538 YZ= -18.5528

Traceless Quadrupole moment (field-independent basis, Debye-Ang):

XX= 9.9632 YY= 8.8429 ZZ= -18.8061

XY= -0.4666 XZ= -5.2538 YZ= -18.5528

Octapole moment (field-independent basis, Debye-Ang<sup>2</sup>):

XXX= -3.3042 YYY= 83.7016 ZZZ= -62.3982 XYY= 37.4154

XXY= -33.6371 XXZ= -32.6238 XZZ= -2.6736 YZZ= -44.9174

YYZ= 34.0860 XYZ= -12.2820

Hexadecapole moment (field-independent basis, Debye-Ang<sup>3</sup>):

XXXX= -9493.1145 YYYY= -7614.6004 ZZZZ= -2462.4132 XXXY= -132.8071

XXXZ= -126.8388 YYYX= 76.1499 YYYZ= -22.8130 ZZZX= -81.0566

ZZZY= -125.4806 XXYY= -2992.2134 XXZZ= -2078.9747 YYZZ= -1745.9342

XXYZ= -139.3156 YYXZ= -66.1775 ZZXY= 31.8819

N-N= 3.750623719162D+03 E-N=-1.097854888543D+04 KE= 1.487127366362D+03

Test job not archived.

1|1|UNPC-UNK|SP|RB3LYP|6-31G|C30H28N2O3|PCUSER|18-Jul-2011|0|# RB3LYP

```
/6-31G SCRF=(PCM,SOLVENT=METHANOL) TEST|[No Title]|0,1|C,0,2.9018,2.0773,0.5506|C,0,3.4062,0.8367,0.5079|C,0,1.809,2.0407,1.5762|C,0,0.6695,1.1911,0.9949|C,0,1.1795,-0.2588,1.2118|C,0,2.6741,0.0354,1.5419|O,0,2.4304,1.115,2.5125|C,0,-0.6471,1.3636,1.6968|N,0,0.6931,-1.1678,0.1376|O,0,-0.7835,1.9878,2.7455|O,0,-1.7249,0.7776,1.0965|C,0,1.3952,-2.4696,0.1877|C,0,2.7904,-2.4361,-0.3983|C,0,3.8666,-3.0106,0.2941|C,0,5.1466,-3.0132,-0.2634|C,0,5.3616,-2.4592,-1.5241|C,0,4.2967,-1.9068,-2.2327|C,0,3.0169,-1.8999,-1.6762|C,0,-1.4818,0.0331,-0.0108|C,0,-0.806,-1.3265,0.2876|N,0,-1.787,0.426,-1.2014|C,0,-2.4966,1.7048,-1.3389|C,0,-1.5806,2.9019,-1.2686|C,0,-1.785,3.9041,-0.3095|C,0,-0.9078,4.9859,-0.2199|C,0,0.1739,5.0827,-1.0932|C,0,0.3758,4.103,-2.0631|C,0,-0.4992,3.02,-2.1542|H,0,-1.0207,-1.5807,1.3355|C,0,-1.4997,-2.4107,-0.5847|C,0,-2.9859,-2.5346,-0.306|C,0,-3.4412,-3.0576,0.9133|C,0,-4.8088,-3.1492,1.1765|C,0,-5.7335,-2.7248,0.2245|C,0,-5.2924,-2.2134,-0.9941|C,0,-3.9256,-2.1212,-1.2602|H,0,3.1637,2.9126,-0.0802|H,0,4.1742,0.4683,-0.154|H,0,1.5701,2.9932,2.0513|H,0,0.5514,1.4623,-0.0584|H,0,0.7659,-0.639,2.1612|H,0,3.2388,-0.76,2.0287|H,0,0.8908,-3.2212,-0.4247|H,0,1.4039,-2.8595,1.2137|H,0,3.719,-3.4628,1.273|H,0,5.9768,-3.4547,0.2833|H,0,6.3587,-2.465,-1.9579|H,0,4.4623,-1.4822,-3.22|H,0,2.1932,-1.469,-2.2427|H,0,-3.3068,1.7813,-0.6021|H,0,-2.9945,1.7135,-2.3162|H,0,-2.6262,3.8494,0.3795|H,0,-1.0717,5.759,0.5278|H,0,0.854,5.9289,-1.0255|H,0,1.215,4.1829,-2.7505|H,0,-0.3265,2.2569,-2.9115|H,0,-1.3264,-2.2158,-1.6506|H,0,-1.0857,-3.4047,-0.3842|H,0,-2.7381,-3.4066,1.6673|H,0,-5.1545,-3.5567,2.124|H,0,-6.7989,-2.7983,0.4301|H,0,-6.0144,-1.8874,-1.7393|H,0,-3.6004,-1.7173,-2.2175||Version=x86-Win32-G03RevB.03|State=1-A|HF=-1494.7374277|RMSD=2.134e-006|Dipole=0.640313,-0.9233664,-1.6862383|PG=C01 [X(C30H28N2O3)]|@
```

#### INTERMEDIATE 10i\_b

%mem=256MB

```
# RB3LYP/6-31G SCRF=(PCM,Solvent=Methanol) Test
```

```
1/38=1/1;  
2/17=6,18=5,40=1/2;  
3/5=1,6=6,11=2,16=1,25=1,30=1,70=2201,72=3,74=-5/1,2,3;  
4/7=1/1;  
5/5=2,32=1,38=5,53=3/2;  
6/7=2,8=2,9=2,10=2,28=1/1;  
99/5=1,9=1/99;
```

[No Title]

Symbolic Z-matrix:

Charge = 0 Multiplicity = 1

|   |   |         |         |         |
|---|---|---------|---------|---------|
| C | 0 | -3.0597 | -2.7254 | -0.7675 |
| C | 0 | -1.9585 | -3.4276 | -1.072  |
| C | 0 | -2.9624 | -1.4435 | -1.5448 |
| C | 0 | -1.8131 | -0.636  | -0.9257 |
| C | 0 | -0.5614 | -1.3266 | -1.5179 |
| C | 0 | -1.2093 | -2.6203 | -2.0885 |
| O | 0 | -2.3481 | -1.9783 | -2.7521 |
| C | 0 | -1.7625 | 0.809   | -1.3063 |
| N | 0 | 0.5118  | -1.3378 | -0.5177 |
| O | 0 | -2.4839 | 1.311   | -2.1638 |
| O | 0 | -0.8389 | 1.5678  | -0.6484 |
| C | 0 | 1.558   | -2.3239 | -0.8529 |
| C | 0 | 2.5966  | -2.5002 | 0.2322  |
| C | 0 | 3.9526  | -2.2579 | -0.0305 |
| C | 0 | 4.9069  | -2.4163 | 0.976   |
| C | 0 | 4.5176  | -2.8233 | 2.2509  |
| C | 0 | 3.1741  | -3.0753 | 2.5219  |

|   |   |         |         |         |
|---|---|---------|---------|---------|
| C | 0 | 2.218   | -2.9173 | 1.5179  |
| C | 0 | -0.0521 | 0.9722  | 0.2809  |
| C | 0 | 1.0591  | 0.0394  | -0.2521 |
| N | 0 | -0.1768 | 1.2001  | 1.5454  |
| C | 0 | 1.8344  | 0.719   | -1.4106 |
| H | 0 | 1.7491  | -0.0552 | 0.5968  |
| C | 0 | 2.4883  | 2.0203  | -1.0011 |
| C | 0 | 3.5827  | 2.0196  | -0.1248 |
| C | 0 | 4.1725  | 3.221   | 0.2699  |
| C | 0 | 3.6776  | 4.4323  | -0.2087 |
| C | 0 | 2.5949  | 4.4438  | -1.0856 |
| C | 0 | 2.0028  | 3.2441  | -1.4827 |
| C | 0 | -1.2221 | 2.1403  | 1.9705  |
| C | 0 | -2.6051 | 1.5341  | 1.9461  |
| C | 0 | -3.6404 | 2.1447  | 1.2245  |
| C | 0 | -4.9044 | 1.5557  | 1.1667  |
| C | 0 | -5.1494 | 0.3592  | 1.8379  |
| C | 0 | -4.1342 | -0.2458 | 2.5758  |
| C | 0 | -2.8695 | 0.3408  | 2.6347  |
| H | 0 | -3.8171 | -2.9779 | -0.0411 |
| H | 0 | -1.6494 | -4.3726 | -0.6529 |
| H | 0 | -3.9059 | -0.9404 | -1.7606 |
| H | 0 | -1.8971 | -0.7084 | 0.1644  |
| H | 0 | -0.2121 | -0.7757 | -2.4033 |
| H | 0 | -0.6196 | -3.1871 | -2.8108 |
| H | 0 | 2.0343  | -2.0799 | -1.8102 |
| H | 0 | 1.1056  | -3.3142 | -0.9899 |
| H | 0 | 4.2794  | -1.9433 | -1.0196 |
| H | 0 | 5.9565  | -2.2244 | 0.7651  |
| H | 0 | 5.2626  | -2.9468 | 3.0334  |
| H | 0 | 2.8708  | -3.3949 | 3.5161  |
| H | 0 | 1.1712  | -3.1134 | 1.743   |
| H | 0 | 1.1754  | 0.9062  | -2.2664 |
| H | 0 | 2.6288  | 0.0638  | -1.7851 |
| H | 0 | 3.9872  | 1.0842  | 0.2589  |
| H | 0 | 5.0206  | 3.2121  | 0.9508  |
| H | 0 | 4.1391  | 5.3679  | 0.0986  |
| H | 0 | 2.2134  | 5.39    | -1.4632 |
| H | 0 | 1.1617  | 3.2789  | -2.1724 |
| H | 0 | -1.18   | 3.0606  | 1.3738  |
| H | 0 | -1.0044 | 2.4496  | 2.9999  |
| H | 0 | -3.4709 | 3.0809  | 0.6952  |
| H | 0 | -5.7023 | 2.034   | 0.6026  |
| H | 0 | -6.1365 | -0.0958 | 1.7963  |
| H | 0 | -4.3284 | -1.1739 | 3.1088  |
| H | 0 | -2.0833 | -0.1446 | 3.211   |

Stoichiometry C<sub>30</sub>H<sub>28</sub>N<sub>2</sub>O<sub>3</sub>

Framework group C1[X(C<sub>30</sub>H<sub>28</sub>N<sub>2</sub>O<sub>3</sub>)]

Deg. of freedom 183

Full point group C1 NOp 1

Largest Abelian subgroup C1 NOp 1

Largest concise Abelian subgroup C1 NOp 1

Standard orientation:

| Center<br>Number | Atomic<br>Number | Atomic<br>Type | Coordinates (Angstroms) |           |           |
|------------------|------------------|----------------|-------------------------|-----------|-----------|
|                  |                  |                | X                       | Y         | Z         |
| 1                | 6                | 0              | -3.081309               | -2.705878 | -0.805782 |
| 2                | 6                | 0              | -1.980702               | -3.409833 | -1.108369 |
| 3                | 6                | 0              | -2.976728               | -1.420718 | -1.576726 |
| 4                | 6                | 0              | -1.828039               | -0.619361 | -0.948577 |

|    |   |   |           |           |           |
|----|---|---|-----------|-----------|-----------|
| 5  | 6 | 0 | -0.575557 | -1.310830 | -1.538103 |
| 6  | 6 | 0 | -1.224465 | -2.600041 | -2.117649 |
| 7  | 8 | 0 | -2.358319 | -1.951745 | -2.783594 |
| 8  | 6 | 0 | -1.771547 | 0.827215  | -1.322298 |
| 9  | 7 | 0 | 0.492921  | -1.329688 | -0.532975 |
| 10 | 8 | 0 | -2.487500 | 1.335203  | -2.180836 |
| 11 | 8 | 0 | -0.848874 | 1.580343  | -0.656625 |
| 12 | 6 | 0 | 1.537864  | -2.317240 | -0.867821 |
| 13 | 6 | 0 | 2.570876  | -2.501485 | 0.221286  |
| 14 | 6 | 0 | 3.928774  | -2.261876 | -0.033977 |
| 15 | 6 | 0 | 4.877905  | -2.427619 | 0.976220  |
| 16 | 6 | 0 | 4.481495  | -2.839333 | 2.247410  |
| 17 | 6 | 0 | 3.136031  | -3.088716 | 2.510987  |
| 18 | 6 | 0 | 2.185087  | -2.923379 | 1.503279  |
| 19 | 6 | 0 | -0.068124 | 0.978240  | 0.273587  |
| 20 | 6 | 0 | 1.042894  | 0.044706  | -0.258507 |
| 21 | 7 | 0 | -0.198082 | 1.200705  | 1.538525  |
| 22 | 6 | 0 | 1.825530  | 0.727376  | -1.410249 |
| 23 | 1 | 0 | 1.728647  | -0.055759 | 0.593155  |
| 24 | 6 | 0 | 2.481212  | 2.024906  | -0.991736 |
| 25 | 6 | 0 | 3.571499  | 2.017055  | -0.110359 |
| 26 | 6 | 0 | 4.162867  | 3.214938  | 0.292597  |
| 27 | 6 | 0 | 3.673660  | 4.429831  | -0.182737 |
| 28 | 6 | 0 | 2.595106  | 4.448452  | -1.064610 |
| 29 | 6 | 0 | 2.001454  | 3.252286  | -1.469969 |
| 30 | 6 | 0 | -1.242676 | 2.141944  | 1.963062  |
| 31 | 6 | 0 | -2.627267 | 1.539832  | 1.929435  |
| 32 | 6 | 0 | -3.657441 | 2.156697  | 1.205830  |
| 33 | 6 | 0 | -4.922829 | 1.571596  | 1.139438  |
| 34 | 6 | 0 | -5.174369 | 0.372744  | 1.803988  |
| 35 | 6 | 0 | -4.164355 | -0.238538 | 2.543825  |
| 36 | 6 | 0 | -2.898278 | 0.344155  | 2.611310  |
| 37 | 1 | 0 | -3.842811 | -2.959527 | -0.084086 |
| 38 | 1 | 0 | -1.676256 | -4.357625 | -0.692176 |
| 39 | 1 | 0 | -3.917773 | -0.913930 | -1.794608 |
| 40 | 1 | 0 | -1.917338 | -0.696509 | 0.140776  |
| 41 | 1 | 0 | -0.220557 | -0.756887 | -2.419327 |
| 42 | 1 | 0 | -0.633013 | -3.165217 | -2.839789 |
| 43 | 1 | 0 | 2.019325  | -2.070228 | -1.821760 |
| 44 | 1 | 0 | 1.083291  | -3.305601 | -1.011473 |
| 45 | 1 | 0 | 4.261086  | -1.943690 | -1.020089 |
| 46 | 1 | 0 | 5.929021  | -2.237767 | 0.771097  |
| 47 | 1 | 0 | 5.222476  | -2.968551 | 3.032798  |
| 48 | 1 | 0 | 2.827180  | -3.411993 | 3.502285  |
| 49 | 1 | 0 | 1.136692  | -3.117504 | 1.722597  |
| 50 | 1 | 0 | 1.171072  | 0.920381  | -2.268242 |
| 51 | 1 | 0 | 2.619803  | 0.071621  | -1.784048 |
| 52 | 1 | 0 | 3.971537  | 1.078751  | 0.270923  |
| 53 | 1 | 0 | 5.007747  | 3.200488  | 0.977393  |
| 54 | 1 | 0 | 4.136381  | 5.362687  | 0.131002  |
| 55 | 1 | 0 | 2.218070  | 5.397461  | -1.439635 |
| 56 | 1 | 0 | 1.163689  | 3.292656  | -2.163414 |
| 57 | 1 | 0 | -1.195168 | 3.064842  | 1.370797  |
| 58 | 1 | 0 | -1.028908 | 2.445902  | 2.994875  |
| 59 | 1 | 0 | -3.482805 | 3.094820  | 0.681630  |
| 60 | 1 | 0 | -5.716720 | 2.054761  | 0.573828  |
| 61 | 1 | 0 | -6.162555 | -0.079228 | 1.755700  |
| 62 | 1 | 0 | -4.363685 | -1.168508 | 3.071647  |
| 63 | 1 | 0 | -2.116165 | -0.146131 | 3.189032  |

-----  
Rotational constants (GHZ): 0.1468826 0.1022815 0.0816284  
Standard basis: 6-31G (6D, 7F)

There are 371 symmetry adapted basis functions of A<sub>g</sub> symmetry.

Integral buffers will be 262144 words long.

Raffenetti 2 integral format.

Two-electron integral symmetry is turned on.

371 basis functions, 882 primitive gaussians, 371 cartesian basis functions

123 alpha electrons 123 beta electrons

nuclear repulsion energy 3766.0356916259 Hartrees.

NAtoms= 63 NActive= 63 NUniq= 63 SFac= 1.00D+00 NAtFMM= 60 Big=T

-----  
United Atom Topological Model (UA0 parameters set).

| Nord | Group | Hybr | Charge | Alpha | Radius | Bonded to |                 |
|------|-------|------|--------|-------|--------|-----------|-----------------|
| 1    | CH    | *    | 0.00   | 1.00  | 2.125  | C2 [d]    | C3 [s]          |
| 2    | CH    | *    | 0.00   | 1.00  | 2.125  | C1 [d]    | C6 [s]          |
| 3    | CH    | *    | 0.00   | 1.00  | 2.125  | C1 [s]    | C4 [s] O7 [s]   |
| 4    | CH    | *    | 0.00   | 1.00  | 2.125  | C3 [s]    | C5 [s] C8 [s]   |
| 5    | CH    | *    | 0.00   | 1.00  | 2.125  | C4 [s]    | C6 [s] N9 [s]   |
| 6    | CH    | *    | 0.00   | 1.00  | 2.125  | C2 [s]    | C5 [s] O7 [s]   |
| 7    | O     | *    | 0.00   | 1.00  | 1.750  | C3 [s]    | C6 [s]          |
| 8    | C     | *    | 0.00   | 1.00  | 1.925  | C4 [s]    | O10 [d] O11 [s] |
| 9    | N     | *    | 0.00   | 1.00  | 1.830  | C5 [s]    | C12 [s] C20 [s] |
| 10   | O     | *    | 0.00   | 1.00  | 1.750  | C8 [d]    |                 |
| 11   | O     | *    | 0.00   | 1.00  | 1.750  | C8 [s]    | C19 [s]         |
| 12   | CH2   | *    | 0.00   | 1.00  | 2.325  | N9 [s]    | C13 [s]         |
| 13   | C     | *    | 0.00   | 1.00  | 1.925  | C12 [s]   | C14 [s] C18 [s] |
| 14   | CH    | *    | 0.00   | 1.00  | 2.125  | C13 [s]   | C15 [s]         |
| 15   | CH    | *    | 0.00   | 1.00  | 2.125  | C14 [s]   | C16 [s]         |
| 16   | CH    | *    | 0.00   | 1.00  | 2.125  | C15 [s]   | C17 [s]         |
| 17   | CH    | *    | 0.00   | 1.00  | 2.125  | C16 [s]   | C18 [s]         |
| 18   | CH    | *    | 0.00   | 1.00  | 2.125  | C13 [s]   | C17 [s]         |
| 19   | C     | *    | 0.00   | 1.00  | 1.925  | O11 [s]   | C20 [s] N21 [d] |
| 20   | CH    | *    | 0.00   | 1.00  | 2.125  | N9 [s]    | C19 [s] C22 [s] |
| 21   | N     | *    | 0.00   | 1.00  | 1.830  | C19 [d]   | C30 [s]         |
| 22   | CH2   | *    | 0.00   | 1.00  | 2.325  | C20 [s]   | C24 [s]         |
| 24   | C     | *    | 0.00   | 1.00  | 1.925  | C22 [s]   | C25 [s] C29 [s] |
| 25   | CH    | *    | 0.00   | 1.00  | 2.125  | C24 [s]   | C26 [s]         |
| 26   | CH    | *    | 0.00   | 1.00  | 2.125  | C25 [s]   | C27 [s]         |
| 27   | CH    | *    | 0.00   | 1.00  | 2.125  | C26 [s]   | C28 [s]         |
| 28   | CH    | *    | 0.00   | 1.00  | 2.125  | C27 [s]   | C29 [s]         |
| 29   | CH    | *    | 0.00   | 1.00  | 2.125  | C24 [s]   | C28 [s]         |
| 30   | CH2   | *    | 0.00   | 1.00  | 2.325  | N21 [s]   | C31 [s]         |
| 31   | C     | *    | 0.00   | 1.00  | 1.925  | C30 [s]   | C32 [s] C36 [s] |
| 32   | CH    | *    | 0.00   | 1.00  | 2.125  | C31 [s]   | C33 [s]         |
| 33   | CH    | *    | 0.00   | 1.00  | 2.125  | C32 [s]   | C34 [s]         |
| 34   | CH    | *    | 0.00   | 1.00  | 2.125  | C33 [s]   | C35 [s]         |
| 35   | CH    | *    | 0.00   | 1.00  | 2.125  | C34 [s]   | C36 [s]         |
| 36   | CH    | *    | 0.00   | 1.00  | 2.125  | C31 [s]   | C35 [s]         |

-----  
Polarizable Continuum Model (PCM)

Model : PCM.

Atomic radii : UA0 (Simple United Atom Topological Model).

Polarization charges : Total charges.

Charge compensation : None.

Solution method : Matrix inversion.

Cavity : GePol (RMin=0.200 OFac=0.890).

Default sphere list used, NSphG= 35.

Tesserae with average area of 0.200 Ang\*\*2.

Solvent : Methanol, Eps= 32.630000.

-----  
One-electron integrals computed using PRISM.

NBasis= 371 RedAO= T NBF= 371

NBsUse= 371 1.00D-06 NBFU= 371

Harris functional with IExCor= 402 diagonalized for initial guess.

ExpMin= 1.61D-01 ExpMax= 5.48D+03 ExpMxC= 8.25D+02 IAcc=1 IRadAn= 1 AccDes= 1.00D-06

HarFok: IExCor= 402 AccDes= 1.00D-06 IRadAn= 1 IDoV=1

ScaDFX= 1.000000 1.000000 1.000000 1.000000

Initial guess orbital symmetries:

Occupied (A) (A)

(A) (A) (A) (A) (A) (A) (A) (A) (A) (A) (A) (A) (A)

(A) (A) (A) (A) (A) (A) (A) (A) (A) (A) (A) (A) (A)

(A) (A) (A) (A) (A) (A) (A) (A) (A) (A) (A) (A) (A)

(A) (A) (A) (A) (A) (A) (A) (A) (A) (A) (A) (A) (A)

(A) (A) (A) (A) (A) (A) (A) (A) (A) (A) (A) (A) (A)

(A) (A) (A) (A) (A) (A) (A) (A) (A) (A) (A) (A) (A)

(A) (A) (A) (A) (A) (A) (A) (A) (A) (A) (A) (A) (A)

(A) (A) (A) (A) (A) (A) (A) (A) (A) (A) (A) (A) (A)

(A) (A) (A) (A) (A) (A) (A) (A) (A) (A) (A) (A) (A)

(A) (A) (A)

Virtual (A) (A)

(A) (A) (A) (A) (A) (A) (A) (A) (A) (A) (A) (A) (A)

(A) (A) (A) (A) (A) (A) (A) (A) (A) (A) (A) (A) (A)

(A) (A) (A) (A) (A) (A) (A) (A) (A) (A) (A) (A) (A)

(A) (A) (A) (A) (A) (A) (A) (A) (A) (A) (A) (A) (A)

(A) (A) (A) (A) (A) (A) (A) (A) (A) (A) (A) (A) (A)

(A) (A) (A) (A) (A) (A) (A) (A) (A) (A) (A) (A) (A)

(A) (A) (A) (A) (A) (A) (A) (A) (A) (A) (A) (A) (A)

(A) (A) (A) (A) (A) (A) (A) (A) (A) (A) (A) (A) (A)

(A) (A) (A) (A) (A) (A) (A) (A) (A) (A) (A) (A) (A)

(A) (A) (A) (A) (A) (A) (A) (A) (A) (A) (A) (A) (A)

(A) (A) (A) (A) (A) (A) (A) (A) (A) (A) (A) (A) (A)

(A) (A) (A) (A) (A) (A) (A) (A) (A) (A) (A) (A) (A)

(A) (A) (A) (A) (A) (A) (A) (A) (A) (A) (A) (A) (A)

(A) (A) (A) (A) (A) (A) (A) (A) (A) (A) (A) (A) (A)

(A) (A) (A) (A) (A) (A) (A) (A) (A) (A) (A) (A) (A)

(A) (A) (A) (A) (A) (A) (A) (A) (A) (A) (A) (A) (A)

(A) (A) (A) (A) (A) (A) (A) (A) (A) (A) (A) (A) (A)

(A) (A) (A) (A) (A) (A) (A) (A) (A) (A) (A) (A) (A)

(A) (A) (A) (A) (A) (A) (A) (A) (A) (A) (A) (A) (A)

(A) (A) (A) (A) (A) (A) (A) (A)

The electronic state of the initial guess is 1-A.

Warning! Cutoffs for single-point calculations used.

Requested convergence on RMS density matrix=1.00D-04 within 128 cycles.

Requested convergence on MAX density matrix=1.00D-02.

Requested convergence on energy=5.00D-05.

No special actions if energy rises.

Error on total polarization charges = 0.02738

SCF Done: E(RB+HF-LYP) = -1494.74570262 A.U. after 10 cycles

Conv = 0.3286D-05 -V/T = 2.0051

S\*\*2 = 0.0000

-----  
Variational PCM results  
=====

<psi(f)| H |psi(f)> (a.u.) = -1494.711902

<psi(f)|H+V(f)/2|psi(f)> (a.u.) = -1494.745703

Total free energy in solution:

with all non electrostatic terms (a.u.) = -1494.728213

-----  
(Polarized solute)-Solvent (kcal/mol) = -21.21  
-----

Cavitation energy (kcal/mol) = 40.57

Dispersion energy (kcal/mol) = -31.98

Repulsion energy (kcal/mol) = 2.39

Total non electrostatic (kcal/mol) = 10.98  
-----

Partition over spheres:

| Sphere | on Atom | Surface | Charge | GEI   | GCav | GDR   |
|--------|---------|---------|--------|-------|------|-------|
| 1      | C1      | 14.51   | -0.036 | -0.73 | 1.74 | -1.18 |
| 2      | C2      | 14.69   | -0.037 | -0.83 | 1.67 | -1.43 |
| 3      | C3      | 6.47    | -0.042 | -0.21 | 1.07 | -0.64 |
| 4      | C4      | 0.00    | 0.000  | 0.00  | 0.34 | 0.00  |
| 5      | C5      | 2.38    | -0.022 | -0.19 | 0.39 | -0.19 |
| 6      | C6      | 10.68   | -0.063 | -0.95 | 0.97 | -0.97 |
| 7      | O7      | 8.89    | 0.129  | -2.72 | 0.97 | -0.95 |
| 8      | C8      | 0.00    | 0.000  | 0.00  | 0.21 | 0.00  |
| 9      | N9      | 0.00    | 0.000  | 0.00  | 0.20 | 0.00  |
| 10     | O10     | 13.26   | 0.156  | -3.47 | 1.85 | -1.40 |
| 11     | O11     | 0.75    | 0.009  | -0.14 | 0.51 | -0.08 |
| 12     | C12     | 12.89   | -0.044 | -0.49 | 1.51 | -1.11 |
| 13     | C13     | 0.17    | 0.001  | 0.00  | 0.06 | 0.00  |
| 14     | C14     | 9.12    | -0.022 | -0.50 | 1.47 | -0.96 |
| 15     | C15     | 14.53   | -0.025 | -0.52 | 1.69 | -1.39 |
| 16     | C16     | 17.26   | -0.015 | -0.52 | 1.69 | -1.54 |
| 17     | C17     | 17.03   | -0.018 | -0.52 | 1.69 | -1.58 |
| 18     | C18     | 9.01    | -0.009 | -0.25 | 1.53 | -0.85 |
| 19     | C19     | 0.00    | 0.000  | 0.00  | 0.12 | 0.00  |
| 20     | C20     | 0.00    | 0.000  | 0.00  | 0.43 | 0.00  |
| 21     | N21     | 2.47    | 0.045  | -0.91 | 0.79 | -0.25 |
| 22     | C22     | 10.79   | -0.027 | -0.20 | 1.43 | -1.10 |
| 23     | C24     | 0.10    | 0.000  | 0.00  | 0.08 | 0.00  |
| 24     | C25     | 6.11    | 0.014  | -0.08 | 1.54 | -0.57 |
| 25     | C26     | 17.11   | -0.017 | -0.50 | 1.69 | -1.58 |
| 26     | C27     | 16.86   | -0.015 | -0.48 | 1.69 | -1.53 |
| 27     | C28     | 16.97   | -0.018 | -0.44 | 1.69 | -1.50 |
| 28     | C29     | 9.85    | -0.009 | -0.21 | 1.47 | -0.98 |
| 29     | C30     | 21.99   | -0.048 | -0.27 | 2.27 | -1.77 |
| 30     | C31     | 0.25    | 0.001  | -0.01 | 0.05 | 0.00  |
| 31     | C32     | 11.48   | -0.029 | -0.34 | 1.32 | -1.01 |
| 32     | C33     | 14.24   | -0.031 | -0.43 | 1.69 | -1.39 |
| 33     | C34     | 13.93   | -0.029 | -0.53 | 1.69 | -1.36 |
| 34     | C35     | 14.70   | -0.030 | -0.59 | 1.69 | -1.28 |
| 35     | C36     | 11.23   | -0.023 | -0.37 | 1.40 | -0.99 |

Added spheres: 119.78 0.225 -3.84 0.00 0.00

\*\*\*\*\*

Population analysis using the SCF density.

\*\*\*\*\*

Orbital symmetries:

Occupied (A) (A)

(A) (A) (A) (A) (A) (A) (A) (A) (A) (A) (A) (A) (A)

(A) (A) (A) (A) (A) (A) (A) (A) (A) (A) (A) (A) (A)

(A) (A) (A) (A) (A) (A) (A) (A) (A) (A) (A) (A) (A)

(A) (A) (A) (A) (A) (A) (A) (A) (A) (A) (A) (A) (A)

(A) (A) (A) (A) (A) (A) (A) (A) (A) (A) (A) (A) (A)

(A) (A) (A) (A) (A) (A) (A) (A) (A) (A) (A) (A) (A)

(A) (A) (A) (A) (A) (A) (A) (A) (A) (A) (A) (A) (A)

(A) (A) (A) (A) (A) (A) (A) (A) (A) (A) (A) (A) (A)

(A) (A) (A) (A) (A) (A) (A) (A) (A) (A) (A) (A) (A)

(A) (A) (A)

Virtual (A) (A)

(A) (A) (A) (A) (A) (A) (A) (A) (A) (A) (A) (A) (A)

(A) (A) (A) (A) (A) (A) (A) (A) (A) (A) (A) (A) (A)

(A) (A) (A) (A) (A) (A) (A) (A) (A) (A) (A) (A) (A)





|                            |         |         |         |         |         |
|----------------------------|---------|---------|---------|---------|---------|
| Alpha virt. eigenvalues -- | 0.58385 | 0.58642 | 0.59072 | 0.59675 | 0.60060 |
| Alpha virt. eigenvalues -- | 0.60175 | 0.60715 | 0.61227 | 0.61682 | 0.62096 |
| Alpha virt. eigenvalues -- | 0.62166 | 0.62744 | 0.62984 | 0.63208 | 0.63499 |
| Alpha virt. eigenvalues -- | 0.63667 | 0.63904 | 0.64107 | 0.64679 | 0.64771 |
| Alpha virt. eigenvalues -- | 0.64853 | 0.65359 | 0.65486 | 0.65687 | 0.65973 |
| Alpha virt. eigenvalues -- | 0.66265 | 0.66403 | 0.66645 | 0.67071 | 0.67202 |
| Alpha virt. eigenvalues -- | 0.68049 | 0.68574 | 0.68939 | 0.69632 | 0.70015 |
| Alpha virt. eigenvalues -- | 0.70313 | 0.70780 | 0.71803 | 0.72607 | 0.73368 |
| Alpha virt. eigenvalues -- | 0.74364 | 0.74696 | 0.75725 | 0.76691 | 0.77237 |
| Alpha virt. eigenvalues -- | 0.80542 | 0.81467 | 0.82322 | 0.83081 | 0.83423 |
| Alpha virt. eigenvalues -- | 0.84002 | 0.84083 | 0.85129 | 0.85420 | 0.85563 |
| Alpha virt. eigenvalues -- | 0.86040 | 0.86501 | 0.86615 | 0.86874 | 0.87112 |
| Alpha virt. eigenvalues -- | 0.87407 | 0.87740 | 0.87969 | 0.88696 | 0.88771 |
| Alpha virt. eigenvalues -- | 0.89265 | 0.89773 | 0.90548 | 0.91336 | 0.92228 |
| Alpha virt. eigenvalues -- | 0.92531 | 0.92975 | 0.93173 | 0.93813 | 0.94227 |
| Alpha virt. eigenvalues -- | 0.94929 | 0.95438 | 0.96299 | 0.96476 | 0.96554 |
| Alpha virt. eigenvalues -- | 0.97107 | 0.97653 | 0.98712 | 0.99625 | 0.99936 |
| Alpha virt. eigenvalues -- | 1.00105 | 1.00176 | 1.01243 | 1.02428 | 1.03153 |
| Alpha virt. eigenvalues -- | 1.04292 | 1.04636 | 1.05629 | 1.06218 | 1.06856 |
| Alpha virt. eigenvalues -- | 1.07893 | 1.08196 | 1.09319 | 1.10316 | 1.10844 |
| Alpha virt. eigenvalues -- | 1.11539 | 1.12484 | 1.13441 | 1.14492 | 1.15149 |
| Alpha virt. eigenvalues -- | 1.16447 | 1.16968 | 1.17775 | 1.18257 | 1.18990 |
| Alpha virt. eigenvalues -- | 1.20420 | 1.20634 | 1.21333 | 1.22378 | 1.23139 |
| Alpha virt. eigenvalues -- | 1.23455 | 1.23871 | 1.24781 | 1.27756 | 1.28320 |
| Alpha virt. eigenvalues -- | 1.29443 | 1.33023 | 1.36117 | 1.37679 | 1.38328 |
| Alpha virt. eigenvalues -- | 1.40310 | 1.43237 | 1.44560 | 1.46410 | 1.46641 |
| Alpha virt. eigenvalues -- | 1.47056 | 1.48310 | 1.48884 | 1.50146 | 1.52443 |
| Alpha virt. eigenvalues -- | 1.55393 | 1.57255 | 1.62182 | 1.65552 | 1.68592 |
| Alpha virt. eigenvalues -- | 1.75629 | 1.76775 | 1.79279 | 1.84010 | 1.89945 |
| Alpha virt. eigenvalues -- | 1.91751 | 1.92477 | 1.94099 | 1.96270 | 2.01259 |
| Alpha virt. eigenvalues -- | 2.05885 | 2.17873 | 2.56915 |         |         |

Condensed to atoms (all electrons):

Mulliken atomic charges:

|    |             |
|----|-------------|
| 1  |             |
| 1  | C -0.068769 |
| 2  | C -0.068563 |
| 3  | C -0.066940 |
| 4  | C -0.190902 |
| 5  | C 0.051033  |
| 6  | C -0.097345 |
| 7  | O -0.481921 |
| 8  | C 0.549909  |
| 9  | N -0.452245 |
| 10 | O -0.444045 |
| 11 | O -0.504712 |
| 12 | C -0.208167 |
| 13 | C 0.072096  |
| 14 | C -0.175660 |
| 15 | C -0.153787 |
| 16 | C -0.145418 |
| 17 | C -0.156059 |
| 18 | C -0.144469 |
| 19 | C 0.401325  |
| 20 | C -0.008321 |
| 21 | N -0.341765 |
| 22 | C -0.358154 |
| 23 | H 0.182965  |
| 24 | C 0.087173  |
| 25 | C -0.163045 |
| 26 | C -0.155418 |
| 27 | C -0.146692 |
| 28 | C -0.154492 |

29 C -0.165678  
30 C -0.260948  
31 C 0.066815  
32 C -0.169387  
33 C -0.149889  
34 C -0.145777  
35 C -0.151384  
36 C -0.160530  
37 H 0.183986  
38 H 0.185477  
39 H 0.185953  
40 H 0.218377  
41 H 0.182690  
42 H 0.194603  
43 H 0.142127  
44 H 0.175942  
45 H 0.158714  
46 H 0.154749  
47 H 0.153316  
48 H 0.155247  
49 H 0.153036  
50 H 0.161602  
51 H 0.171059  
52 H 0.140573  
53 H 0.154247  
54 H 0.151350  
55 H 0.153046  
56 H 0.153051  
57 H 0.176452  
58 H 0.175633  
59 H 0.162620  
60 H 0.158460  
61 H 0.156200  
62 H 0.158930  
63 H 0.161726

Sum of Mulliken charges= 0.00000

Atomic charges with hydrogens summed into heavy atoms:

1  
1 C 0.115216  
2 C 0.116914  
3 C 0.119013  
4 C 0.027475  
5 C 0.233724  
6 C 0.097259  
7 O -0.481921  
8 C 0.549909  
9 N -0.452245  
10 O -0.444045  
11 O -0.504712  
12 C 0.109902  
13 C 0.072096  
14 C -0.016946  
15 C 0.000962  
16 C 0.007898  
17 C -0.000813  
18 C 0.008567  
19 C 0.401325  
20 C 0.174644  
21 N -0.341765  
22 C -0.025493  
23 H 0.000000  
24 C 0.087173

25 C -0.022472  
26 C -0.001171  
27 C 0.004658  
28 C -0.001445  
29 C -0.012628  
30 C 0.091136  
31 C 0.066815  
32 C -0.006767  
33 C 0.008572  
34 C 0.010422  
35 C 0.007546  
36 C 0.001196  
37 H 0.000000  
38 H 0.000000  
39 H 0.000000  
40 H 0.000000  
41 H 0.000000  
42 H 0.000000  
43 H 0.000000  
44 H 0.000000  
45 H 0.000000  
46 H 0.000000  
47 H 0.000000  
48 H 0.000000  
49 H 0.000000  
50 H 0.000000  
51 H 0.000000  
52 H 0.000000  
53 H 0.000000  
54 H 0.000000  
55 H 0.000000  
56 H 0.000000  
57 H 0.000000  
58 H 0.000000  
59 H 0.000000  
60 H 0.000000  
61 H 0.000000  
62 H 0.000000  
63 H 0.000000

Sum of Mulliken charges= 0.00000

Electronic spatial extent (au):  $\langle R^{*2} \rangle = 14547.4125$

Charge= 0.0000 electrons

Dipole moment (field-independent basis, Debye):

X= 2.1351 Y= -3.3852 Z= 3.0808 Tot= 5.0507

Quadrupole moment (field-independent basis, Debye-Ang):

XX= -185.5729 YY= -189.1707 ZZ= -212.9101

XY= 3.1814 XZ= -14.8818 YZ= -0.4597

Traceless Quadrupole moment (field-independent basis, Debye-Ang):

XX= 10.3117 YY= 6.7139 ZZ= -17.0256

XY= 3.1814 XZ= -14.8818 YZ= -0.4597

Octapole moment (field-independent basis, Debye-Ang\*\*2):

XXX= -22.7385 YYY= 31.9304 ZZZ= 40.8235 XYY= -1.6333

XXY= -18.8759 XXZ= 67.6110 XZZ= 59.4565 YZZ= -27.0389

YYZ= 10.2162 XYZ= 21.7373

Hexadecapole moment (field-independent basis, Debye-Ang\*\*3):

XXXX= -9456.9226 YYYY= -6052.8730 ZZZZ= -3153.2481 XXXY= 0.5454

XXXZ= 114.1379 YYYYX= 225.4225 YYYZ= 2.1403 ZZZX= -37.7258

ZZZY= -103.6359 XXYY= -2767.6084 XXZZ= -2370.0800 YYZZ= -1563.0149

XXYZ= -65.4880 YYXZ= -4.2683 ZZXY= -63.9261

N-N= 3.766035691626D+03 E-N=-1.100958993090D+04 KE= 1.487194854033D+03

Test job not archived.

1|1|UNPC-UNK|SP|RB3LYP|6-31G|C30H28N2O3|PCUSER|15-Jul-2011|0|# RB3LYP  
/6-31G SCRF=(PCM,SOLVENT=METHANOL) TEST|[No Title]||0,1|C,0,-3.0597,-  
2.7254,-0.7675|C,0,-1.9585,-3.4276,-1.072|C,0,-2.9624,-1.4435,-1.5448|  
C,0,-1.8131,-0.636,-0.9257|C,0,-0.5614,-1.3266,-1.5179|C,0,-1.2093,-2.  
6203,-2.0885|O,0,-2.3481,-1.9783,-2.7521|C,0,-1.7625,0.809,-1.3063|N,0  
,0.5118,-1.3378,-0.5177|O,0,-2.4839,1.311,-2.1638|O,0,-0.8389,1.5678,-  
0.6484|C,0,1.558,-2.3239,-0.8529|C,0,2.5966,-2.5002,0.2322|C,0,3.9526,  
-2.2579,-0.0305|C,0,4.9069,-2.4163,0.976|C,0,4.5176,-2.8233,2.2509|C,0  
,3.1741,-3.0753,2.5219|C,0,2.218,-2.9173,1.5179|C,0,-0.0521,0.9722,0.2  
809|C,0,1.0591,0.0394,-0.2521|N,0,-0.1768,1.2001,1.5454|C,0,1.8344,0.7  
19,-1.4106|H,0,1.7491,-0.0552,0.5968|C,0,2.4883,2.0203,-1.0011|C,0,3.5  
827,2.0196,-0.1248|C,0,4.1725,3.221,0.2699|C,0,3.6776,4.4323,-0.2087|C  
,0,2.5949,4.4438,-1.0856|C,0,2.0028,3.2441,-1.4827|C,0,-1.2221,2.1403,  
1.9705|C,0,-2.6051,1.5341,1.9461|C,0,-3.6404,2.1447,1.2245|C,0,-4.9044  
,1.5557,1.1667|C,0,-5.1494,0.3592,1.8379|C,0,-4.1342,-0.2458,2.5758|C,  
0,-2.8695,0.3408,2.6347|H,0,-3.8171,-2.9779,-0.0411|H,0,-1.6494,-4.372  
6,-0.6529|H,0,-3.9059,-0.9404,-1.7606|H,0,-1.8971,-0.7084,0.1644|H,0,-  
0.2121,-0.7757,-2.4033|H,0,-0.6196,-3.1871,-2.8108|H,0,2.0343,-2.0799,  
-1.8102|H,0,1.1056,-3.3142,-0.9899|H,0,4.2794,-1.9433,-1.0196|H,0,5.95  
65,-2.2244,0.7651|H,0,5.2626,-2.9468,3.0334|H,0,2.8708,-3.3949,3.5161|  
H,0,1.1712,-3.1134,1.743|H,0,1.1754,0.9062,-2.2664|H,0,2.6288,0.0638,-  
1.7851|H,0,3.9872,1.0842,0.2589|H,0,5.0206,3.2121,0.9508|H,0,4.1391,5.  
3679,0.0986|H,0,2.2134,5.39,-1.4632|H,0,1.1617,3.2789,-2.1724|H,0,-1.1  
8,3.0606,1.3738|H,0,-1.0044,2.4496,2.9999|H,0,-3.4709,3.0809,0.6952|H,  
0,-5.7023,2.034,0.6026|H,0,-6.1365,-0.0958,1.7963|H,0,-4.3284,-1.1739,  
3.1088|H,0,-2.0833,-0.1446,3.211|Version=x86-Win32-G03RevB.03|State=1  
-A|HF=-1494.7457026|RMSD=3.286e-006|Dipole=0.8494829,-1.3238782,1.2142  
168|PG=C01 [X(C30H28N2O3)]||@
